# Supplementary material for: Chiral bifunctional sulfide-catalyzed asymmetric bromoaminocyclizations
Source: Royal Society of Chemistry journal article supplement (doi:10.1039/d0ob00459f), 2020-01-01
Supplement: d0ob00459f1.pdf [file d0ob00459f1.pdf]

## Supplementary Information

### Chiral bifunctional sulfide-catalyzed asymmetric bromoaminocyclizations

Takumi Nakamura,<sup>a</sup> Ken Okuno,<sup>a</sup> Kazuma Kaneko,<sup>b</sup>  
Masahiro Yamanaka<sup>\*b</sup> and Seiji Shirakawa<sup>\*a</sup>

*<sup>a</sup>Department of Environmental Science, Graduate School of Fisheries and Environmental Sciences,  
Nagasaki University, 1-14 Bunkyo-machi, Nagasaki 852-8521, Japan*

*\*E-mail: seijishirakawa@nagasaki-u.ac.jp*

*<sup>b</sup>Department of Chemistry and Research Center for Smart Molecules, Faculty of Science, Rikkyo  
University, 3-34-1, Nishi-Ikebukuro, Toshima-ku, Tokyo 171-8501, Japan*

*\*E-mail: myamanak@rikkyo.ac.jp*

### Table of Contents

|                                                            |      |
|------------------------------------------------------------|------|
| <b>General Information</b>                                 | S-2  |
| <b>Table S1</b>                                            | S-2  |
| <b>Experimental Section</b>                                | S-3  |
| 1. Details of computational method                         | S-3  |
| 2. Synthesis of catalysts                                  | S-6  |
| 3. Synthesis of substrates                                 | S-6  |
| 4. General procedure for asymmetric bromoaminocyclization  | S-10 |
| 5. Transformations of product <b>3g</b>                    | S-18 |
| 6. Determination of the absolute configuration of products | S-21 |
| <b>References</b>                                          | S-22 |
| <b>NMR Charts</b>                                          | S-23 |
| <b>HPLC Charts</b>                                         | S-62 |
| <b>Cartesian Coordinates</b>                               | S-87 |

## General Information

$^1\text{H}$ ,  $^{13}\text{C}$ , and  $^{19}\text{F}$  NMR spectra were measured on a JEOL JNM-AL 400 NMR instrument (400 MHz for  $^1\text{H}$  NMR, 100 MHz for  $^{13}\text{C}$  NMR, and 376 Hz for  $^{19}\text{F}$  NMR). Tetramethylsilane (TMS) served as the internal standard (0 ppm) for  $^1\text{H}$  NMR,  $\text{CDCl}_3$  served as the internal standard (77.0 ppm) for  $^{13}\text{C}$  NMR, and hexafluorobenzene served as the external standard (-164.9 ppm) for  $^{19}\text{F}$  NMR. The following abbreviations were used to express the multiplicities: s = singlet; d = doublet; t = triplet; m = multiplet; br = broad. High-resolution mass spectra (HRMS) were measured on a JEOL JMS-700N. Infrared spectra (IR) were measured on a JASCO FT/IR-4200 spectrometer. Optical rotations were measured on a JASCO P-2100 polarimeter. High performance liquid chromatography (HPLC) was performed on Shimadzu LC-20AT and SPD-20A instruments using Daicel Chiralpak AD-3, IC-3, IE-3, or Chiralcel OD-3 columns (4.6 mm  $\times$  250 mm). All reactions were monitored by thin-layer chromatography using Merck precoated TLC plates (silica gel 60GF-254, 0.25 mm), with visualization by the use of UV lamp (254 nm), or dyes such as  $\text{KMnO}_4$ . The products were purified by flash column chromatography on silica gel. Dehydrated solvents were purchased from Kanto Chemical.

**Table S1** Optimization of the reaction solvents<sup>a</sup>

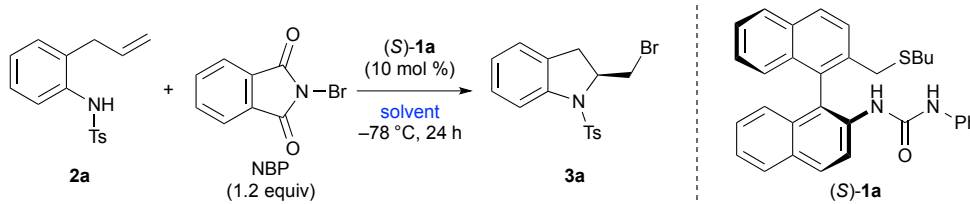

| Entry | Solvent                                         | Yield <sup>b</sup> (%) | er <sup>c</sup> |
|-------|-------------------------------------------------|------------------------|-----------------|
| 1     | $\text{CH}_2\text{Cl}_2$ (2 mL)                 | 80                     | 78:22           |
| 2     | toluene (2 mL)                                  | 26                     | 63:37           |
| 3     | toluene (1 mL)- $\text{CH}_2\text{Cl}_2$ (1 mL) | 81                     | 75:25           |
| 4     | hexane (1 mL)- $\text{CH}_2\text{Cl}_2$ (1 mL)  | 82                     | 77:23           |

<sup>a</sup> Reaction conditions: **2a** (0.10 mmol), NBP (0.12 mmol), (*S*)-**1a** (10 mol %, 0.010 mmol), solvent (2 mL),  $-78\text{ }^\circ\text{C}$ , 24 h. <sup>b</sup> Yield of isolated product **3a**. <sup>c</sup> Enantiomeric ratio (er) was determined by HPLC analysis on a chiral stationary phase.

## Experimental Section

### 1. Details of computational method.

All calculations were performed with the Gaussian 09 package.<sup>1</sup> As a preliminary study, various TS models were explored at the SMD(CH<sub>2</sub>Cl<sub>2</sub>)-B3LYP/6-31G\* level. The promising TS models were further optimized at the SMD(CH<sub>2</sub>Cl<sub>2</sub>)- $\omega$ B97XD/6-31G\* level. Frequency analyses were also carried out to identify the stationary points (TS: one imaginary frequency) and to estimate thermodynamic properties at 298.15 K and 1 atm and Gibbs free energies. Single-point energy calculations of the optimized structures were evaluated at the SMD(CH<sub>2</sub>Cl<sub>2</sub>)- $\omega$ B97XD/def2TZVP level. The molecular structures were depicted by using the CYLview v1.0.561  $\beta$ .<sup>2</sup>

To identify the promising TS model, various concerted **TS1** models consisting of (*S*)-**1a**, NBS, and **2g** were explored based on our previous study (Fig. S1).<sup>3</sup> We found a wide variety of coordination modes among (*S*)-**1a**, NBS, and **2g** through the hydrogen bonding network. The energetically favored **TS1r-1** involving multi-point coordinated succinimide anion found to be the most stable TS model. While **TS1s-1** having similar structural features with **TS1r-1** was not found as a stationary point at the SMD(CH<sub>2</sub>Cl<sub>2</sub>)-B3LYP/6-31G\* level, it was predicted to be more stable by the corresponding approximate TS model partially optimized. The consideration of dispersion interactions was found to be crucial to obtain the promising TS models and reaction pathways. Consequently, we located two distinct concerted (**TS1s**) and stepwise (**TS2r/TS3r**) pathways leading to the major and minor enantiomers, respectively.

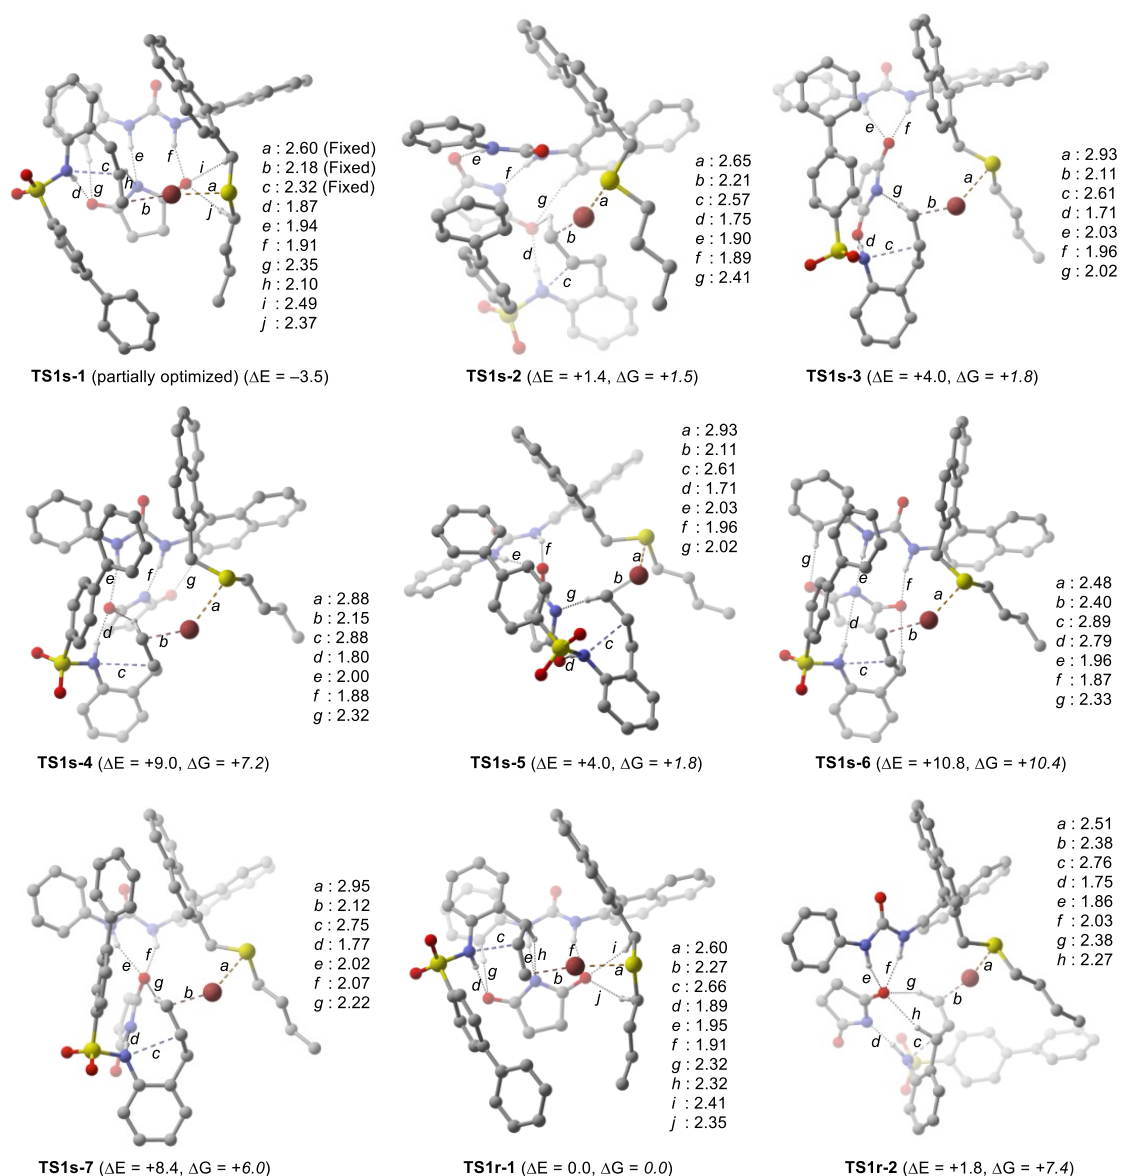

**Fig. S1** 3D structures and the relative Gibbs free energies (**TS1r-1** is set to zero, kcal mol<sup>-1</sup>) of various TS models. Distances are shown in Å.

To clarify the details of the cooperative functions of urea and sulfide moieties in (*S*)-**1a** and the succinimide anion in the energy difference between **TS1s** and **TS3r**, partially defected TS models (**TS-d1** and **-d2**: the sulfide group and the Ph group of the urea moiety are exchanged with H atom, **TS-d3**: the succinimide anion is removed) were investigated (Fig. S2). The **TS-d1** model indicates that the sulfide moiety in (*S*)-**1a** has a

great impact on stabilizing **TS1s**. Removing the sulfide moiety significantly destabilizes **TS1s**. In contrast, **TS-d2** and **-d3** models indicate that the  $\pi/\pi$ , CH/ $\pi$ , and hydrogen bonding interactions around the succinimide anion and the terminal Ph group of the urea moiety in (*S*)-**1a** exist similarly between **TS1s** and **TS3r**. Removing those moieties rarely changes the relative stabilities of **TS1s** and **TS3r**.

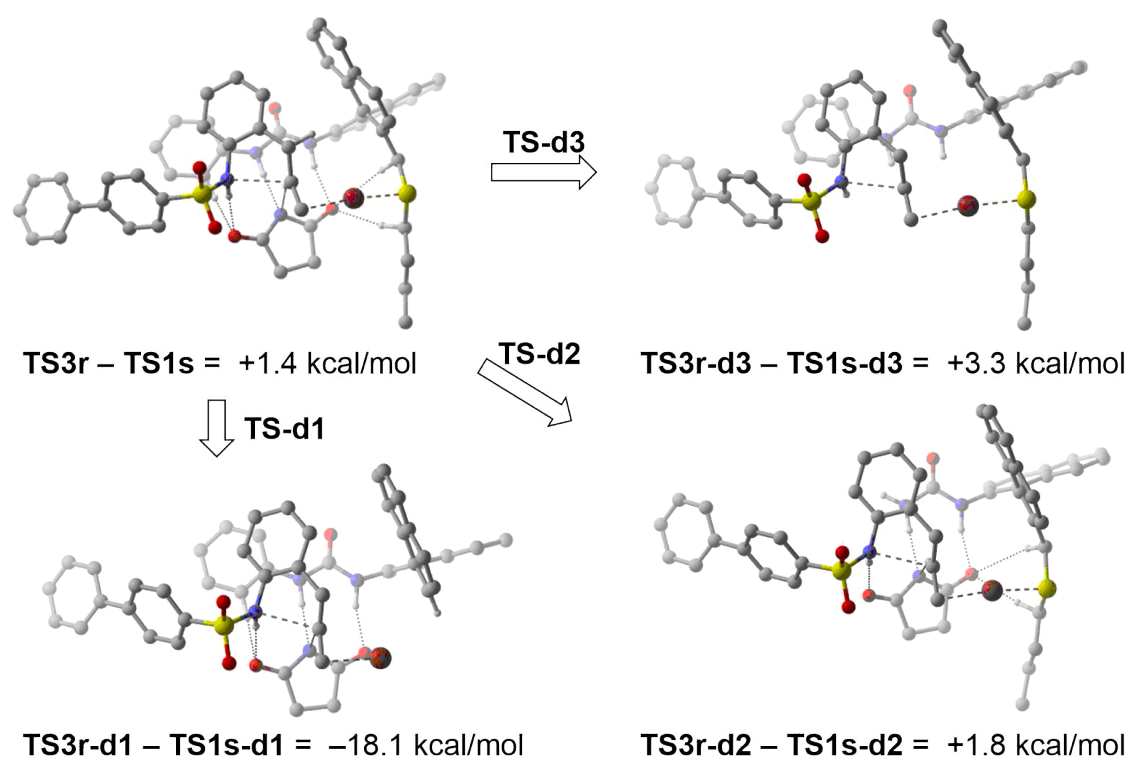

**Fig. S2** 3D structures and the energy differences between **TS3r** and **TS1s** of the partially defected TS models (**TS-d1**, **TS-d2**, and **TS-d3**).

## 2. Synthesis of catalysts.

Catalysts (*S*)-1 and (*S*)-4 were prepared according to the literature.<sup>3</sup>

## 3. Synthesis of substrates.<sup>4</sup>

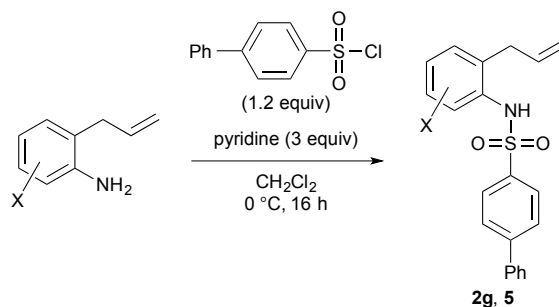

A solution of 2-allylaniline<sup>4</sup> (5.0 mmol) in dichloromethane (10 mL) was cooled to 0 °C. 4-Biphenylsulfonyl chloride (6.0 mmol) and pyridine (15 mmol) was added to the cooled solution of 2-allylaniline, and stirred for 16 h at 0 °C. The reaction mixture was quenched with water (10 mL) at 0 °C. The organic materials were extracted with dichloromethane for three times (5 mL × 3). The combined extracts were dried over Na<sub>2</sub>SO<sub>4</sub> and concentrated. The residue was purified by flash column chromatography on silica gel (hexane/ethyl acetate as eluent) to give substrate.

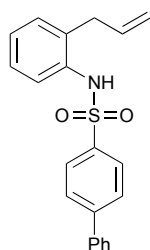

**2g**: 90% yield; <sup>1</sup>H NMR (400 MHz, CDCl<sub>3</sub>) δ 7.78 (td, *J* = 2.0, 8.8 Hz, 2H), 7.65 (td, *J* = 2.0, 8.8 Hz, 2H), 7.60–7.56 (m, 2H), 7.49–7.38 (m, 4H), 7.23 (dt, *J* = 1.6, 7.6 Hz, 1H), 7.16–7.07 (m, 2H), 6.59 (s, 1H), 5.84–5.74 (m, 1H), 5.14–5.10 (m, 1H), 4.98–4.93 (m, 1H), 3.05 (d, *J* = 5.6 Hz, 2H); <sup>13</sup>C NMR (100 MHz, CDCl<sub>3</sub>) δ 145.8, 139.0, 138.2, 135.5, 134.8, 132.1, 130.5, 129.0, 128.5, 127.7, 127.6, 127.5, 127.2, 126.4, 124.6, 117.1, 36.1; IR (neat): 3281, 1331, 1157, 1094, 913, 761, 670 cm<sup>-1</sup>; HRMS (FAB) calcd for C<sub>21</sub>H<sub>20</sub>NO<sub>2</sub>S: 350.1215 ([M+H]<sup>+</sup>), found 350.1216.

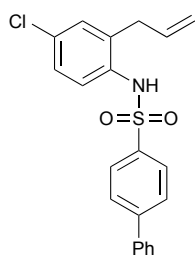

**5a:** 83% yield;  $^1\text{H}$  NMR (400 MHz,  $\text{CDCl}_3$ )  $\delta$  7.77 (d,  $J = 8.4$  Hz, 2H), 7.67 (d,  $J = 8.4$  Hz, 2H), 7.59 (d,  $J = 8.4$  Hz, 2H), 7.50–7.38 (m, 4H), 7.21 (dd,  $J = 2.4, 8.4$  Hz, 1H), 7.09 (d,  $J = 2.4$  Hz, 1H), 6.49 (s, 1H), 5.80–5.70 (m, 1H), 5.17–5.13 (m, 1H), 4.98–4.93 (m, 1H), 3.00 (d,  $J = 6.4$  Hz, 2H);  $^{13}\text{C}$  NMR (100 MHz,  $\text{CDCl}_3$ )  $\delta$  146.0, 138.9, 137.9, 134.6, 134.3, 133.3, 131.9, 130.3, 129.1, 128.6, 127.7, 127.64, 127.56, 127.3, 126.2, 117.7, 35.8; IR (neat): 3277, 1482, 1331, 1160, 1094, 912, 763, 671  $\text{cm}^{-1}$ ; HRMS (FAB) calcd for  $\text{C}_{21}\text{H}_{19}\text{ClNO}_2\text{S}$ : 384.0825 ( $[\text{M}+\text{H}]^+$ ), found 384.0825.

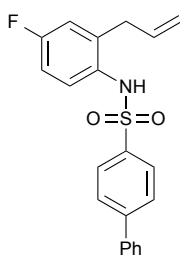

**5b:** 81% yield;  $^1\text{H}$  NMR (400 MHz,  $\text{CDCl}_3$ )  $\delta$  7.75 (d,  $J = 8.4$  Hz, 2H), 7.67 (d,  $J = 8.0$  Hz, 2H), 7.61–7.57 (m, 2H), 7.50–7.40 (m, 3H), 7.36 (dd,  $J = 5.2, 8.8$  Hz, 1H), 6.92 (dt,  $J = 2.8, 8.4$  Hz, 1H), 6.82 (dd,  $J = 2.8, 9.2$  Hz, 1H), 6.39 (s, 1H), 5.77–5.68 (m, 1H), 5.15–5.11 (m, 1H), 4.97–4.92 (m, 1H), 2.99 (d,  $J = 6.4$  Hz, 2H);  $^{13}\text{C}$  NMR (100 MHz,  $\text{CDCl}_3$ )  $\delta$  161.1 (d,  $J = 246$  Hz), 145.9, 139.0, 138.0, 136.3 (d,  $J = 7.4$  Hz), 134.7, 130.4 (d,  $J = 2.1$  Hz), 129.1, 128.6, 127.9 (d,  $J = 8.2$  Hz), 127.60, 127.59, 127.3, 117.6, 117.0 (d,  $J = 23.0$  Hz), 114.4 (d,  $J = 22.2$  Hz), 35.9; IR (neat): 3273, 1494, 1330, 1158, 1094, 913, 763, 671  $\text{cm}^{-1}$ ; HRMS (FAB) calcd for  $\text{C}_{21}\text{H}_{19}\text{FNO}_2\text{S}$ : 368.1121 ( $[\text{M}+\text{H}]^+$ ), found 368.1120.

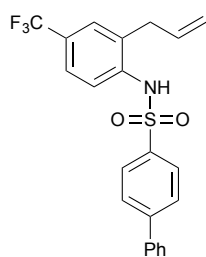

**5c:** 84% yield;  $^1\text{H}$  NMR (400 MHz,  $\text{CDCl}_3$ )  $\delta$  7.83 (d,  $J = 8.8$  Hz, 2H), 7.68 (d,  $J = 8.8$  Hz, 2H), 7.64–7.57 (m, 3H), 7.50–7.40 (m, 4H), 7.35 (s, 1H), 6.78 (s, 1H), 5.86–5.76 (m, 1H), 5.23–5.20 (m, 1H), 5.03–4.99 (m, 1H), 3.17 (d,  $J = 6.0$  Hz, 2H);  $^{13}\text{C}$  NMR (100 MHz,  $\text{CDCl}_3$ )  $\delta$  146.3, 138.9, 138.3, 137.8, 134.3, 130.8, 129.1, 128.7, 127.8, 127.60 (q,  $J = 4.1$  Hz), 127.58, 127.51 (q,  $J = 33.0$  Hz), 127.3, 124.9 (q,  $J = 3.8$  Hz), 123.8 (q,  $J = 270$  Hz), 122.4, 118.1, 36.1; IR (neat): 3291, 1329, 1158, 1119, 1092, 914, 840, 763, 671  $\text{cm}^{-1}$ ; HRMS (FAB) calcd for  $\text{C}_{22}\text{H}_{19}\text{F}_3\text{NO}_2\text{S}$ : 418.1089 ( $[\text{M}+\text{H}]^+$ ), found 418.1089.

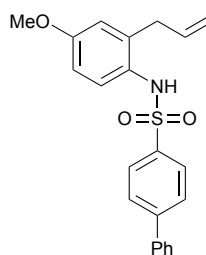

**5d:** 87% yield;  $^1\text{H}$  NMR (400 MHz,  $\text{CDCl}_3$ )  $\delta$  7.74 (d,  $J = 8.4$  Hz, 2H), 7.66 (d,  $J = 8.0$  Hz, 2H), 7.60 (d,  $J = 8.0$  Hz, 2H), 7.50–7.39 (m, 3H), 7.26 (d,  $J = 8.4$  Hz, 1H), 6.74 (dd,  $J = 3.2, 8.8$  Hz, 1H), 6.63 (d,  $J = 2.8$  Hz, 1H), 6.29 (s, 1H), 5.78–5.69 (m, 1H), 5.10–5.07 (m, 1H), 4.96–

4.91 (m, 1H), 3.78 (s, 3H), 2.96 (d,  $J = 6.4$  Hz, 2H);  $^{13}\text{C}$  NMR (100 MHz,  $\text{CDCl}_3$ )  $\delta$  158.5, 145.7, 139.1, 138.3, 136.1, 135.5, 129.0, 128.5, 128.3, 127.6, 127.5, 127.3, 127.1, 116.9, 115.8, 112.4, 55.3, 36.2; IR (neat): 3274, 1497, 1327, 1156, 1094, 1038, 913, 763, 671  $\text{cm}^{-1}$ ; HRMS (FAB) calcd for  $\text{C}_{22}\text{H}_{21}\text{NO}_3\text{S}$ : 379.1242 ( $[\text{M}]^+$ ), found 379.1242.

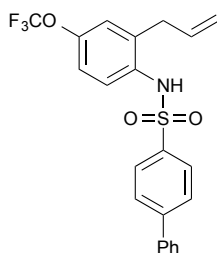

**5e**: 80% yield;  $^1\text{H}$  NMR (400 MHz,  $\text{CDCl}_3$ )  $\delta$  7.78 (td,  $J = 2.0, 8.8$  Hz, 2H), 7.68 (td,  $J = 2.0, 8.8$  Hz, 2H), 7.61–7.57 (m, 2H), 7.50–7.40 (m, 4H), 7.09 (dd,  $J = 2.0, 8.8$  Hz, 1H), 6.96 (d,  $J = 2.8$  Hz, 1H), 6.55 (s, 1H), 5.81–5.71 (m, 1H), 5.18–5.15 (m, 1H), 5.00–4.95 (m, 1H), 3.05 (d,  $J = 6.0$  Hz, 2H);  $^{13}\text{C}$  NMR (100 MHz,  $\text{CDCl}_3$ )  $\delta$  147.1 (q,  $J = 1.7$  Hz), 146.1, 138.9, 138.0, 134.7, 134.5, 133.3, 129.1, 128.7, 127.7, 127.6, 127.3, 126.2, 122.8, 120.3 (q,  $J = 256$  Hz), 119.9, 117.9, 35.9; IR (neat): 3275, 1496, 1252, 1220, 1152, 1094, 917, 763, 696, 671  $\text{cm}^{-1}$ ; HRMS (FAB) calcd for  $\text{C}_{22}\text{H}_{19}\text{F}_3\text{NO}_3\text{S}$ : 434.1038 ( $[\text{M}+\text{H}]^+$ ), found 434.1038.

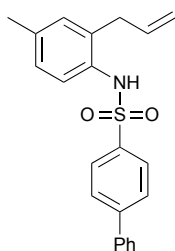

**5f**: 91% yield;  $^1\text{H}$  NMR (400 MHz,  $\text{CDCl}_3$ )  $\delta$  7.76 (d,  $J = 8.0$  Hz, 2H), 7.65 (d,  $J = 8.8$  Hz, 2H), 7.59 (d,  $J = 8.8$  Hz, 2H), 7.49–7.39 (m, 3H), 7.29 (d,  $J = 8.4$  Hz, 1H), 7.03 (d,  $J = 8.4$  Hz, 1H), 6.89 (s, 1H), 6.43 (s, 1H), 5.82–5.71 (m, 1H), 5.12–5.08 (m, 1H), 4.97–4.91 (m, 1H), 2.98 (d,  $J = 6.0$  Hz, 2H), 2.28 (s, 3H);  $^{13}\text{C}$  NMR (100 MHz,  $\text{CDCl}_3$ )  $\delta$  145.6, 139.1, 138.3, 136.5, 135.7, 132.7, 132.0, 131.1, 129.0, 128.5, 128.3, 127.6, 127.5, 127.2, 125.3, 116.8, 36.0, 20.9; IR (neat): 3273, 1498, 1395, 1329, 1160, 1094, 913, 763, 671  $\text{cm}^{-1}$ ; HRMS (FAB) calcd for  $\text{C}_{22}\text{H}_{21}\text{NO}_2\text{S}$ : 363.1293 ( $[\text{M}]^+$ ), found 363.1293.

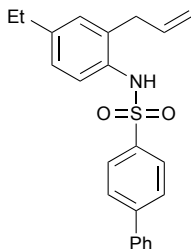

**5g**: 89% yield;  $^1\text{H}$  NMR (400 MHz,  $\text{CDCl}_3$ )  $\delta$  7.77 (d,  $J = 8.8$  Hz, 2H), 7.65 (d,  $J = 8.4$  Hz, 2H), 7.59 (dd,  $J = 1.2, 8.8$  Hz, 2H), 7.49–7.39 (m, 3H), 7.31 (d,  $J = 8.4$  Hz, 1H), 7.05 (dd,  $J = 1.6, 8.4$  Hz, 1H), 6.91 (d,  $J = 1.6$  Hz, 1H), 6.45 (s, 1H), 5.83–5.73 (m, 1H), 5.12–5.08 (m, 1H), 4.98–4.93 (m, 1H), 3.01 (d,  $J = 6.4$  Hz, 2H), 2.58 (q,  $J = 7.2$  Hz, 2H), 1.20 (t,  $J = 7.2$  Hz, 3H);  $^{13}\text{C}$  NMR (100 MHz,  $\text{CDCl}_3$ )  $\delta$  145.7, 142.8, 139.1, 138.4, 135.8, 132.7, 132.2, 129.9, 129.0, 128.5, 127.6, 127.5, 127.3, 127.0, 125.3, 116.9, 36.2, 28.2,



15.3; IR (neat): 3258, 1396, 1327, 1159, 1094, 913, 839, 762, 673  $\text{cm}^{-1}$ ; HRMS (FAB) calcd for  $\text{C}_{23}\text{H}_{23}\text{NO}_2\text{S}$ : 377.1449 ( $[\text{M}]^+$ ), found 377.1450.

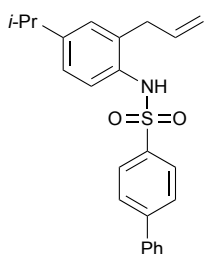

**5h**: 88% yield;  $^1\text{H}$  NMR (400 MHz,  $\text{CDCl}_3$ )  $\delta$  7.78 (d,  $J = 8.0$  Hz, 2H), 7.65 (d,  $J = 8.4$  Hz, 2H), 7.60 (d,  $J = 8.4$  Hz, 2H), 7.49–7.39 (m, 3H), 7.31 (d,  $J = 8.0$  Hz, 1H), 7.08 (dd,  $J = 2.0, 8.4$  Hz, 1H), 6.89 (d,  $J = 2.0$  Hz, 1H), 6.46 (s, 1H), 5.84–5.74 (m, 1H), 5.13–5.09 (m, 1H), 4.99–4.94 (m, 1H), 3.03 (d,  $J = 6.0$  Hz, 2H), 2.84 (septet,  $J = 6.8$  Hz, 1H), 1.21 (d,  $J = 6.8$  Hz, 6H);  $^{13}\text{C}$  NMR (100 MHz,  $\text{CDCl}_3$ )  $\delta$  147.4, 145.7, 139.2, 138.5, 135.9, 132.5, 132.3, 129.0, 128.6, 128.5, 127.6, 127.5, 127.3, 125.6, 125.1, 116.9, 36.4, 33.6, 23.9; IR (neat): 3275, 2960, 1498, 1396, 1331, 1161, 1095, 913, 763, 671  $\text{cm}^{-1}$ ; HRMS (FAB) calcd for  $\text{C}_{24}\text{H}_{25}\text{NO}_2\text{S}$ : 391.1606 ( $[\text{M}]^+$ ), found 391.1606.

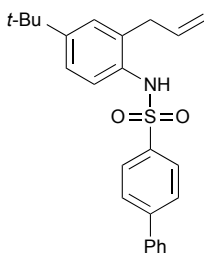

**5i**: 87% yield;  $^1\text{H}$  NMR (400 MHz,  $\text{CDCl}_3$ )  $\delta$  7.79 (d,  $J = 8.4$  Hz, 2H), 7.66 (d,  $J = 8.8$  Hz, 2H), 7.59 (d,  $J = 7.2$  Hz, 2H), 7.49–7.39 (m, 3H), 7.31 (d,  $J = 8.8$  Hz, 1H), 7.22 (dd,  $J = 2.0, 8.4$  Hz, 1H), 7.08 (d,  $J = 2.0$  Hz, 1H), 6.51 (s, 1H), 5.84–5.75 (m, 1H), 5.13–5.09 (m, 1H), 4.99–4.94 (m, 1H), 3.06 (d,  $J = 6.0$  Hz, 2H), 1.27 (s, 9H);  $^{13}\text{C}$  NMR (100 MHz,  $\text{CDCl}_3$ )  $\delta$  149.6, 145.6, 139.1, 138.6, 135.9, 132.04, 131.97, 129.0, 128.5, 127.6, 127.5, 127.4, 127.2, 124.6, 124.5, 116.8, 36.5, 34.4, 31.3; IR (neat): 3275, 2963, 1499, 1395, 1331, 1161, 1094, 910, 839, 762, 730, 696, 670  $\text{cm}^{-1}$ ; HRMS (FAB) calcd for  $\text{C}_{25}\text{H}_{27}\text{NO}_2\text{S}$ : 405.1762 ( $[\text{M}]^+$ ), found 405.1763.

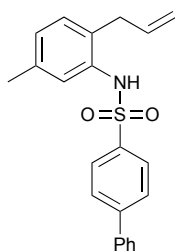

**5j**: 90% yield;  $^1\text{H}$  NMR (400 MHz,  $\text{CDCl}_3$ )  $\delta$  7.77 (td,  $J = 2.0, 8.8$  Hz, 2H), 7.65 (td,  $J = 2.0, 8.8$  Hz, 2H), 7.60–7.56 (m, 2H), 7.49–7.38 (m, 3H), 7.29 (s, 1H), 6.96–6.94 (m, 2H), 6.53–6.52 (m, 1H), 5.81–5.71 (m, 1H), 5.11–5.08 (m, 1H), 4.96–4.90 (m, 1H), 2.96 (d,  $J = 6.0$  Hz, 2H), 2.31 (s, 3H);  $^{13}\text{C}$  NMR (100 MHz,  $\text{CDCl}_3$ )  $\delta$  145.7, 139.1, 138.3, 137.6, 135.8, 134.6, 130.3, 129.0, 128.5, 127.55, 127.47, 127.23, 127.19, 125.3, 116.8, 35.7, 21.0; IR (neat): 3279, 1395, 1329, 1165, 1155, 1094, 908, 840, 762, 722, 696, 670  $\text{cm}^{-1}$ ; HRMS (FAB) calcd for  $\text{C}_{22}\text{H}_{22}\text{NO}_2\text{S}$ : 364.1371 ( $[\text{M}+\text{H}]^+$ ), found 364.1370.

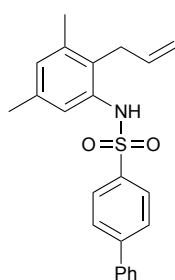

**5k**: 89% yield;  $^1\text{H}$  NMR (400 MHz,  $\text{CDCl}_3$ )  $\delta$  7.80 (d,  $J = 8.4$  Hz, 2H), 7.65 (td,  $J = 2.0, 8.4$  Hz, 2H), 7.61–7.57 (m, 2H), 7.50–7.38 (m, 3H), 7.13 (s, 1H), 6.85 (s, 1H), 6.44 (s, 1H), 5.81–5.72 (m, 1H), 5.05–5.01 (m, 1H), 4.82–4.75 (m, 1H), 3.03 (d,  $J = 5.2$  Hz, 2H), 2.26 (s, 3H), 2.17 (s, 3H);  $^{13}\text{C}$  NMR (100 MHz,  $\text{CDCl}_3$ )  $\delta$  145.6, 139.2, 138.4, 137.4, 136.8, 134.8, 134.7, 129.2, 129.0, 128.5, 127.6, 127.5, 127.2, 122.9, 116.1, 31.2, 21.0, 19.9; IR (neat): 3289, 1395, 1328, 1163, 910, 841, 763, 672  $\text{cm}^{-1}$ ; HRMS (FAB) calcd for  $\text{C}_{23}\text{H}_{24}\text{NO}_2\text{S}$ : 378.1528 ( $[\text{M}+\text{H}]^+$ ), found 378.1528.

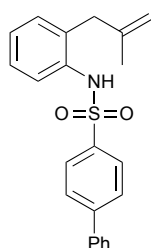

**7**: 80% yield;  $^1\text{H}$  NMR (400 MHz,  $\text{CDCl}_3$ )  $\delta$  7.78 (d,  $J = 8.8$  Hz, 2H), 7.64 (d,  $J = 8.4$  Hz, 2H), 7.58 (d,  $J = 8.4$  Hz, 2H), 7.52–7.38 (m, 4H), 7.24 (dt,  $J = 1.6, 8.0$  Hz, 1H), 7.12 (dt,  $J = 0.8, 8.0$  Hz, 1H), 7.05 (dd,  $J = 1.6, 7.6$  Hz, 1H), 6.76 (s, 1H), 4.89 (s, 1H), 4.63 (m, 1H), 2.95 (s, 2H), 1.57 (s, 3H);  $^{13}\text{C}$  NMR (100 MHz,  $\text{CDCl}_3$ )  $\delta$  145.7, 143.5, 139.0, 138.3, 135.2, 131.4, 130.9, 129.0, 128.5, 127.7, 127.5, 127.2, 126.0, 124.1, 112.9, 40.8, 22.1; IR (neat): 3290, 1780, 1335, 1160, 1094, 923, 902, 840, 763, 671  $\text{cm}^{-1}$ ; HRMS (FAB) calcd for  $\text{C}_{22}\text{H}_{22}\text{NO}_2\text{S}$ : 364.1371 ( $[\text{M}+\text{H}]^+$ ), found 364.1371.

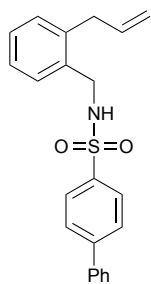

**9**: 32% yield;  $^1\text{H}$  NMR (400 MHz,  $\text{CDCl}_3$ )  $\delta$  7.93 (d,  $J = 8.4$  Hz, 2H), 7.72 (d,  $J = 8.4$  Hz, 2H), 7.62 (d,  $J = 8.0$  Hz, 2H), 7.52–7.41 (m, 3H), 7.25–7.13 (m, 4H), 5.94–5.83 (m, 1H), 5.05–5.01 (m, 1H), 4.89–4.83 (m, 1H), 4.59 (t,  $J = 6.0$  Hz, 1H), 4.16 (d,  $J = 5.6$  Hz, 2H), 3.33 (d,  $J = 5.6$  Hz, 2H);  $^{13}\text{C}$  NMR (100 MHz,  $\text{CDCl}_3$ )  $\delta$  145.7, 139.3, 138.2, 138.1, 136.9, 133.8, 130.2, 129.6, 129.0, 128.5, 127.7, 127.3, 126.8, 116.1, 45.0, 36.7; IR (neat): 3276, 1326, 1156, 1096, 839, 762, 670  $\text{cm}^{-1}$ ; HRMS (FAB) calcd for  $\text{C}_{22}\text{H}_{22}\text{NO}_2\text{S}$ : 364.1371 ( $[\text{M}+\text{H}]^+$ ), found 364.1371.

#### 4. General procedure for asymmetric bromoaminocyclizations.

A solution of substrate (0.10 mmol) and catalyst (*S*)-**1a** (10 mol %, 0.010 mmol) in dichloromethane (2 mL) was cooled to  $-90$   $^\circ\text{C}$  (or  $-78$   $^\circ\text{C}$ ). After stirring for 5 min at  $-90$   $^\circ\text{C}$  (or  $-78$   $^\circ\text{C}$ ), *N*-bromophthalimide (NBP) (0.12 mmol) was added to the cooled

reaction solution. The reaction mixture was stirred for 24 h at  $-90\text{ }^{\circ}\text{C}$  (or  $-78\text{ }^{\circ}\text{C}$ ). After 24 h, the reaction mixture was quenched with saturated aqueous  $\text{Na}_2\text{SO}_3$  (4 mL) at  $-90\text{ }^{\circ}\text{C}$  (or  $-78\text{ }^{\circ}\text{C}$ ) and stirred for 10 min at  $-90\text{ }^{\circ}\text{C}$  (or  $-78\text{ }^{\circ}\text{C}$ ). The quenched reaction mixture was diluted with dichloromethane (2 mL) and water (2 mL), and warmed to room temperature. The organic materials were extracted with dichloromethane for three times ( $5\text{ mL} \times 3$ ). The combined extracts were dried over  $\text{Na}_2\text{SO}_4$  and concentrated. The residue was purified by flash column chromatography on silica gel (hexane/ethyl acetate as eluent) to give bromoaminocyclization product. The enantioselectivity of the product was determined by HPLC analysis on a chiral stationary phase.

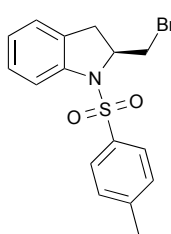

**3a:**<sup>4d</sup>  $[\alpha]_{\text{D}}^{19} +56.1$  ( $c = 1.0$ ,  $\text{CHCl}_3$ , 78:22 er); HPLC analysis: Daicel Chiralcel OD-3, hexane/2-propanol = 20:1, flow rate = 0.5 mL/min, 254 nm; retention time: 13.6 min (major) and 14.8 min (minor).  $^1\text{H}$  NMR (400 MHz,  $\text{CDCl}_3$ )  $\delta$  7.65 (d,  $J = 8.4$  Hz, 1H), 7.57 (d,  $J = 8.4$  Hz, 2H), 7.25–7.17 (m, 3H), 7.08–7.02 (m, 2H), 4.46–4.40 (m, 1H), 3.82 (dd,  $J = 3.6$ , 10.0 Hz, 1H), 3.41 (t,  $J = 10.0$  Hz, 1H), 2.94–2.91 (m, 2H), 2.36 (s, 3H);  $^{13}\text{C}$  NMR (100 MHz,  $\text{CDCl}_3$ )  $\delta$  144.3, 141.1, 134.5, 130.6, 129.7, 127.9, 127.0, 125.2, 124.9, 116.8, 62.1, 35.9, 33.2, 21.5; IR (neat): 1479, 1460, 1354, 1166, 1091, 1026, 758, 670  $\text{cm}^{-1}$ .

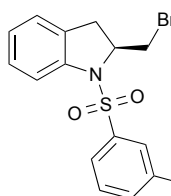

**3b:**  $[\alpha]_{\text{D}}^{24} +30.9$  ( $c = 0.78$ ,  $\text{CHCl}_3$ , 68:32 er); HPLC analysis: Daicel Chiralpak IE-3, hexane/2-propanol = 20:1, flow rate = 0.5 mL/min, 254 nm; retention time: 31.0 min (major) and 33.1 min (minor).  $^1\text{H}$  NMR (400 MHz,  $\text{CDCl}_3$ )  $\delta$  7.66 (d,  $J = 7.6$  Hz, 1H), 7.50 (s, 1H), 7.47 (d,  $J = 7.6$  Hz, 1H), 7.34 (d,  $J = 7.2$  Hz, 1H), 7.29–7.21 (m, 2H), 7.09–7.02 (m, 2H), 4.48–4.41 (m, 1H), 3.82 (dd,  $J = 3.6$ , 10.0 Hz, 1H), 3.42 (t,  $J = 10.0$  Hz, 1H), 2.97–2.88 (m, 2H), 2.33 (s, 3H);  $^{13}\text{C}$  NMR (100 MHz,  $\text{CDCl}_3$ )  $\delta$  141.0, 139.3, 137.3, 134.1, 130.6, 128.9, 127.9, 127.4, 125.2, 125.0, 124.1, 116.8, 62.1, 35.9, 33.2, 21.3; IR (neat): 1487, 1459, 1355, 1162, 1100, 1025, 758, 698, 687  $\text{cm}^{-1}$ ; HRMS (FAB) calcd for  $\text{C}_{16}\text{H}_{16}\text{BrNO}_2\text{S}$ : 365.0085 ( $[\text{M}]^+$ ), found 365.0084.

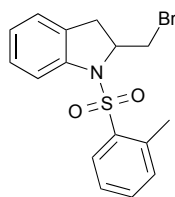

**3c:**  $[\alpha]_D^{26} +2.3$  ( $c = 0.60$ ,  $\text{CHCl}_3$ , 58:42 er); HPLC analysis: Daicel Chiralpak IE-3, hexane/2-propanol = 20:1, flow rate = 0.5 mL/min, 254 nm; retention time: 27.8 min (major) and 31.1 min (minor).  $^1\text{H NMR}$  (400 MHz,  $\text{CDCl}_3$ )  $\delta$  7.86 (dd,  $J = 1.6, 8.8$  Hz, 1H), 7.46–7.37 (m, 2H), 7.29–7.25 (m, 2H), 7.18–7.13 (m, 2H), 7.03 (dt,  $J = 0.8, 7.6$  Hz, 1H), 4.61–4.54 (m, 1H), 3.77 (dd,  $J = 3.2, 10.0$  Hz, 1H), 3.38 (t,  $J = 10.0$  Hz, 1H), 3.19 (dd,  $J = 9.6, 16.8$  Hz, 1H), 3.07 (dd,  $J = 2.8, 16.8$  Hz, 1H), 2.51 (s, 3H);  $^{13}\text{C NMR}$  (100 MHz,  $\text{CDCl}_3$ )  $\delta$  141.2, 137.9, 137.2, 133.1, 133.0, 129.7, 129.4, 127.9, 126.3, 125.4, 124.5, 116.0, 62.1, 35.2, 33.1, 20.8; IR (neat): 1478, 1460, 1342, 1163, 756, 710, 692  $\text{cm}^{-1}$ ; HRMS (FAB) calcd for  $\text{C}_{16}\text{H}_{16}\text{BrNO}_2\text{S}$ : 365.0085 ( $[\text{M}]^+$ ), found 365.0085.

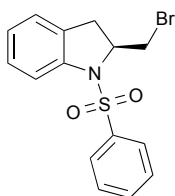

**3d:**<sup>4d</sup>  $[\alpha]_D^{23} +37.5$  ( $c = 0.95$ ,  $\text{CHCl}_3$ , 70:30 er); HPLC analysis: Daicel Chiralpak IE-3, hexane/2-propanol = 20:1, flow rate = 0.5 mL/min, 254 nm; retention time: 33.1 min (major) and 41.2 min (minor).  $^1\text{H NMR}$  (400 MHz,  $\text{CDCl}_3$ )  $\delta$  7.71–7.65 (m, 3H), 7.54 (tt,  $J = 1.6, 7.6$  Hz, 1H), 7.41 (t,  $J = 7.6$  Hz, 2H), 7.26–7.21 (m, 1H), 7.10–7.03 (m, 2H), 4.48–4.41 (m, 1H), 3.82 (dd,  $J = 3.6, 10.0$  Hz, 1H), 3.42 (t,  $J = 10.0$  Hz, 1H), 2.98–2.85 (m, 2H);  $^{13}\text{C NMR}$  (100 MHz,  $\text{CDCl}_3$ )  $\delta$  141.0, 137.4, 133.3, 130.6, 129.1, 128.0, 127.0, 125.3, 125.1, 116.8, 62.2, 35.8, 33.1; IR (neat): 1479, 1446, 1355, 1168, 1102, 1091, 1026, 757, 719, 688  $\text{cm}^{-1}$ .

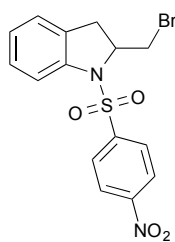

**3e:**<sup>4d</sup> HPLC analysis: Daicel Chiralpak AD-3, hexane/2-propanol = 20:1, flow rate = 0.5 mL/min, 254 nm; retention time: 42.5 min and 56.7 min.  $^1\text{H NMR}$  (400 MHz,  $\text{CDCl}_3$ )  $\delta$  8.26 (d,  $J = 8.8$  Hz, 2H), 7.89 (d,  $J = 9.2$  Hz, 2H), 7.66 (d,  $J = 8.4$  Hz, 1H), 7.29–7.24 (m, 1H), 7.11–7.07 (m, 2H), 4.48–4.42 (m, 1H), 3.80 (dd,  $J = 3.6, 10.0$  Hz, 1H), 3.44 (t,  $J = 10.0$  Hz, 1H), 3.02–2.89 (m, 2H);  $^{13}\text{C NMR}$  (100 MHz,  $\text{CDCl}_3$ )  $\delta$  150.5, 143.0, 140.1, 130.5, 128.3, 128.2, 125.8, 125.7, 124.4, 116.6, 62.5, 35.4, 33.1; IR (neat): 1530, 1349, 1171, 745, 735, 614  $\text{cm}^{-1}$ .

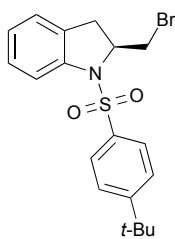

**3f:**  $[\alpha]^{26}_D +63.4$  ( $c = 1.0$ ,  $\text{CHCl}_3$ , 81:19 er); HPLC analysis: Daicel Chiralcel OD-3, hexane/2-propanol = 20:1, flow rate = 0.5 mL/min, 254 nm; retention time: 10.5 min (major) and 11.8 min (minor).  $^1\text{H NMR}$  (400 MHz,  $\text{CDCl}_3$ )  $\delta$  7.66 (d,  $J = 8.0$  Hz, 1H), 7.61 (d,  $J = 8.8$  Hz, 2H), 7.40 (d,  $J = 8.4$  Hz, 2H), 7.23 (t,  $J = 7.6$  Hz, 1H), 7.10–7.03 (m, 2H), 4.47–4.40 (m, 1H), 3.84 (dd,  $J = 3.6, 10.0$  Hz, 1H), 3.42 (t,  $J = 10.0$  Hz, 1H), 2.95 (d,  $J = 6.4$  Hz, 2H), 1.28 (s, 9H);  $^{13}\text{C NMR}$  (100 MHz,  $\text{CDCl}_3$ )  $\delta$  157.2, 141.2, 134.5, 130.4, 128.0, 126.9, 126.1, 125.2, 124.8, 116.6, 62.1, 35.9, 35.1, 32.2, 31.0; IR (neat): 1479, 1170, 1114, 1086, 1026, 761, 637  $\text{cm}^{-1}$ ; HRMS (FAB) calcd for  $\text{C}_{19}\text{H}_{22}\text{BrNO}_2\text{S}$ : 407.0555 ( $[\text{M}]^+$ ), found 407.0554.

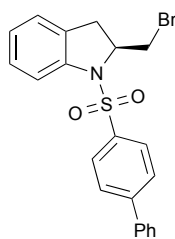

**3g:**  $[\alpha]^{23}_D +98.8$  ( $c = 1.1$ ,  $\text{CHCl}_3$ , 95: 5 er); HPLC analysis: Daicel Chiralcel OD-3, hexane/2-propanol = 20:1, flow rate = 0.5 mL/min, 254 nm; retention time: 20.8 min (major) and 24.2 min (minor).  $^1\text{H NMR}$  (400 MHz,  $\text{CDCl}_3$ )  $\delta$  7.75 (td,  $J = 2.0, 8.8$  Hz, 2H), 7.70 (d,  $J = 8.0$  Hz, 1H), 7.61 (td,  $J = 2.0, 8.4$  Hz, 2H), 7.56–7.53 (m, 2H), 7.47–7.38 (m, 3H), 7.27–7.23 (m, 1H), 7.10–7.04 (m, 2H), 4.51–4.45 (m, 1H), 3.85 (dd,  $J = 4.0, 9.6$  Hz, 1H), 3.44 (t,  $J = 9.6$  Hz, 1H), 2.97 (d,  $J = 6.4$  Hz, 2H);  $^{13}\text{C NMR}$  (100 MHz,  $\text{CDCl}_3$ )  $\delta$  146.1, 141.0, 138.9, 135.9, 130.6, 129.0, 128.6, 128.0, 127.6, 127.5, 127.2, 125.3, 125.1, 116.8, 62.2, 35.9, 32.2; IR (neat): 1478, 1355, 1166, 1094, 1025, 760, 673  $\text{cm}^{-1}$ ; HRMS (FAB) calcd for  $\text{C}_{21}\text{H}_{18}\text{BrNO}_2\text{S}$ : 427.0242 ( $[\text{M}]^+$ ), found 427.0242.

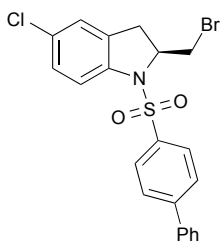

**6a:**  $[\alpha]^{20}_D +125.4$  ( $c = 1.0$ ,  $\text{CHCl}_3$ , 88:12 er); HPLC analysis: Daicel Chiralcel OD-3, hexane/2-propanol = 20:1, flow rate = 0.5 mL/min, 254 nm; retention time: 25.0 min (major) and 28.3 min (minor).  $^1\text{H NMR}$  (400 MHz,  $\text{CDCl}_3$ )  $\delta$  7.74 (d,  $J = 8.4$  Hz, 2H), 7.65–7.61 (m, 3H), 7.56 (d,  $J = 7.6$  Hz, 2H), 7.48–7.39 (m, 3H), 7.22 (dd,  $J = 1.6, 8.4$  Hz, 1H), 7.06 (s, 1H), 4.51–4.45 (m, 1H), 3.82 (dd,  $J = 3.6, 10.0$  Hz, 1H), 3.45 (t,  $J = 10.0$  Hz, 1H), 2.95 (d,  $J = 6.4$  Hz, 2H);  $^{13}\text{C NMR}$  (100 MHz,  $\text{CDCl}_3$ )  $\delta$  146.4, 139.8, 138.8, 135.6, 132.5, 130.3, 129.1, 128.7, 128.1, 127.8, 127.5, 127.2, 125.5, 117.7, 62.4, 35.8, 33.1; IR (neat): 1473, 1359, 1168, 763, 697, 672, 612  $\text{cm}^{-1}$ ; HRMS (FAB) calcd for  $\text{C}_{21}\text{H}_{17}\text{BrClNO}_2\text{S}$ : 460.9852 ( $[\text{M}]^+$ ), found 460.9853.

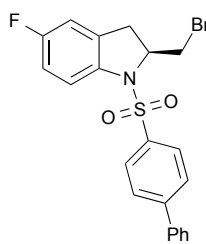

**6b:**  $[\alpha]^{24}_D +106.8$  ( $c = 1.0$ ,  $\text{CHCl}_3$ , 94: 6 er); HPLC analysis: Daicel Chiralcel OD-3, hexane/2-propanol = 20:1, flow rate = 0.5 mL/min, 254 nm; retention time: 26.2 min (major) and 29.7 min (minor).  $^1\text{H}$  NMR (400 MHz,  $\text{CDCl}_3$ )  $\delta$  7.72 (td,  $J = 2.0, 8.8$  Hz, 2H), 7.66–7.61 (m, 3H), 7.57–7.54 (m, 2H), 7.48–7.38 (m, 3H), 6.95 (dt,  $J = 2.8, 8.8$  Hz, 1H), 6.79 (dd,  $J = 2.8, 8.4$  Hz, 1H), 4.53–4.46 (m, 1H), 3.81 (dd,  $J = 3.6, 10.0$  Hz, 1H), 3.44 (t,  $J = 10.0$  Hz, 1H), 2.96–2.86 (m, 2H);  $^{13}\text{C}$  NMR (100 MHz,  $\text{CDCl}_3$ )  $\delta$  160.5 (d,  $J = 242$  Hz), 146.3, 138.8, 137.0 (d,  $J = 2.5$  Hz), 135.5, 132.9 (d,  $J = 8.2$  Hz), 129.1, 128.7, 127.7, 127.6, 127.2, 118.1 (d,  $J = 8.2$  Hz), 114.8 (d,  $J = 23.1$  Hz), 112.5 (d,  $J = 23.8$  Hz), 62.6, 35.7, 33.2 (d,  $J = 1.6$  Hz); IR (neat): 1480, 1357, 1167, 1094, 1027, 761, 672  $\text{cm}^{-1}$ ; HRMS (FAB) calcd for  $\text{C}_{21}\text{H}_{17}\text{BrFNO}_2\text{S}$ : 445.0147 ( $[\text{M}]^+$ ), found 445.0148.

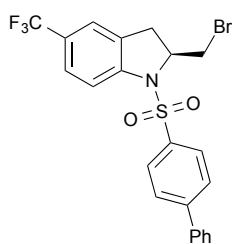

**6c:**  $[\alpha]^{27}_D +61.0$  ( $c = 0.94$ ,  $\text{CHCl}_3$ , 77:23 er); HPLC analysis: Daicel Chiralcel OD-3, hexane/2-propanol = 20:1, flow rate = 0.5 mL/min, 254 nm; retention time: 24.2 min (major) and 28.6 min (minor).  $^1\text{H}$  NMR (400 MHz,  $\text{CDCl}_3$ )  $\delta$  7.80–7.75 (m, 3H), 7.66 (td,  $J = 2.0, 8.8$  Hz, 2H), 7.57–7.39 (m, 6H), 7.35 (s, 1H), 4.59–4.53 (m, 1H), 3.86 (dd,  $J = 3.6, 10.0$  Hz, 1H), 3.51 (t,  $J = 10.0$  Hz, 1H), 3.13–3.01 (m, 2H);  $^{13}\text{C}$  NMR (100 MHz,  $\text{CDCl}_3$ )  $\delta$  146.7, 144.2, 138.7, 135.7, 131.0, 129.1, 128.8, 127.9, 127.5, 127.2, 127.0 (q,  $J = 32.9$  Hz), 125.7 (q,  $J = 4.1$  Hz), 124.0 (q,  $J = 270$  Hz), 122.6 (q,  $J = 3.3$  Hz), 115.9, 62.4, 35.8, 33.1; IR (neat): 1361, 1331, 1167, 1116, 671, 608  $\text{cm}^{-1}$ ; HRMS (FAB) calcd for  $\text{C}_{22}\text{H}_{17}\text{BrF}_3\text{NO}_2\text{S}$ : 495.0115 ( $[\text{M}]^+$ ), found 495.0117.

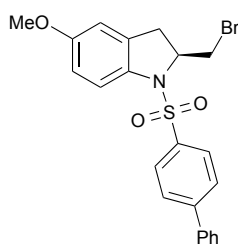

**6d:**  $[\alpha]^{18}_D +144.5$  ( $c = 0.99$ ,  $\text{CHCl}_3$ , 89:11 er); HPLC analysis: Daicel Chiralpak IC-3, hexane/2-propanol = 5:1, flow rate = 0.5 mL/min, 254 nm; retention time: 34.7 min (major) and 38.5 min (minor).  $^1\text{H}$  NMR (400 MHz,  $\text{CDCl}_3$ )  $\delta$  7.70 (d,  $J = 8.4$  Hz, 2H), 7.62–7.59 (m, 3H), 7.55 (d,  $J = 7.6$  Hz, 2H), 7.48–7.38 (m, 3H), 6.79 (dd,  $J = 2.4, 8.8$  Hz, 1H), 6.62 (d,  $J = 2.0$  Hz, 1H), 4.49–4.41 (m, 1H), 3.80 (dd,  $J = 3.6, 10.0$  Hz, 1H), 3.77 (s, 3H), 3.40 (t,  $J = 10.0$  Hz, 1H), 2.91–2.79 (m, 2H);  $^{13}\text{C}$  NMR (100 MHz,  $\text{CDCl}_3$ )  $\delta$  157.7, 146.0, 138.9, 135.6, 134.2, 132.6, 129.0, 128.6, 127.60, 127.56,

127.2, 118.2, 113.2, 110.9, 62.6, 55.6, 35.7, 33.3; IR (neat): 1487, 1354, 1166, 1031, 763, 673  $\text{cm}^{-1}$ ; HRMS (FAB) calcd for  $\text{C}_{22}\text{H}_{20}\text{BrNO}_3\text{S}$ : 457.0347 ( $[\text{M}]^+$ ), found 457.0347.

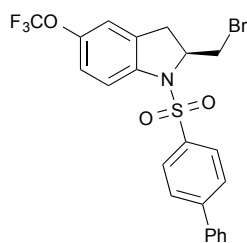

**6e**:  $[\alpha]_{\text{D}}^{28} +76.8$  ( $c = 0.97$ ,  $\text{CHCl}_3$ , 84:16 er); HPLC analysis: Daicel Chiralcel OD-3, hexane/2-propanol = 20:1, flow rate = 0.5 mL/min, 254 nm; retention time: 20.0 min (major) and 23.0 min (minor).  $^1\text{H}$  NMR (400 MHz,  $\text{CDCl}_3$ )  $\delta$  7.75 (d,  $J = 8.8$  Hz, 2H), 7.69 (d,  $J = 8.8$  Hz, 1H), 7.65 (d,  $J = 8.4$  Hz, 2H), 7.56 (d,  $J = 7.6$  Hz, 2H), 7.48–7.39 (m, 3H), 7.11 (d,  $J = 8.8$  Hz, 1H), 6.65 (s, 1H), 4.56–4.48 (m, 1H), 3.84 (dd,  $J = 3.6$ , 10.0 Hz, 1H), 3.47 (t,  $J = 10.0$  Hz, 1H), 2.99 (d,  $J = 6.4$  Hz, 2H);  $^{13}\text{C}$  NMR (100 MHz,  $\text{CDCl}_3$ )  $\delta$  146.5, 146.3 (q,  $J = 1.6$  Hz), 139.7, 138.8, 135.6, 132.4, 129.1, 128.7, 127.8, 127.5, 127.2, 120.9, 120.4 (q,  $J = 256$  Hz), 118.4, 117.3, 62.6, 35.7, 33.2;  $^{19}\text{F}$  NMR (376 MHz,  $\text{CDCl}_3$ )  $\delta$  -61.0; IR (neat): 1481, 1360, 1258, 1220, 1166, 763, 673, 607  $\text{cm}^{-1}$ ; HRMS (FAB) calcd for  $\text{C}_{22}\text{H}_{17}\text{BrF}_3\text{NO}_3\text{S}$ : 511.0065 ( $[\text{M}]^+$ ), found 511.0065.

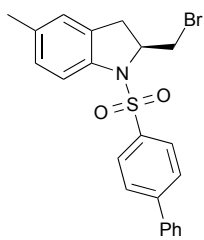

**6f**:  $[\alpha]_{\text{D}}^{21} +136.8$  ( $c = 0.99$ ,  $\text{CHCl}_3$ , 93: 7 er); HPLC analysis: Daicel Chiralcel OD-3, hexane/2-propanol = 50:1, flow rate = 0.5 mL/min, 254 nm; retention time: 24.4 min (major) and 27.3 min (minor).  $^1\text{H}$  NMR (400 MHz,  $\text{CDCl}_3$ )  $\delta$  7.73 (d,  $J = 8.4$  Hz, 2H), 7.62–7.53 (m, 5H), 7.47–7.37 (m, 3H), 7.05 (d,  $J = 8.0$  Hz, 1H), 6.89 (s, 1H), 4.49–4.42 (m, 1H), 3.83 (dd,  $J = 3.6$ , 10.0 Hz, 1H), 3.42 (t,  $J = 10.0$  Hz, 1H), 2.90 (d,  $J = 6.4$  Hz, 2H), 2.29 (s, 3H);  $^{13}\text{C}$  NMR (100 MHz,  $\text{CDCl}_3$ )  $\delta$  146.0, 138.9, 138.6, 135.9, 134.9, 130.7, 129.0, 128.62, 128.57, 127.59, 127.55, 127.2, 125.9, 116.7, 62.3, 35.9, 33.1, 21.0; IR (neat): 1486, 1356, 1167, 763, 673, 623  $\text{cm}^{-1}$ ; HRMS (FAB) calcd for  $\text{C}_{22}\text{H}_{20}\text{BrNO}_2\text{S}$ : 441.0398 ( $[\text{M}]^+$ ), found 441.0401.

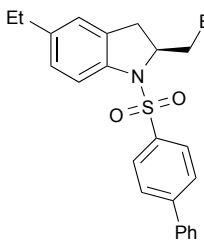

**6g**:  $[\alpha]_{\text{D}}^{28} +126.2$  ( $c = 0.99$ ,  $\text{CHCl}_3$ , 92: 8 er); HPLC analysis: Daicel Chiralcel OD-3, hexane/2-propanol = 20:1, flow rate = 0.5 mL/min, 254 nm; retention time: 17.4 min (major) and 19.8 min (minor).  $^1\text{H}$  NMR (400 MHz,  $\text{CDCl}_3$ )  $\delta$  7.74 (td,  $J = 2.0$ , 8.8 Hz, 2H), 7.62–7.52 (m, 5H), 7.47–7.37 (m, 3H), 7.07 (d,  $J = 8.4$  Hz, 1H), 6.91 (s, 1H), 4.50–4.42 (m, 1H), 3.83 (dd,  $J = 4.0$ , 9.6 Hz, 1H), 3.42 (t,  $J = 10.0$  Hz, 1H), 2.92 (d,  $J =$

6.0 Hz, 2H), 2.58 (q,  $J = 8.0$  Hz, 2H), 1.20 (t,  $J = 8.0$  Hz, 3H);  $^{13}\text{C}$  NMR (100 MHz,  $\text{CDCl}_3$ )  $\delta$  146.0, 141.4, 138.9, 138.7, 135.9, 130.7, 129.0, 128.6, 127.60, 127.57, 127.50, 127.2, 124.7, 116.7, 62.4, 35.9, 33.2, 28.3, 15.6; IR (neat): 1484, 1355, 1166, 763, 672, 622  $\text{cm}^{-1}$ ; HRMS (FAB) calcd for  $\text{C}_{23}\text{H}_{22}\text{BrNO}_2\text{S}$ : 455.0555 ( $[\text{M}]^+$ ), found 455.0555.

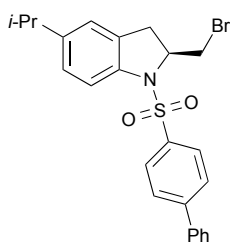

**6h**:  $[\alpha]^{22}_{\text{D}} +109.8$  ( $c = 0.99$ ,  $\text{CHCl}_3$ , 87:13 er); HPLC analysis: Daicel Chiralcel OD-3, hexane/2-propanol = 20:1, flow rate = 0.5 mL/min, 254 nm; retention time: 16.4 min (major) and 18.1 min (minor).  $^1\text{H}$  NMR (400 MHz,  $\text{CDCl}_3$ )  $\delta$  7.74 (td,  $J = 2.0, 8.0$  Hz, 2H), 7.63–7.52 (m, 5H), 7.47–7.37 (m, 3H), 7.09 (dd,  $J = 1.2, 8.0$  Hz, 1H), 6.94 (d,  $J = 0.8$  Hz, 1H), 4.50–4.42 (m, 1H), 3.85 (dd,  $J = 4.0, 9.6$  Hz, 1H), 3.42 (t,  $J = 9.6$  Hz, 1H), 2.93 (d,  $J = 6.0$  Hz, 2H), 2.85 (septet,  $J = 6.8$  Hz, 1H), 1.21 (d,  $J = 7.2$  Hz, 3H), 1.20 (d,  $J = 6.8$  Hz, 3H);  $^{13}\text{C}$  NMR (100 MHz,  $\text{CDCl}_3$ )  $\delta$  146.03, 146.00, 138.9, 138.7, 136.0, 130.5, 129.0, 128.6, 127.6, 127.2, 126.2, 123.2, 116.5, 62.4, 35.8, 33.6, 33.2, 24.1, 24.0; IR (neat): 2959, 1486, 1355, 1165, 1094, 763, 729, 671, 620  $\text{cm}^{-1}$ ; HRMS (FAB) calcd for  $\text{C}_{24}\text{H}_{24}\text{BrNO}_2\text{S}$ : 469.0711 ( $[\text{M}]^+$ ), found 469.0711.

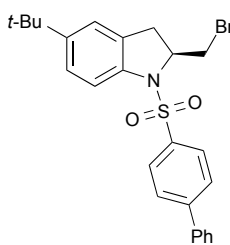

**6i**:  $[\alpha]^{22}_{\text{D}} +132.8$  ( $c = 1.0$ ,  $\text{CHCl}_3$ , 93: 7 er); HPLC analysis: Daicel Chiralcel OD-3, hexane/2-propanol = 20:1, flow rate = 0.5 mL/min, 254 nm; retention time: 14.8 min (major) and 17.4 min (minor).  $^1\text{H}$  NMR (400 MHz,  $\text{CDCl}_3$ )  $\delta$  7.75 (d,  $J = 8.4$  Hz, 2H), 7.63–7.53 (m, 5H), 7.48–7.37 (m, 3H), 7.28–7.24 (m, 1H), 7.09 (d,  $J = 0.8$  Hz, 1H), 4.50–4.43 (m, 1H), 3.86 (dd,  $J = 3.6, 9.6$  Hz, 1H), 3.42 (t,  $J = 9.6$  Hz, 1H), 2.95 (d,  $J = 6.0$  Hz, 2H), 1.28 (s, 9H);  $^{13}\text{C}$  NMR (100 MHz,  $\text{CDCl}_3$ )  $\delta$  148.3, 146.0, 138.9, 138.4, 136.0, 130.1, 129.0, 128.6, 127.6, 127.2, 125.0, 122.3, 116.1, 62.4, 35.8, 34.5, 33.4, 31.4; IR (neat): 2962, 1489, 1357, 1168, 763, 672, 617  $\text{cm}^{-1}$ ; HRMS (FAB) calcd for  $\text{C}_{25}\text{H}_{26}\text{BrNO}_2\text{S}$ : 483.0868 ( $[\text{M}]^+$ ), found 483.0867.

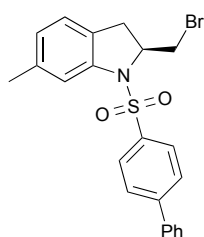

**6j**:  $[\alpha]^{19}_{\text{D}} +84.9$  ( $c = 0.96$ ,  $\text{CHCl}_3$ , 73:27 er); HPLC analysis: Daicel Chiralcel OD-3, hexane/2-propanol = 20:1, flow rate = 0.5 mL/min, 254 nm; retention time: 17.6 min (major) and 19.7 min (minor).  $^1\text{H}$  NMR (400 MHz,  $\text{CDCl}_3$ )  $\delta$  7.75 (d,  $J = 8.4$  Hz, 2H), 7.62 (d,  $J = 8.4$



Hz, 2H), 7.57–7.53 (m, 3H), 7.47–7.38 (m, 3H), 6.96 (d,  $J = 7.6$  Hz, 1H), 6.88 (d,  $J = 8.0$  Hz, 1H), 4.50–4.43 (m, 1H), 3.82 (dd,  $J = 4.0, 10.0$  Hz, 1H), 3.42 (t,  $J = 10.0$  Hz, 1H), 2.90 (d,  $J = 6.0$  Hz, 2H), 2.39 (s, 3H);  $^{13}\text{C}$  NMR (100 MHz,  $\text{CDCl}_3$ )  $\delta$  146.1, 141.1, 138.9, 138.1, 136.0, 129.0, 128.6, 127.63, 127.59, 127.50, 127.2, 125.9, 124.9, 117.4, 62.5, 35.9, 32.9, 21.6; IR (neat): 1355, 1166, 763, 672, 606  $\text{cm}^{-1}$ ; HRMS (FAB) calcd for  $\text{C}_{22}\text{H}_{20}\text{BrNO}_2\text{S}$ : 441.0398 ( $[\text{M}]^+$ ), found 441.0396.

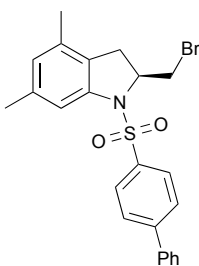

**6k**:  $[\alpha]_{\text{D}}^{22} +79.5$  ( $c = 1.0$ ,  $\text{CHCl}_3$ , 75:25 er); HPLC analysis: Daicel Chiralpak IE-3, hexane/2-propanol = 20:1, flow rate = 0.5 mL/min, 254 nm; retention time: 48.2 min (major) and 52.7 min (minor).  $^1\text{H}$  NMR (400 MHz,  $\text{CDCl}_3$ )  $\delta$  7.76 (d,  $J = 8.0$  Hz, 2H), 7.62 (d,  $J = 8.4$  Hz, 2H), 7.56 (d,  $J = 8.4$  Hz, 2H), 7.48–7.36 (m, 4H), 6.71 (s, 1H), 4.51–4.44 (m, 1H), 3.86 (dd,  $J = 3.6, 10.0$  Hz, 1H), 3.43 (t,  $J = 10.0$  Hz, 1H), 2.83 (d,  $J = 6.0$  Hz, 2H), 2.35 (s, 3H), 2.10 (s, 3H);  $^{13}\text{C}$  NMR (100 MHz,  $\text{CDCl}_3$ )  $\delta$  146.0, 140.8, 139.0, 138.2, 136.0, 134.4, 129.0, 128.6, 127.61, 127.55, 127.2, 126.8, 126.2, 114.5, 62.4, 36.3, 32.0, 21.5, 18.6; IR (neat): 1355, 1167, 1096, 763, 724, 672, 610  $\text{cm}^{-1}$ ; HRMS (FAB) calcd for  $\text{C}_{23}\text{H}_{22}\text{BrNO}_2\text{S}$ : 455.0555 ( $[\text{M}]^+$ ), found 455.0554.

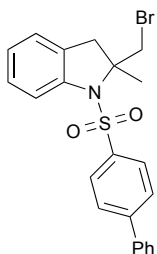

**8**:  $[\alpha]_{\text{D}}^{26} +12.8$  ( $c = 1.0$ ,  $\text{CHCl}_3$ , 61:39 er); HPLC analysis: Daicel Chiralpak AD-3, hexane/2-propanol = 20:1, flow rate = 0.5 mL/min, 254 nm; retention time: 33.8 min (minor) and 37.6 min (major).  $^1\text{H}$  NMR (400 MHz,  $\text{CDCl}_3$ )  $\delta$  8.02 (td,  $J = 1.6, 8.0$  Hz, 2H), 7.67 (td,  $J = 2.0, 8.4$  Hz, 2H), 7.57 (d,  $J = 7.2$  Hz, 2H), 7.51–7.38 (m, 4H), 7.19–7.13 (m, 2H), 6.99 (t,  $J = 7.6$  Hz, 1H), 3.99 (d,  $J = 10.4$  Hz, 1H), 3.95 (d,  $J = 10.0$  Hz, 1H), 3.53 (d,  $J = 16.4$  Hz, 1H), 2.95 (d,  $J = 16.8$  Hz, 1H), 1.83 (s, 3H);  $^{13}\text{C}$  NMR (100 MHz,  $\text{CDCl}_3$ )  $\delta$  145.9, 141.7, 139.9, 139.1, 129.0, 128.5, 127.9, 127.7, 127.5, 127.3, 127.2, 125.1, 123.3, 114.0, 71.6, 42.6, 40.8, 24.5; IR (neat): 1479, 1351, 1337, 1164, 996, 762, 751, 692  $\text{cm}^{-1}$ ; HRMS (FAB) calcd for  $\text{C}_{22}\text{H}_{20}\text{BrNO}_2\text{S}$ : 441.0398 ( $[\text{M}]^+$ ), found 441.0397.

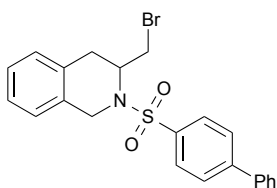

**10**:  $[\alpha]_{\text{D}}^{29} -9.6$  ( $c = 0.80$ ,  $\text{CHCl}_3$ , 67:33 er); HPLC analysis: Daicel Chiralpak IE-3, hexane/2-propanol = 2:1, flow rate = 0.5 mL/min, 254 nm; retention time: 27.3 min (major) and 34.0 min

(minor).  $^1\text{H}$  NMR (400 MHz,  $\text{CDCl}_3$ )  $\delta$  7.86 (d,  $J = 8.0$  Hz, 2H), 7.65 (d,  $J = 8.4$  Hz, 2H), 7.57 (d,  $J = 7.2$  Hz, 2H), 7.50–7.39 (m, 3H), 7.20–7.14 (m, 2H), 7.11–7.06 (m, 2H), 4.48 (d,  $J = 15.2$  Hz, 1H), 4.41 (d,  $J = 15.2$  Hz, 1H), 4.41–4.34 (m, 1H), 3.54 (dd,  $J = 4.0, 10.0$  Hz, 1H), 3.17 (t,  $J = 9.6$  Hz, 1H), 3.06 (dd,  $J = 4.0, 15.6$  Hz, 1H), 2.84 (dd,  $J = 6.0, 15.6$  Hz, 1H);  $^{13}\text{C}$  NMR (100 MHz,  $\text{CDCl}_3$ )  $\delta$  145.8, 139.1, 137.2, 132.0, 131.9, 129.0, 128.9, 128.5, 127.7, 127.6, 127.3, 126.8, 126.1, 53.7, 45.0, 33.5, 30.8; IR (neat): 1335, 1158, 1093, 1030, 911, 722, 670  $\text{cm}^{-1}$ ; HRMS (FAB) calcd for  $\text{C}_{22}\text{H}_{21}\text{BrNO}_2\text{S}$ : 442.0476 ( $[\text{M}+\text{H}]^+$ ), found 442.0476.

## 5. Transformations of product **3g**.

To a solution of bromoaminocyclization product **3g** (0.10 mmol) in toluene (2 mL) was added 2,2'-azobis(isobutyronitrile) (AIBN) (0.030 mmol) and tributyltin hydride (0.25 mmol). The reaction mixture was warmed to 80  $^\circ\text{C}$  and stirred for 16 h. After 16 h, the reaction mixture was cooled to room temperature and quenched with saturated aqueous  $\text{NaHCO}_3$  (10 mL). The organic materials were extracted with ethyl acetate for three times (5 mL  $\times$  3). The combined extracts were dried over  $\text{Na}_2\text{SO}_4$  and concentrated. The residue was purified by flash column chromatography on silica gel (hexane/ethyl acetate = 50:1–10:1 as eluent) to give product **11**.

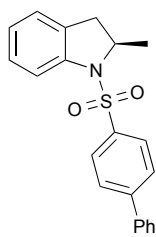

**11**:  $[\alpha]_D^{27} +221.5$  ( $c = 1.1$ ,  $\text{CHCl}_3$ , 95: 5  $\text{er}$ ); HPLC analysis: Daicel Chiralpak IC-3, hexane/2-propanol = 5:1, flow rate = 0.5 mL/min, 254 nm; retention time: 35.0 min (major) and 38.2 min (minor).  $^1\text{H}$  NMR (400 MHz,  $\text{CDCl}_3$ )  $\delta$  7.75–7.68 (m, 3H), 7.60–7.52 (m, 4H), 7.47–7.36 (m, 3H), 7.26–7.21 (m, 1H), 7.08–7.01 (m, 2H), 4.44–4.36 (m, 1H), 2.95 (dd,  $J = 10.0, 16.4$  Hz, 1H), 2.47 (dd,  $J = 2.4, 16.4$  Hz, 1H), 1.46 (d,  $J = 6.0$  Hz, 3H);  $^{13}\text{C}$  NMR (100 MHz,  $\text{CDCl}_3$ )  $\delta$  145.6, 140.9, 139.1, 136.8, 131.6, 129.0, 128.5, 127.7, 127.43, 127.41, 127.2, 125.3, 124.5, 117.1, 58.5, 36.2, 23.4; IR (neat): 1350, 1165, 1093, 1023, 759, 723, 696, 670  $\text{cm}^{-1}$ ; HRMS (FAB) calcd for  $\text{C}_{21}\text{H}_{19}\text{NO}_2\text{S}$ : 349.1136 ( $[\text{M}]^+$ ), found 349.1138.

To a mixture of **11** (0.050 mmol) and magnesium powder (0.50 mmol) in THF

(1 mL) was added titanium(IV) isopropoxide (0.15 mmol) and trimethylsilyl chloride (0.25 mmol) under nitrogen atmosphere. The reaction mixture was warmed to 50 °C and stirred for 17 h. After 17 h, the reaction mixture was cooled to room temperature and quenched with 1M aqueous NaOH (2 mL). The resulting mixture was stirred for 30 min at room temperature. The resulting mixture was diluted with ethyl acetate and filtered over celite. The filtrate was diluted with water. The solution was extracted with ethyl acetate (5 mL × 3). The combined extracts were dried over Na<sub>2</sub>SO<sub>4</sub> and concentrated. The residue was purified by flash column chromatography on silica gel (hexane/ethyl acetate = 30:1–5:1 as eluent) to give product **12**.

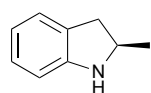

**12**:<sup>4d,5</sup>  $[\alpha]_{\text{D}}^{26} +14.2$  ( $c = 0.14$ , benzene, 95: 5 er); HPLC analysis: Daicel Chiralcel OD-3, hexane/2-propanol = 20:1, flow rate = 0.5 mL/min, 254 nm; retention time: 14.0 min (major) and 15.8 min (minor). <sup>1</sup>H NMR (400 MHz, CDCl<sub>3</sub>)  $\delta$  7.08 (d,  $J = 7.2$  Hz, 1H), 7.02 (t,  $J = 7.2$  Hz, 1H), 6.71 (t,  $J = 7.2$  Hz, 1H), 6.64 (d,  $J = 7.6$  Hz, 1H), 4.06–3.96 (m, 1H), 3.15 (dd,  $J = 8.8, 15.2$  Hz, 1H), 2.65 (dd,  $J = 8.0, 15.2$  Hz, 1H), 1.31 (d,  $J = 6.0$  Hz, 3H); <sup>13</sup>C NMR (100 MHz, CDCl<sub>3</sub>)  $\delta$  150.9, 128.8, 127.1, 124.6, 118.4, 109.1, 55.1, 37.7, 22.2; IR (neat): 3369, 2961, 1608, 1484, 1466, 1246, 744, 713 cm<sup>-1</sup>.

To a solution of bromoaminocyclization product **3g** (0.10 mmol) in DMF (2 mL) was added NaN<sub>3</sub> (0.30 mmol). The reaction mixture was warmed to 60 °C and stirred for 17 h. After 17 h, the reaction mixture was cooled to room temperature and quenched with water (20 mL). The organic materials were extracted with ethyl acetate for three times (10 mL × 3). The combined extracts were dried over Na<sub>2</sub>SO<sub>4</sub> and concentrated. The residue was purified by flash column chromatography on silica gel (hexane/ethyl acetate = 50:1–5:1 as eluent) to give product **13**.

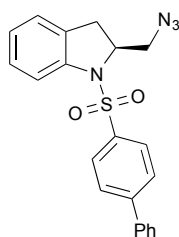

**13**:  $[\alpha]_{\text{D}}^{27} +164.7$  ( $c = 1.0$ , CHCl<sub>3</sub>, 95: 5 er); HPLC analysis: Daicel Chiralcel OD-3, hexane/2-propanol = 20:1, flow rate = 0.5 mL/min, 254 nm; retention time: 28.5 min (major) and 34.8 min (minor). <sup>1</sup>H NMR (400 MHz, CDCl<sub>3</sub>)  $\delta$  7.74–7.71 (m, 3H), 7.60 (d,  $J = 8.8$  Hz, 2H), 7.54 (d,  $J =$

7.6 Hz, 2H), 7.47–7.37 (m, 3H), 7.29–7.22 (m, 1H), 7.10–7.04 (m, 2H), 4.41–4.35 (m, 1H), 3.65 (dd,  $J = 4.4, 12.4$  Hz, 1H), 3.55 (dd,  $J = 7.2, 12.4$  Hz, 1H), 2.89 (dd,  $J = 9.6, 16.4$  Hz, 1H), 2.75 (dd,  $J = 3.2, 16.4$  Hz, 1H);  $^{13}\text{C}$  NMR (100 MHz,  $\text{CDCl}_3$ )  $\delta$  146.1, 141.1, 138.9, 136.0, 131.1, 129.0, 128.6, 128.0, 127.6, 127.5, 127.2, 125.22, 125.16, 117.2, 61.0, 55.2, 32.1; IR (neat): 2101, 1479, 1354, 1166, 1095, 761, 672  $\text{cm}^{-1}$ ; HRMS (FAB) calcd for  $\text{C}_{21}\text{H}_{19}\text{N}_4\text{O}_2\text{S}$ : 391.1229 ( $[\text{M}+\text{H}]^+$ ), found 391.1229.

To a solution of bromoaminocyclization product **3g** (0.10 mmol) in  $\text{CH}_3\text{CN}$  (1 mL) was added  $\text{K}_2\text{CO}_3$  (0.20 mmol) and thiophenol (0.30 mmol). The reaction mixture was warmed to 75 °C and stirred for 24 h. After 24 h, the reaction mixture was cooled to room temperature and quenched with saturated aqueous  $\text{NH}_4\text{Cl}$  (5 mL). The organic materials were extracted with ethyl acetate for three times (5 mL  $\times$  3). The combined extracts were dried over  $\text{Na}_2\text{SO}_4$  and concentrated. The residue was purified by flash column chromatography on silica gel (hexane/ethyl acetate = 50:1–5:1 as eluent) to give product **14**.

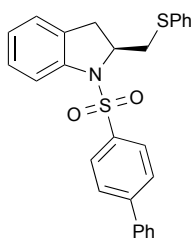

**14**:  $[\alpha]_D^{27} -32.3$  ( $c = 0.60, \text{CHCl}_3, 95: 5$  er); HPLC analysis: Daicel Chiralpak IC-3, hexane/2-propanol = 5:1, flow rate = 0.5 mL/min, 254 nm; retention time: 22.3 min (major) and 25.2 min (minor).  $^1\text{H}$  NMR (400 MHz,  $\text{CDCl}_3$ )  $\delta$  7.70 (d,  $J = 8.0$  Hz, 1H), 7.59 (d,  $J = 8.8$  Hz, 2H), 7.54–7.35 (m, 11H), 7.28–7.21 (m, 2H), 7.08–7.02 (m, 2H), 4.34–4.27 (m, 1H), 3.75 (dd,  $J = 3.6, 13.6$  Hz, 1H), 2.97–2.84 (m, 3H);  $^{13}\text{C}$  NMR (100 MHz,  $\text{CDCl}_3$ )  $\delta$  145.9, 141.1, 138.9, 136.0, 134.8, 131.0, 129.11, 129.02, 128.98, 128.5, 127.9, 127.50, 127.42, 127.2, 126.2, 125.4, 124.9, 117.0, 60.8, 38.5, 33.3; IR (neat): 1478, 1354, 1165, 1093, 1024, 760, 740, 693, 670  $\text{cm}^{-1}$ ; HRMS (FAB) calcd for  $\text{C}_{27}\text{H}_{24}\text{NO}_2\text{S}_2$ : 458.1248 ( $[\text{M}+\text{H}]^+$ ), found 458.1249.

To a solution of bromoaminocyclization product **3g** (0.050 mmol) in DMF (2.5 mL) was added KOAc (0.20 mmol) and 18-crown-6 ether (0.10 mmol). The reaction mixture was warmed to 50 °C and stirred for 7 h. After 7 h, the reaction mixture was

cooled to room temperature and quenched with water (20 mL). The organic materials were extracted with ethyl acetate for three times (10 mL  $\times$  3). The combined extracts were dried over Na<sub>2</sub>SO<sub>4</sub> and concentrated. The residue was purified by flash column chromatography on silica gel (hexane/ethyl acetate = 30:1–3:1 as eluent) to give product **15**.

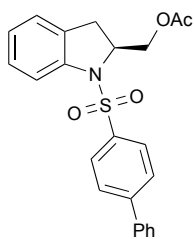

**15**: [ $\alpha$ ]<sub>D</sub><sup>26</sup> +191.2 ( $c$  = 0.93, CHCl<sub>3</sub>, 95: 5 er); HPLC analysis: Daicel Chiralcel OD-3, hexane/2-propanol = 10:1, flow rate = 0.5 mL/min, 254 nm; retention time: 31.3 min (major) and 33.9 min (minor). <sup>1</sup>H NMR (400 MHz, CDCl<sub>3</sub>)  $\delta$  7.73–7.68 (m, 3H), 7.58 (td,  $J$  = 1.6, 8.8 Hz, 2H), 7.55–7.52 (m, 2H), 7.47–7.37 (m, 3H), 7.28–7.22 (m, 1H), 7.06 (d,  $J$  = 4.0 Hz, 2H), 4.60–4.53 (m, 1H), 4.22 (dd,  $J$  = 6.4, 11.2 Hz, 1H), 4.17 (dd,  $J$  = 6.4, 11.2 Hz, 1H), 2.82 (dd,  $J$  = 10.0, 16.4 Hz, 1H), 2.60 (dd,  $J$  = 2.4, 16.4 Hz, 1H), 2.07 (s, 3H); <sup>13</sup>C NMR (100 MHz, CDCl<sub>3</sub>)  $\delta$  171.0, 145.9, 141.1, 138.9, 136.3, 131.5, 129.0, 128.6, 128.0, 127.5, 127.2, 125.1, 117.8, 65.7, 60.1, 31.5, 20.8; IR (neat): 1739, 1478, 1354, 1229, 1165, 1096, 1044, 761, 671 cm<sup>-1</sup>; HRMS (FAB) calcd for C<sub>23</sub>H<sub>22</sub>NO<sub>4</sub>S: 408.1270 ([M+H]<sup>+</sup>), found 408.1270.

## 6. Determination of the absolute configuration of products.

The absolute configurations of products **3a**,<sup>4d</sup> **3d**,<sup>4d</sup> and **12**<sup>4d,5</sup> were confirmed by comparison of an optical rotation value with the literature.<sup>4d,5</sup>

## References

- 1 Gaussian 09, Revision D.01, M. J. Frisch, G. W. Trucks, H. B. Schlegel, G. E. Scuseria, M. A. Robb, J. R. Cheeseman, G. Scalmani, V. Barone, B. Mennucci, G. A. Petersson, H. Nakatsuji, M. Caricato, X. Li, H. P. Hratchian, A. F. Izmaylov, J. Bloino, G. Zheng, J. L. Sonnenberg, M. Hada, M. Ehara, K. Toyota, R. Fukuda, J. Hasegawa, M. Ishida, T. Nakajima, Y. Honda, O. Kitao, H. Nakai, T. Vreven, J. A. Montgomery Jr., J. E. Peralta, F. Ogliaro, M. Bearpark, J. J. Heyd, E. Brothers, K. N. Kudin, V. N. Staroverov, T. Keith, R. Kobayashi, J. Normand, K. Raghavachari, A. Rendell, J. C. Burant, S. S. Iyengar, J. Tomasi, M. Cossi, N. Rega, J. M. Millam, M. Klene, J. E. Knox, J. B. Cross, V. Bakken, C. Adamo, J. Jaramillo, R. Gomperts, R. E. Stratmann, O. Yazyev, A. J. Austin, R. Cammi, C. Pomelli, J. W. Ochterski, R. L. Martin, K. Morokuma, V. G. Zakrzewski, G. A. Voth, P. Salvador, J. J. Dannenberg, S. Dapprich, A. D. Daniels, O. Farkas, J. B. Foresman, J. V. Ortiz, J. Cioslowski and D. J. Fox, Gaussian, Inc., Wallingford CT, **2013**.
- 2 CYLview, 1.0b, C. Y. Legault, Université de Sherbrooke, **2009**.
- 3 R. Nishiyori, A. Tsuchihashi, A. Mochizuki, K. Kaneko, M. Yamanaka and S. Shirakawa, *Chem. – Eur. J.*, 2018, **24**, 16747–16752.
- 4 (a) K. C. Nicolaou, A. J. Roecker, J. A. Pfefferkorn and G.-Q. Cao, *J. Am. Chem. Soc.*, 2002, **122**, 2966–2967; (b) M. T. Bovino and S. R. Chemler, *Angew. Chem., Int. Ed.*, 2012, **51**, 3923–3927; (c) P. Mizar, A. Burrelli, E. Günther, M. Söftje, U. Farooq and T. Wirth, *Chem. – Eur. J.*, 2014, **20**, 13113–13116; (d) S.-N. Yu, Y.-L. Li and J. Deng, *Adv. Synth. Catal.*, 2017, **359**, 2499–2508; (e) S.-P. Jiang, M. Zhang, C.-Y. Wang, S. Yang and G.-W. Wang, *Org. Lett.*, 2017, **19**, 5110–5113.
- 5 (a) V. P. Krasnov, G. L. Levit, I. M. Bukrina, I. N. Andreeva, L. S. Sadretdinova, M. A. Korolyova, M. I. Kodess, V. N. Charushin and O. N. Chupakhin, *Tetrahedron: Asymmetry*, 2003, **14**, 1985–1988; (b) F. O. Arp and G. C. Fu, *J. Am. Chem. Soc.*, 2006, **128**, 14264–14265; (c) D.-S. Wang, Q.-A. Chen, W. Li, C.-B. Yu, Y.-G. Zhou and X. Zhang, *J. Am. Chem. Soc.*, 2010, **132**, 8909–8911; (d) B. W. Turnpenny, K. L. Hyman and S. R. Chemler, *Organometallics*, 2012, **31**, 7819–7822.

# NMR Charts

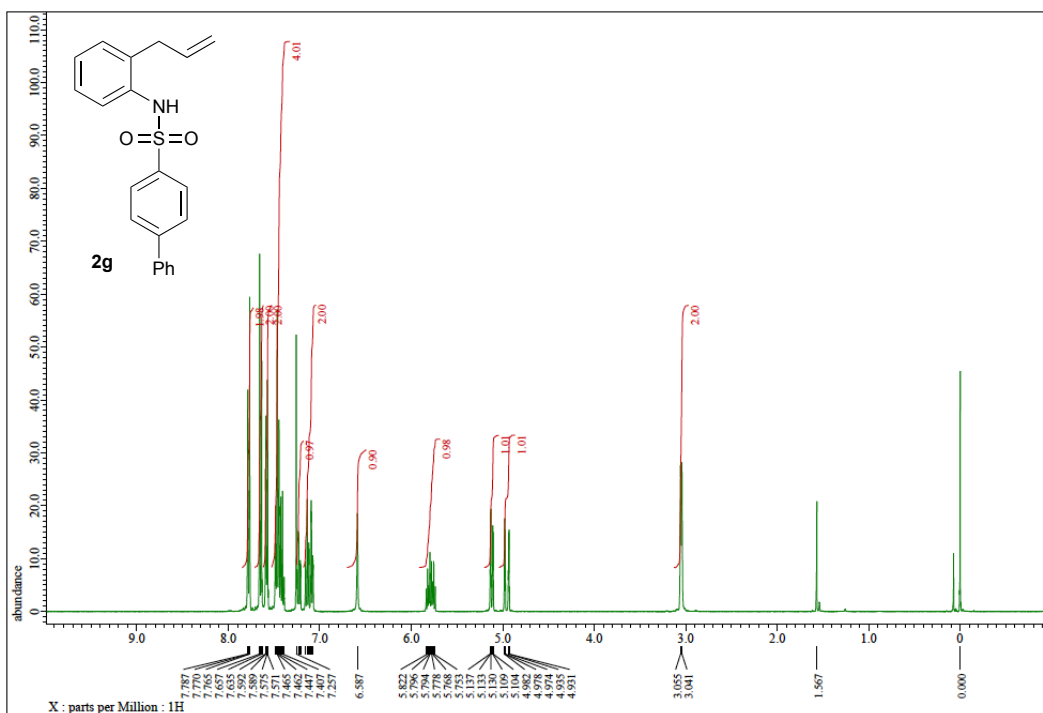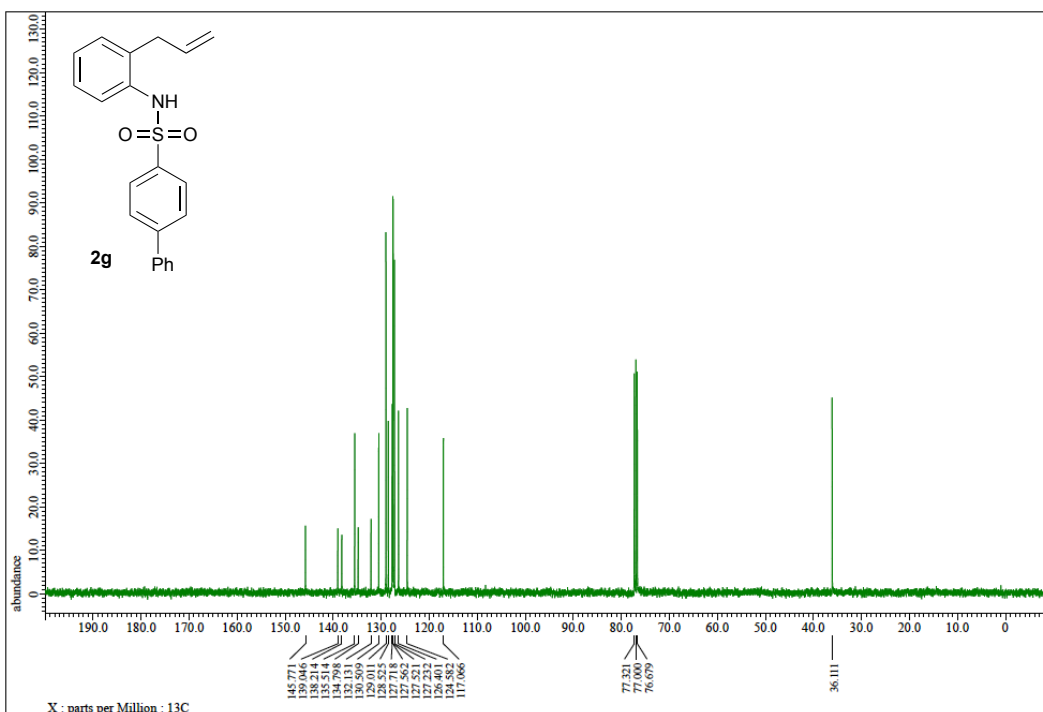

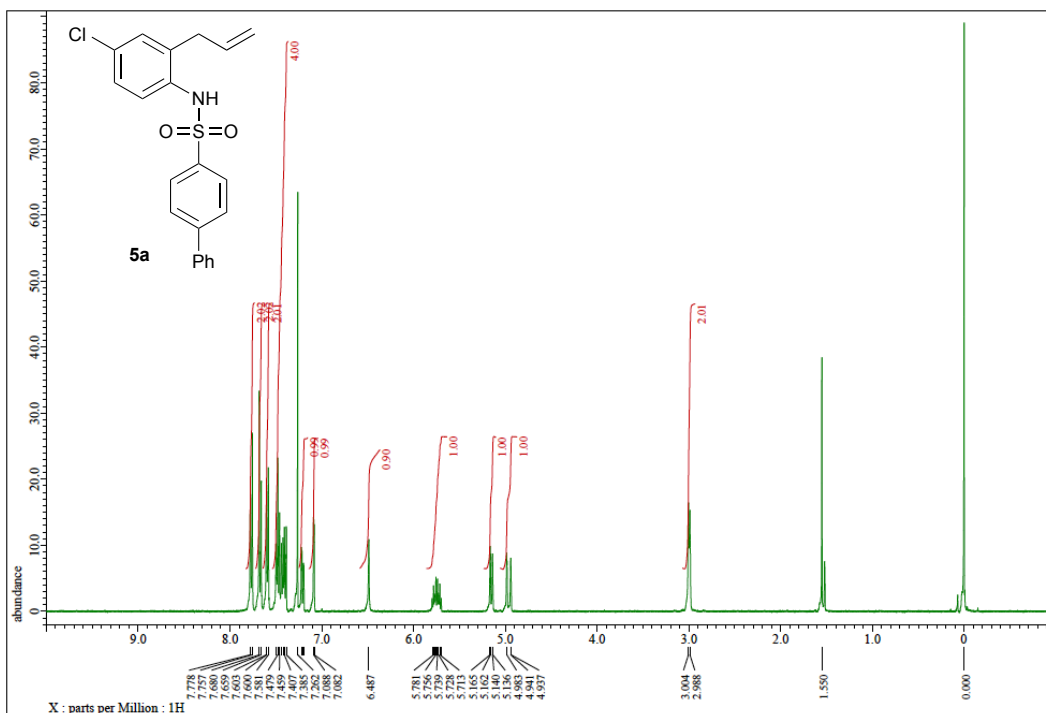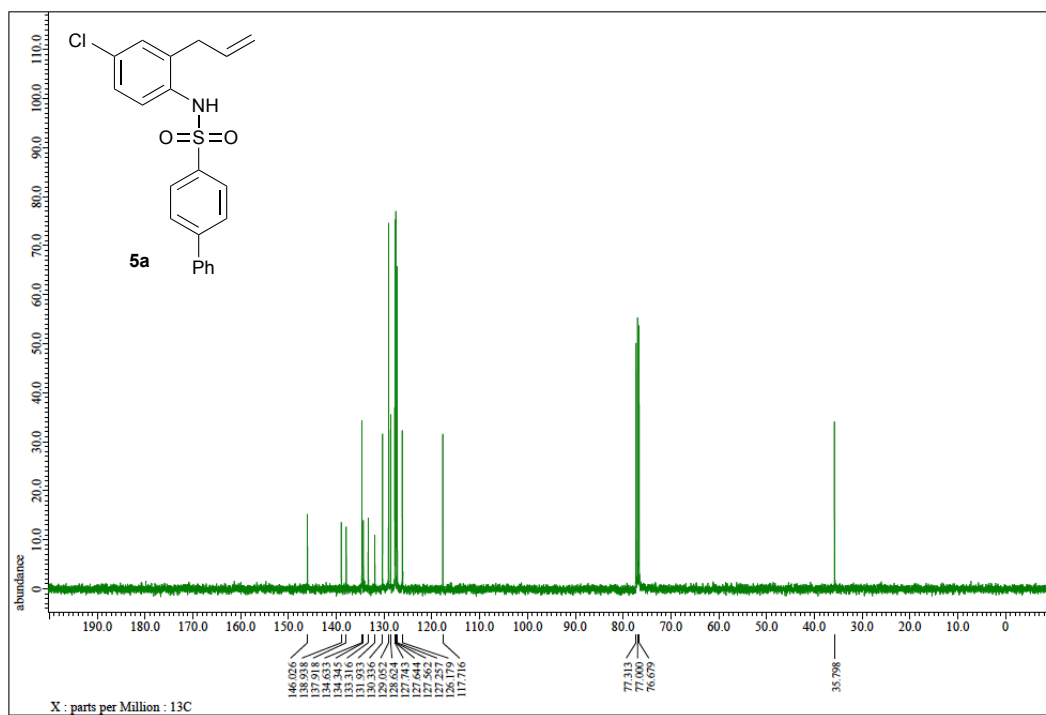



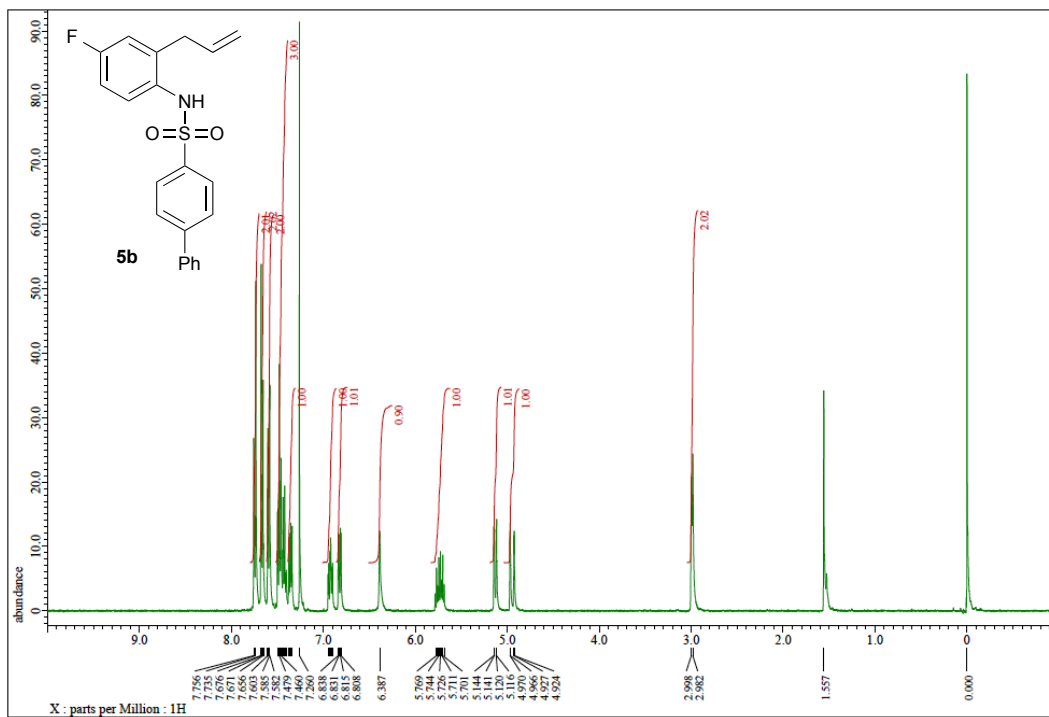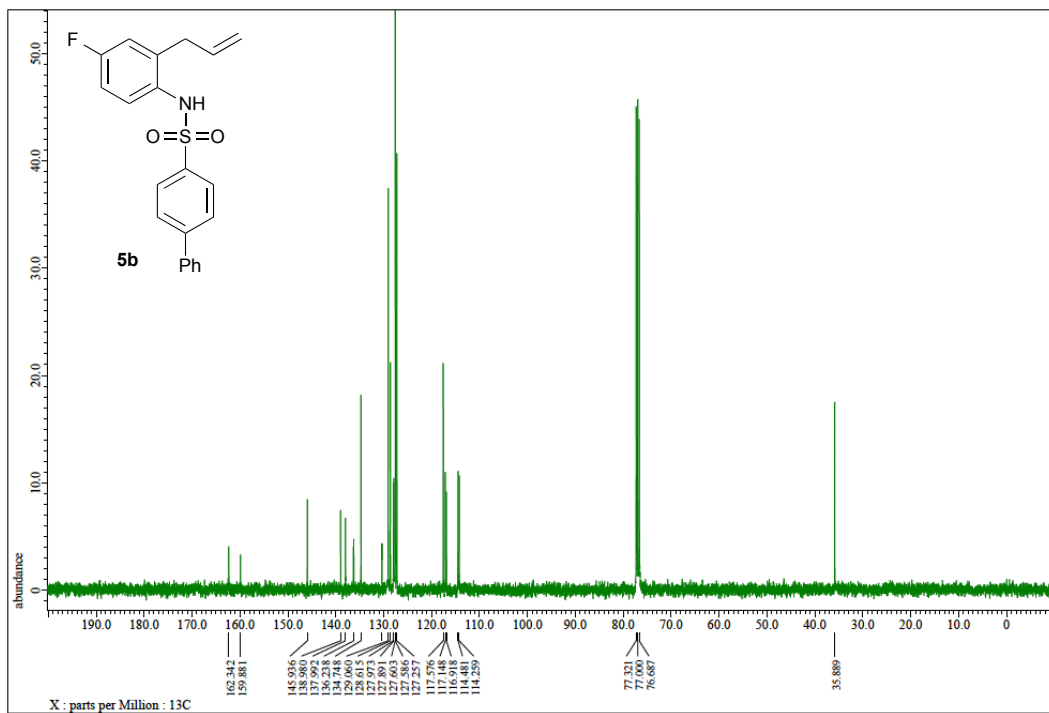

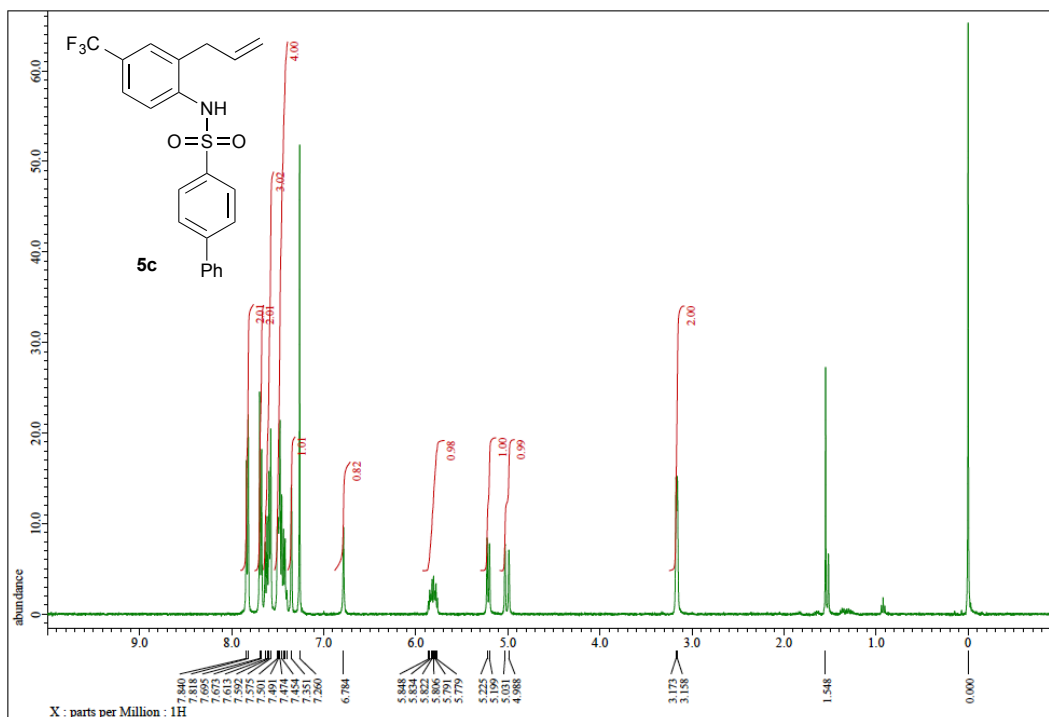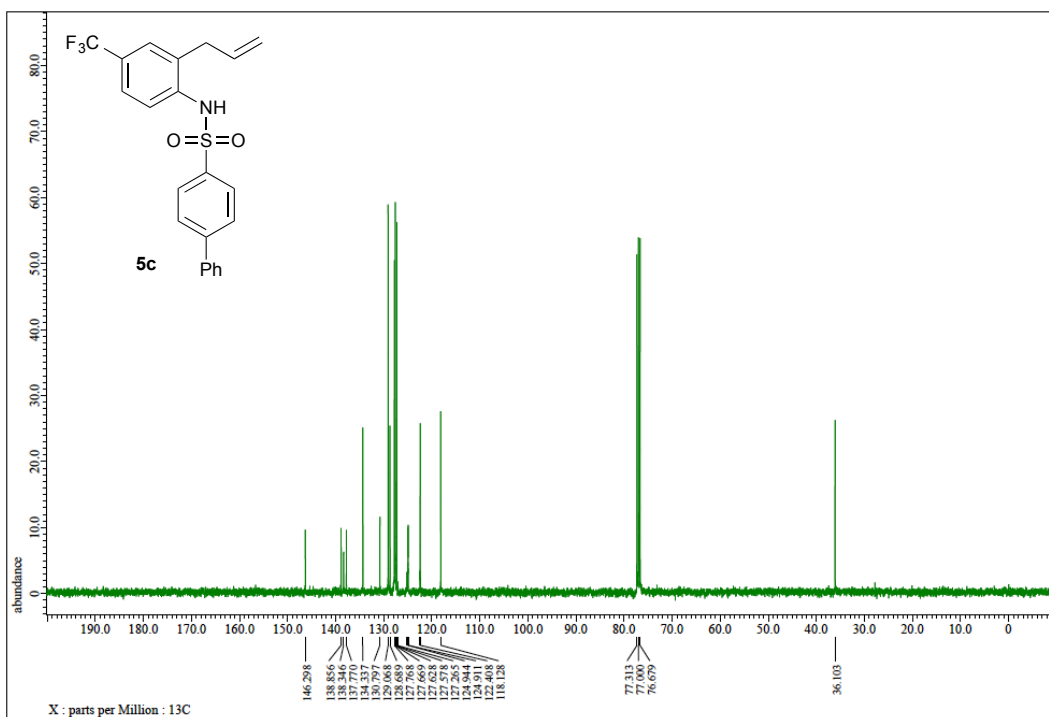

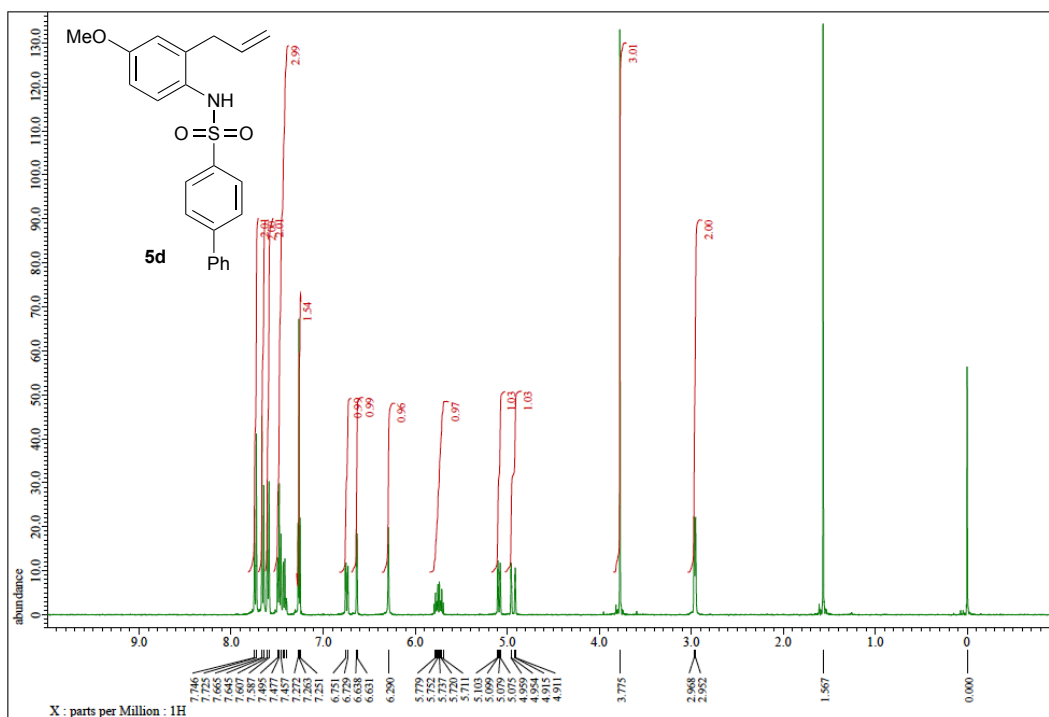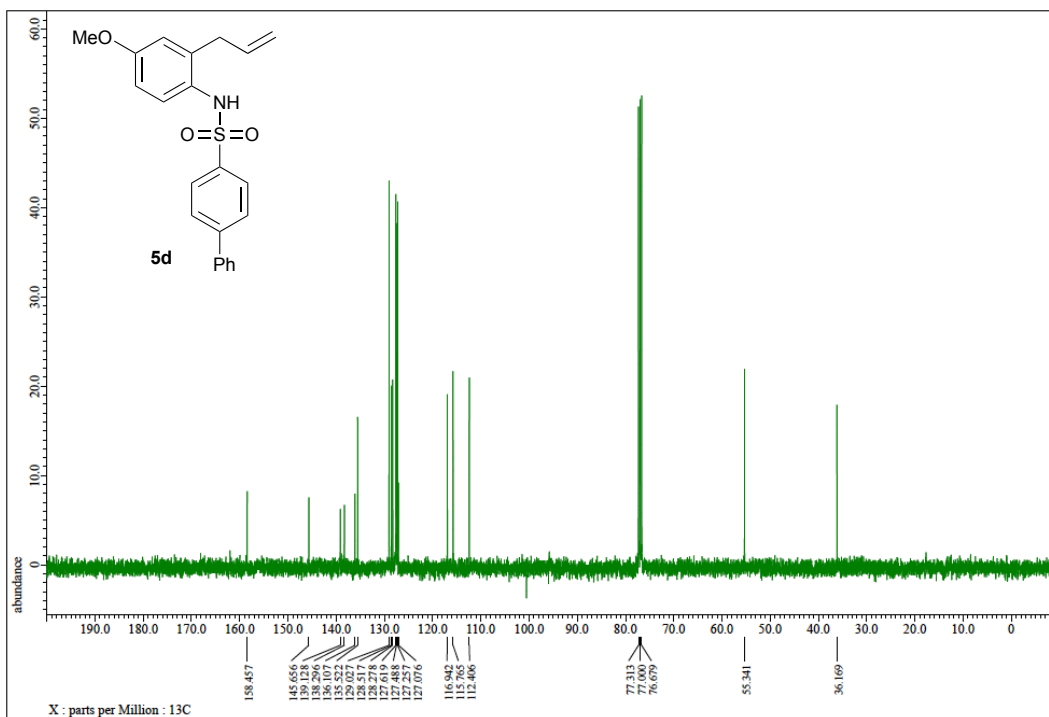

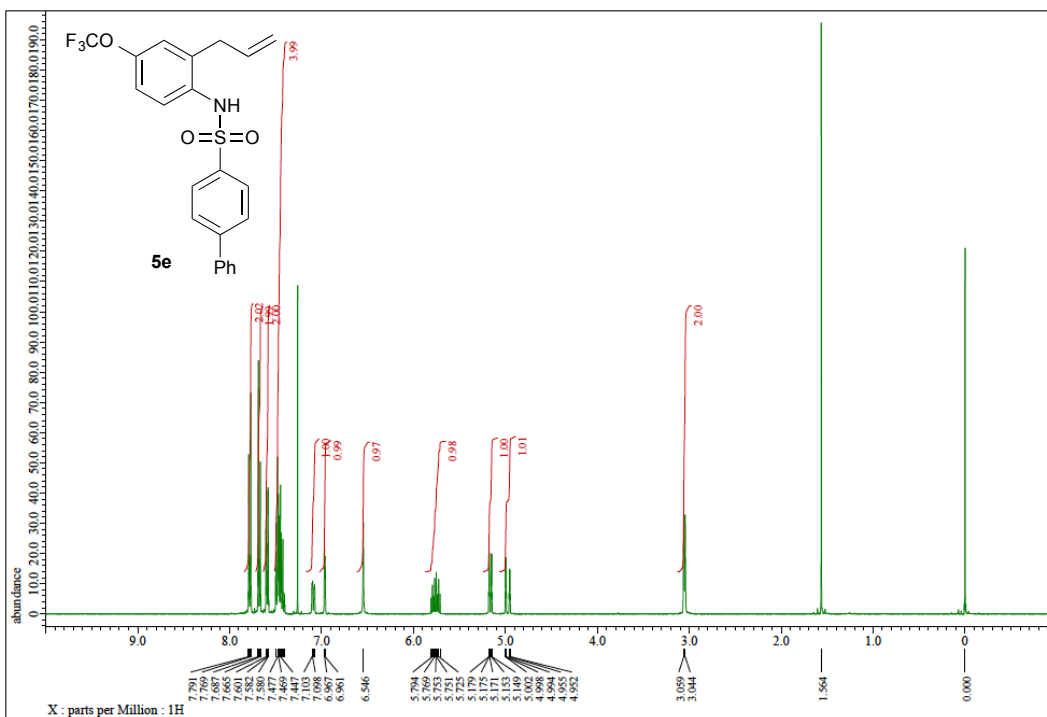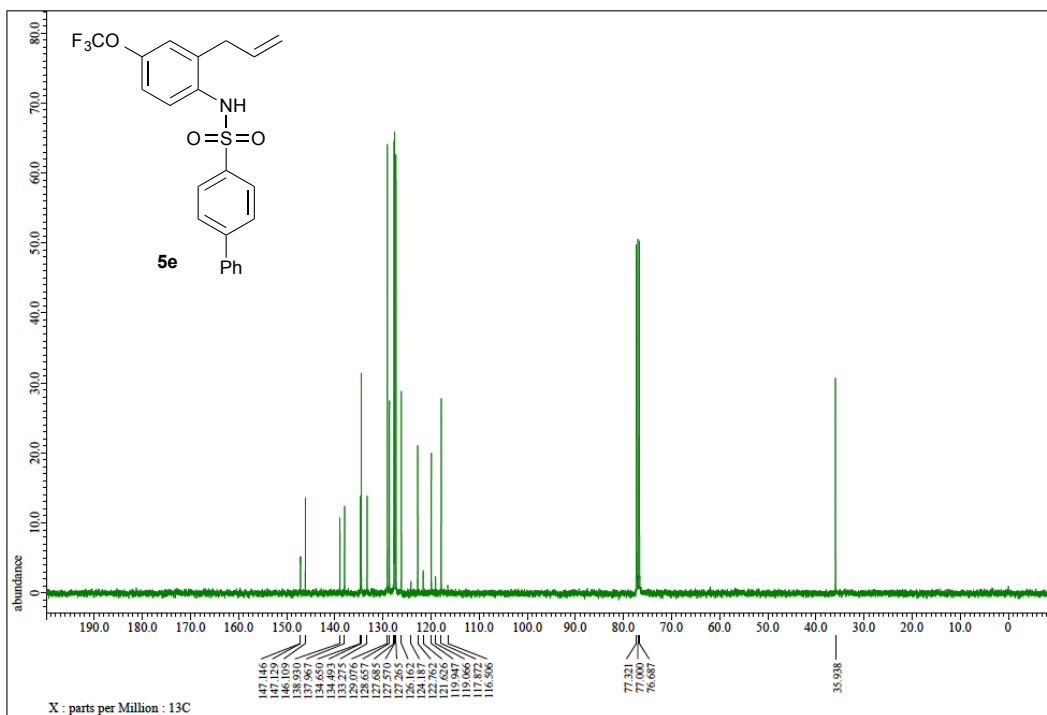

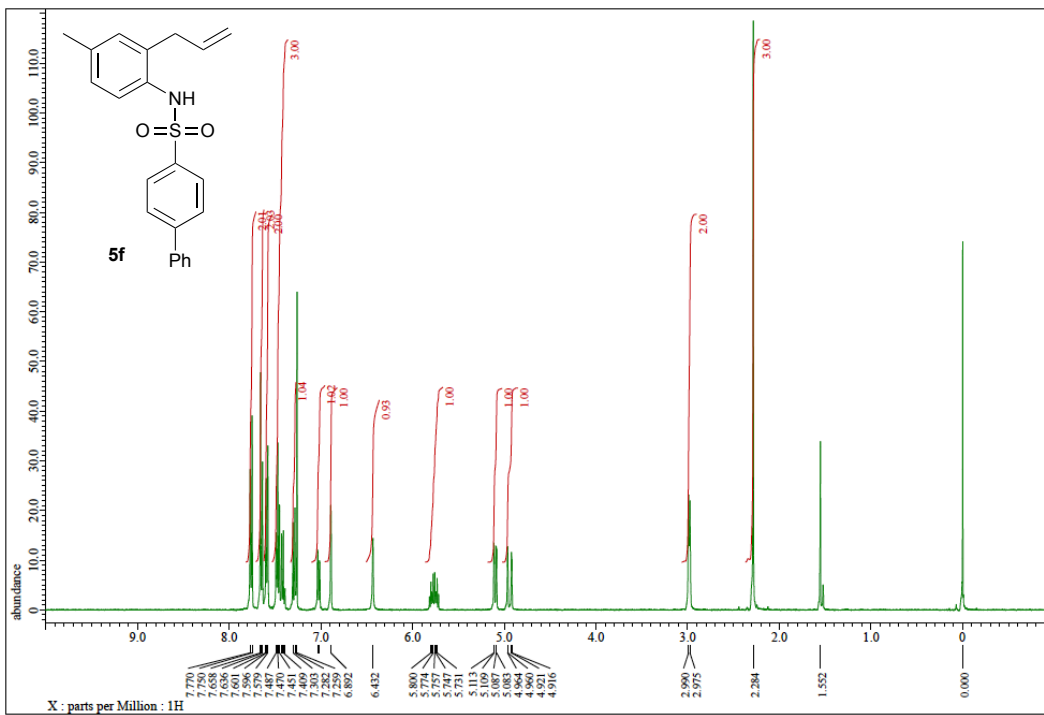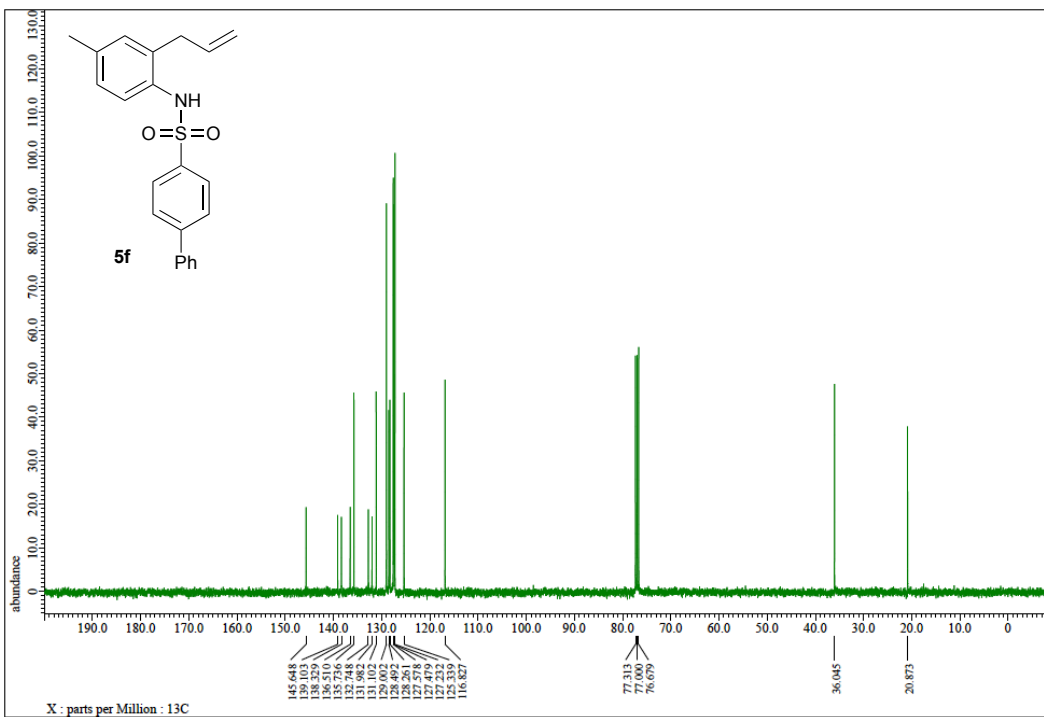

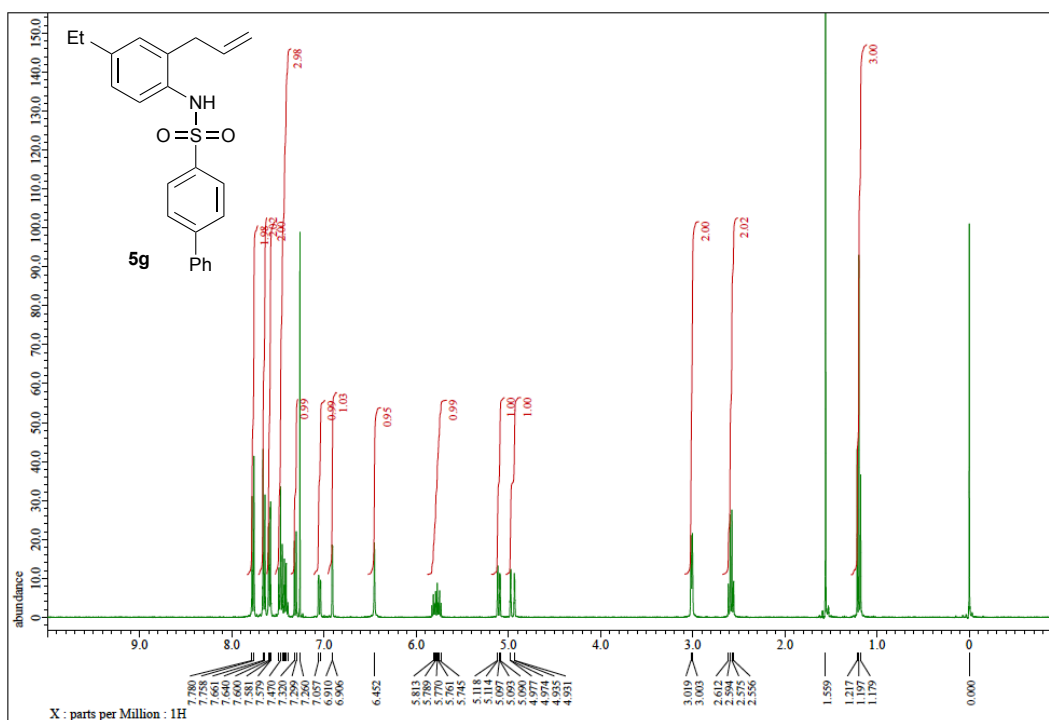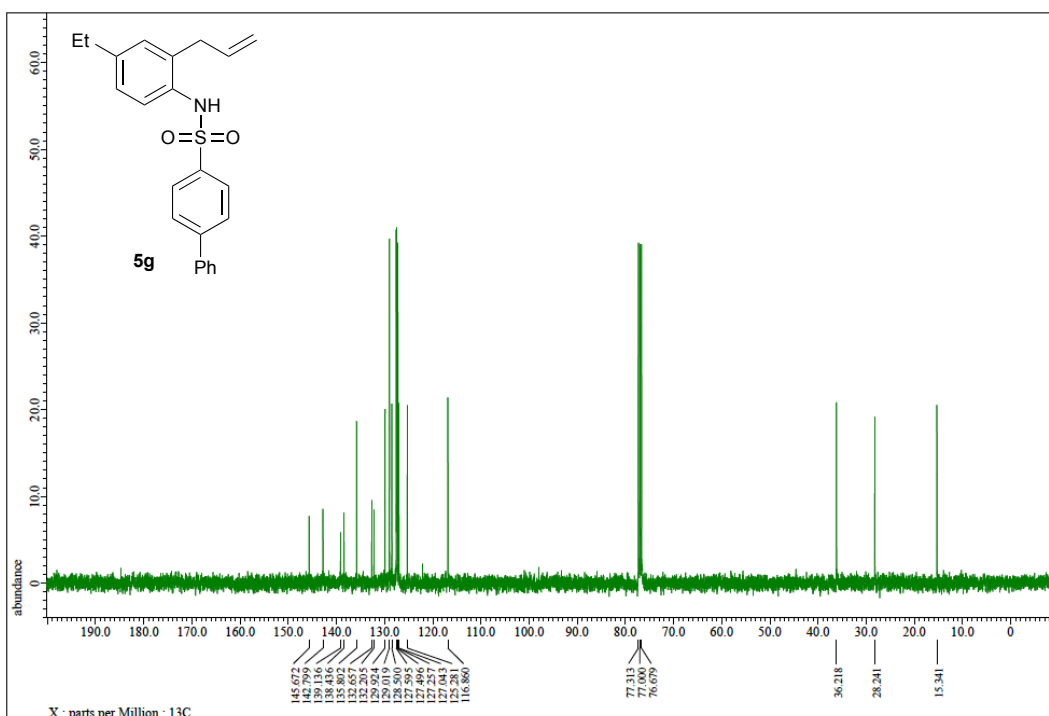

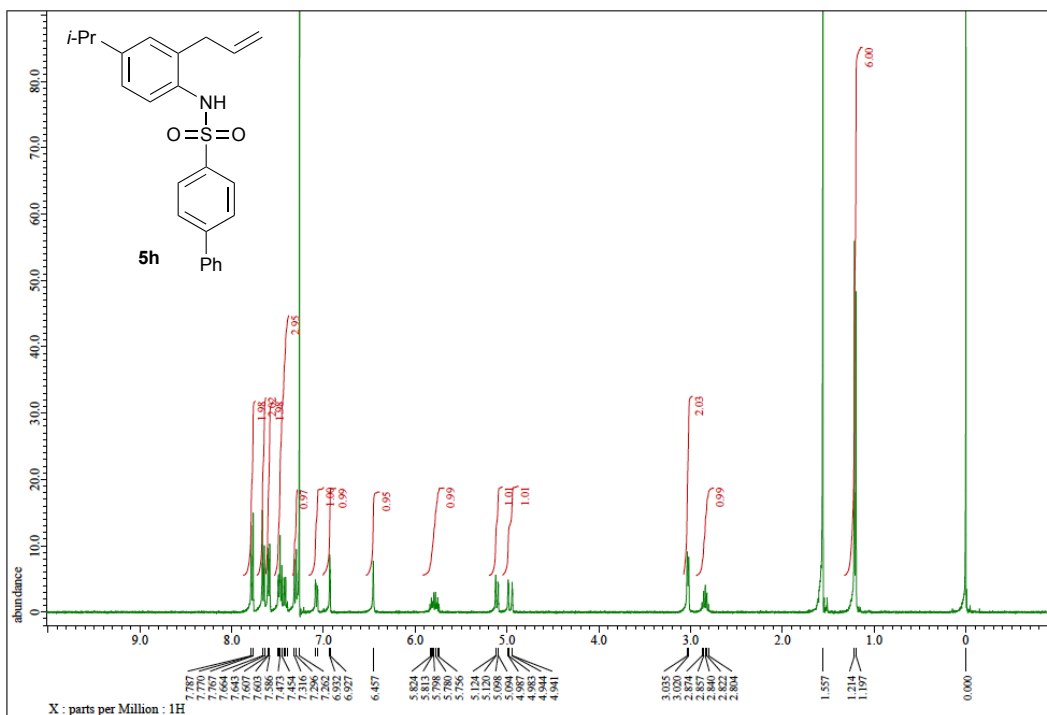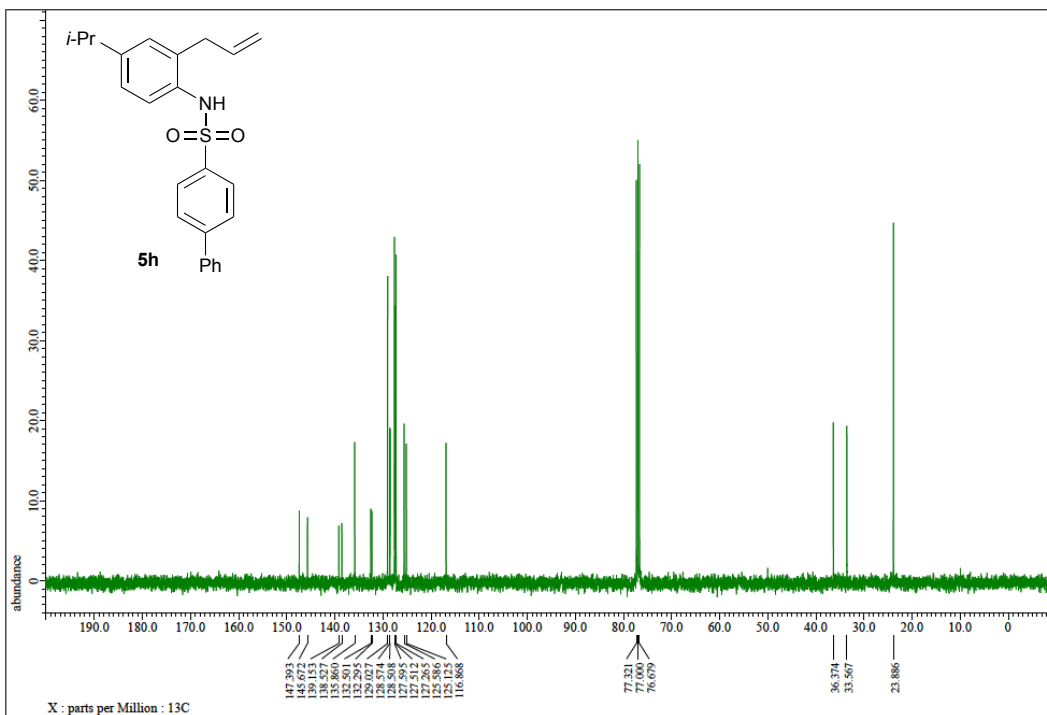

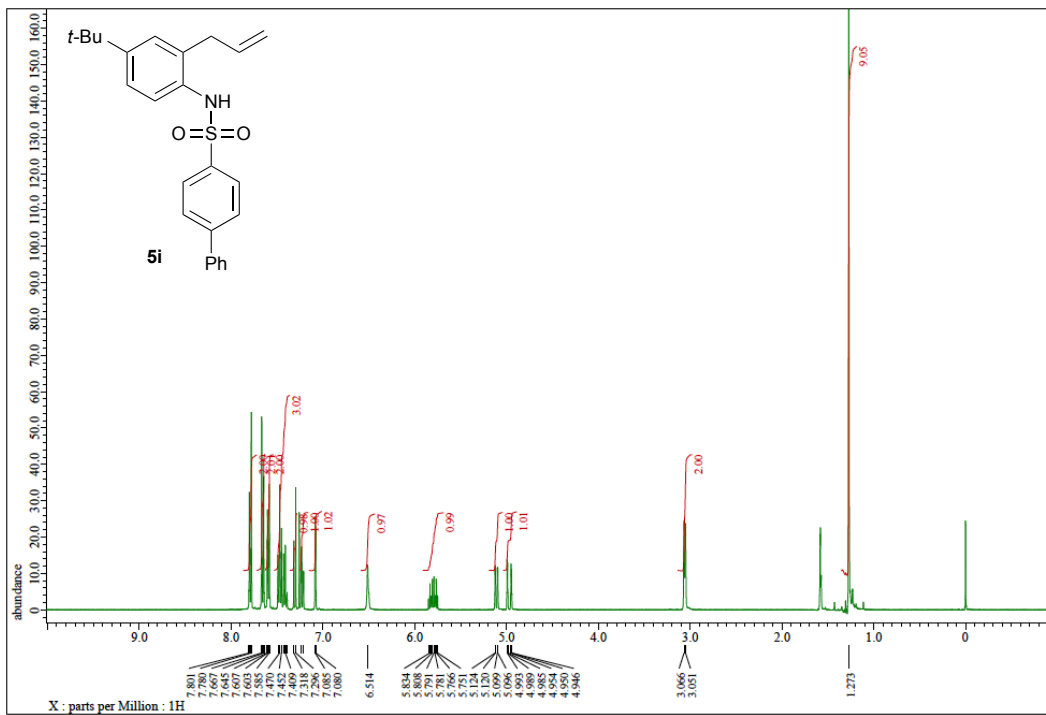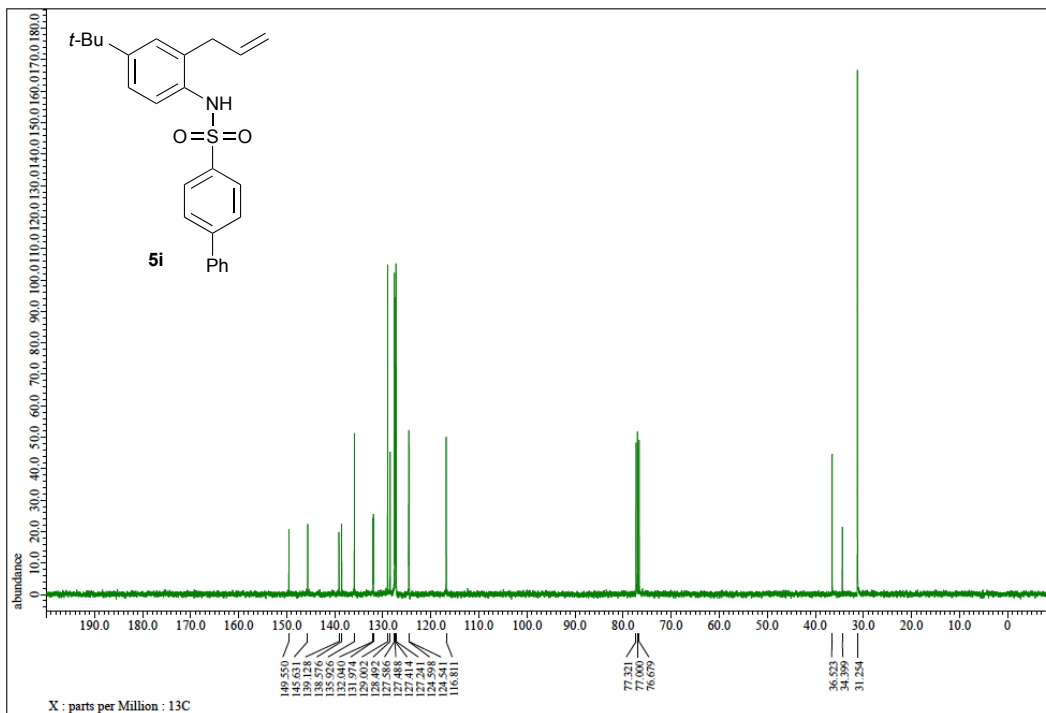



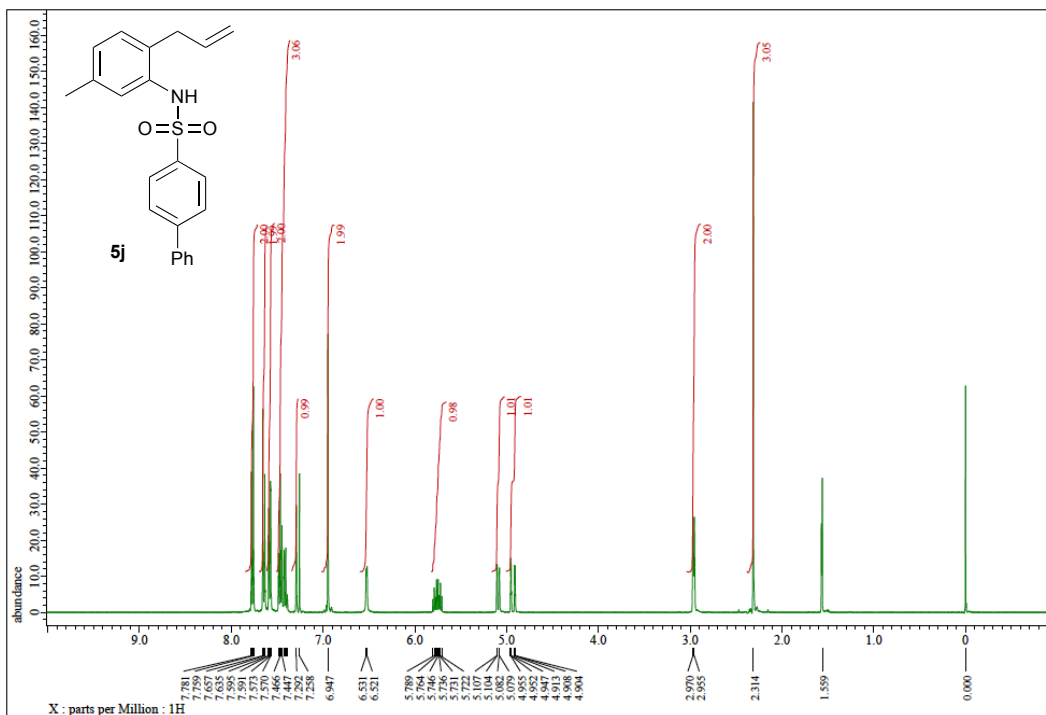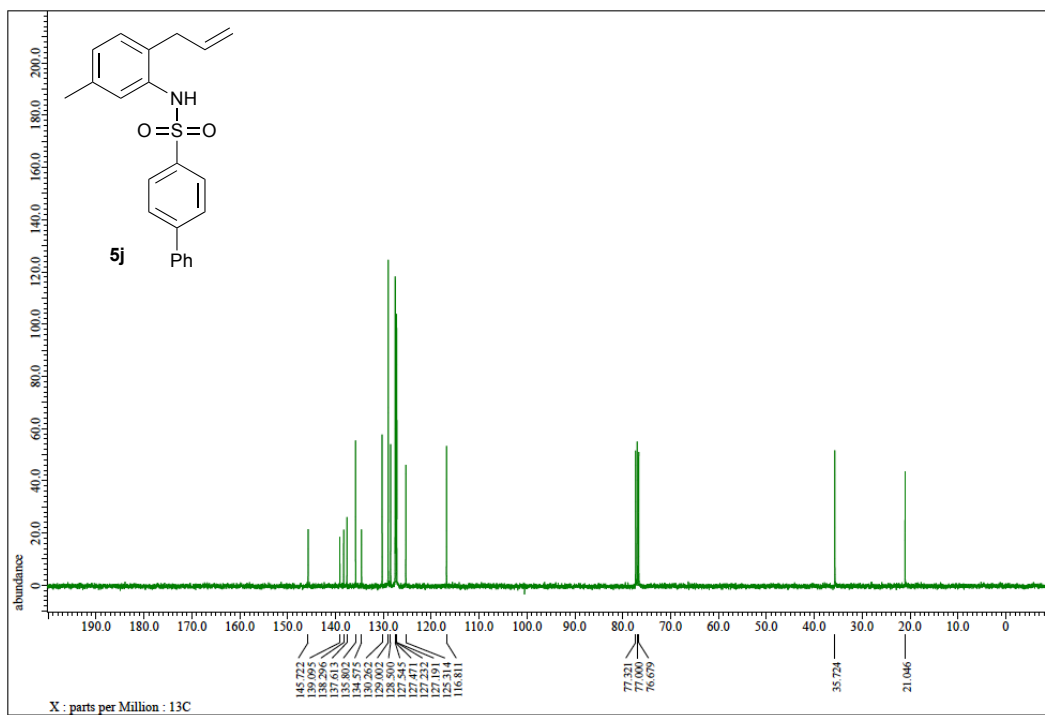

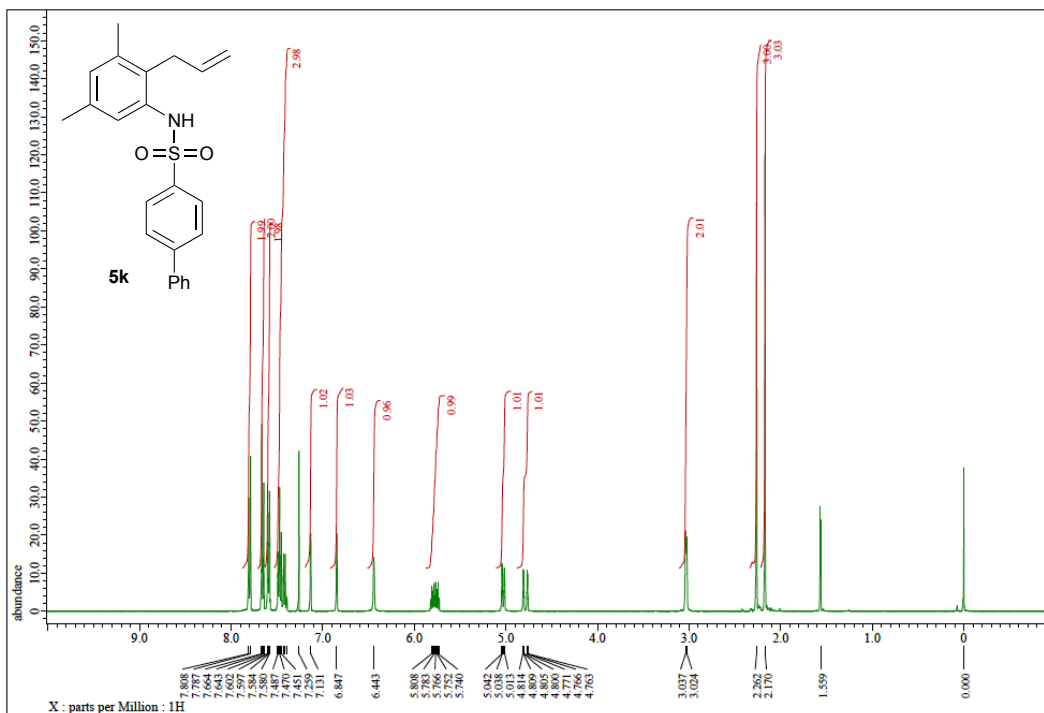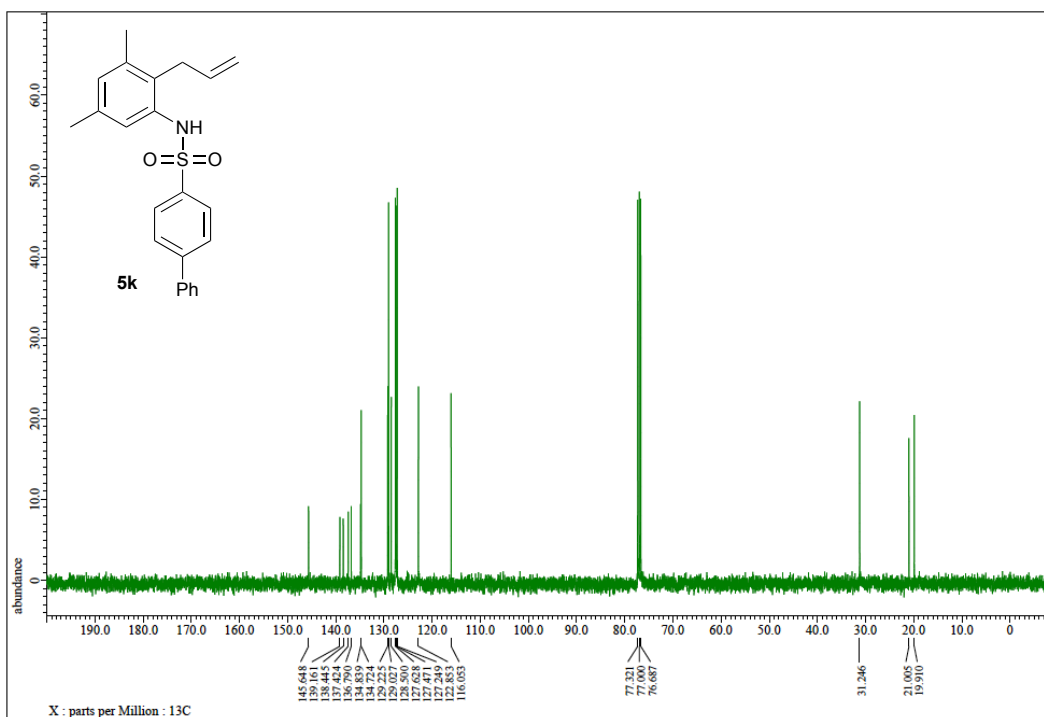

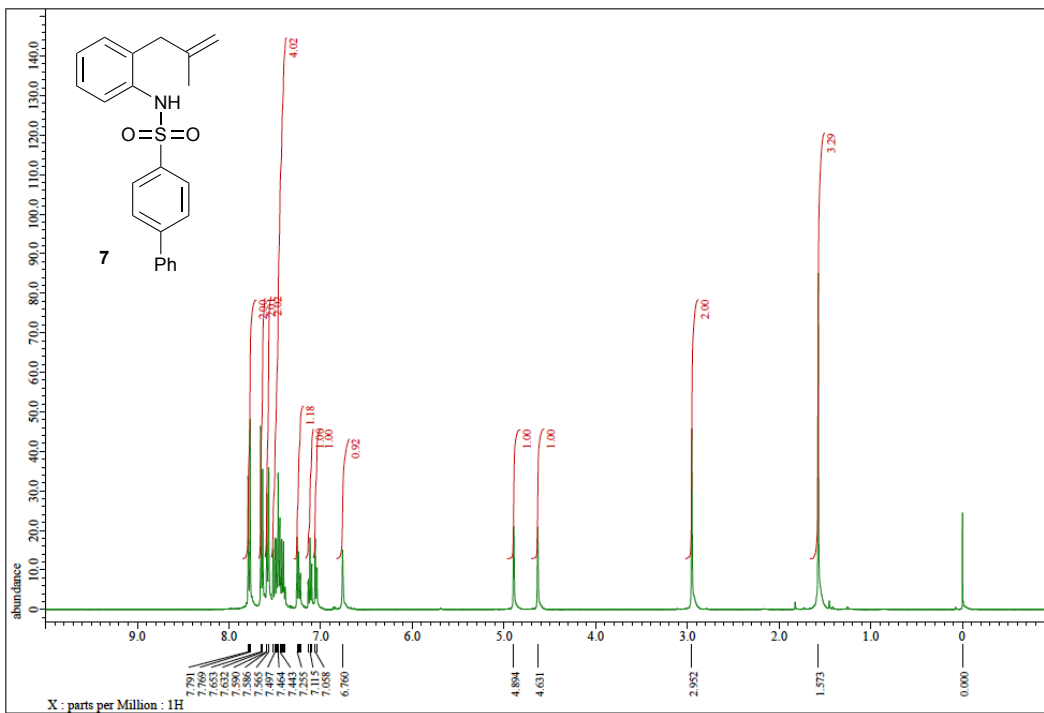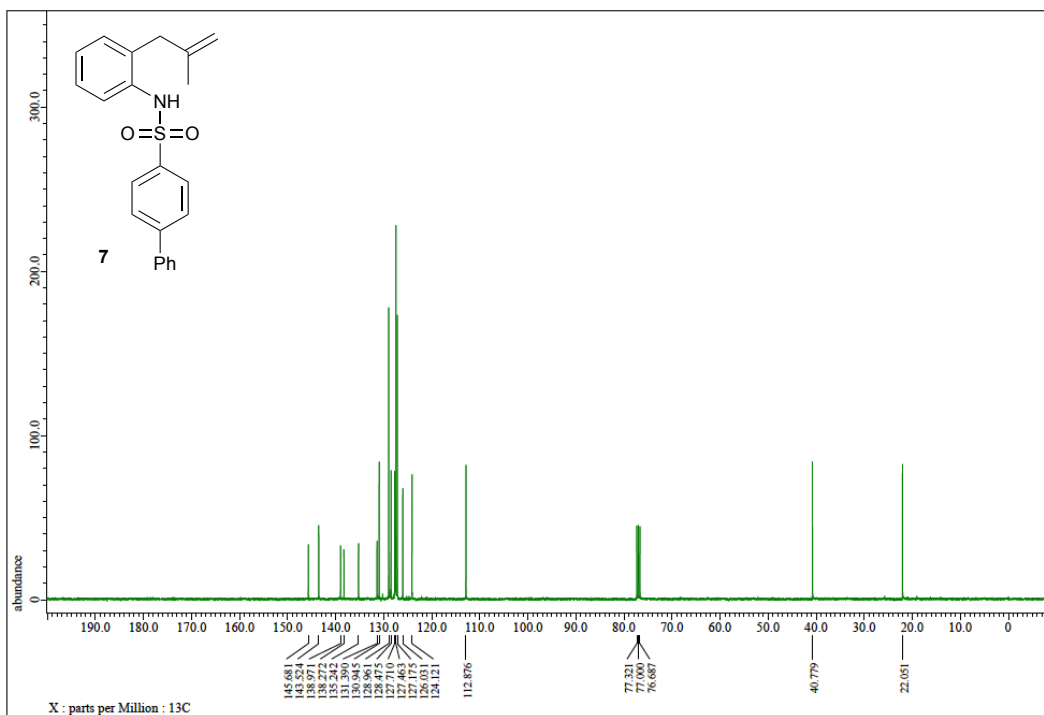



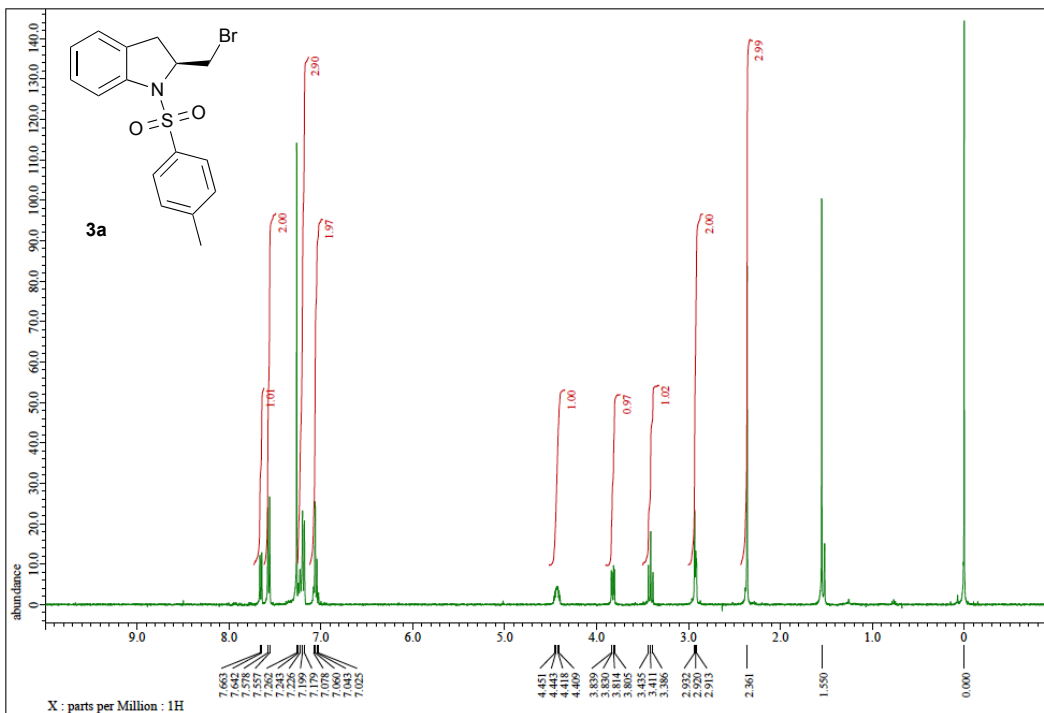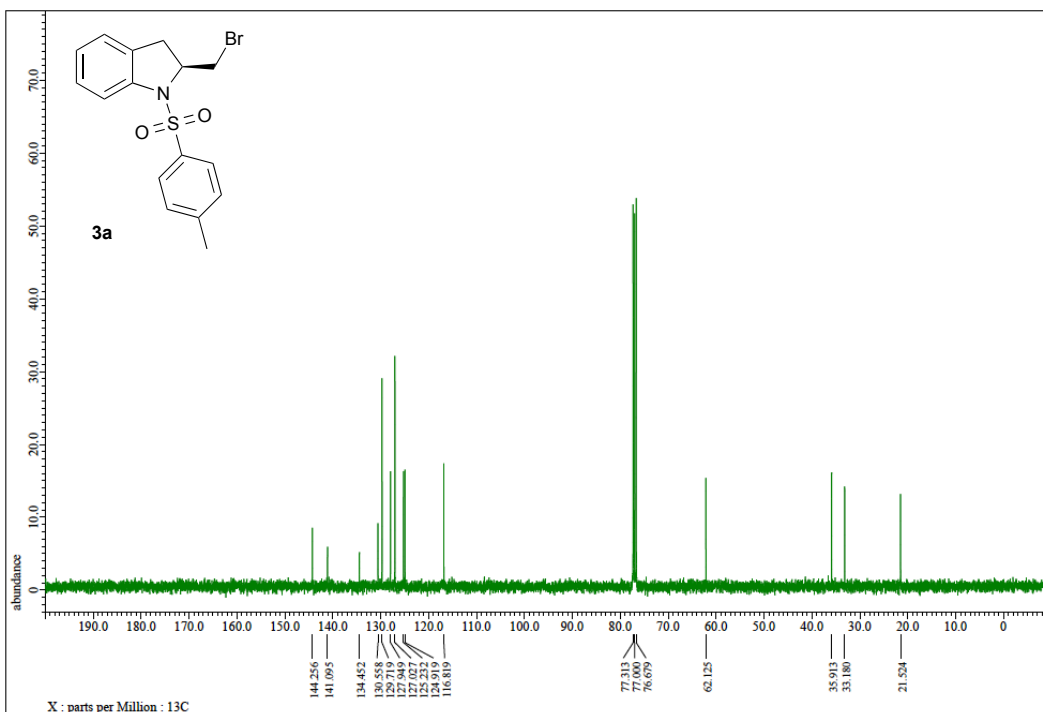

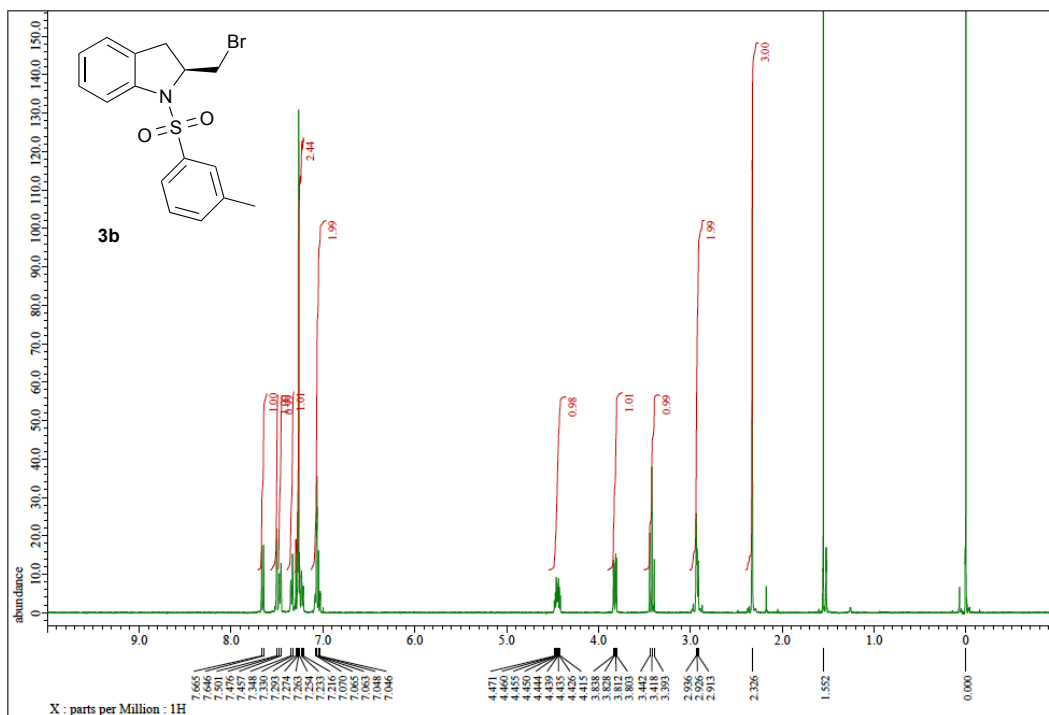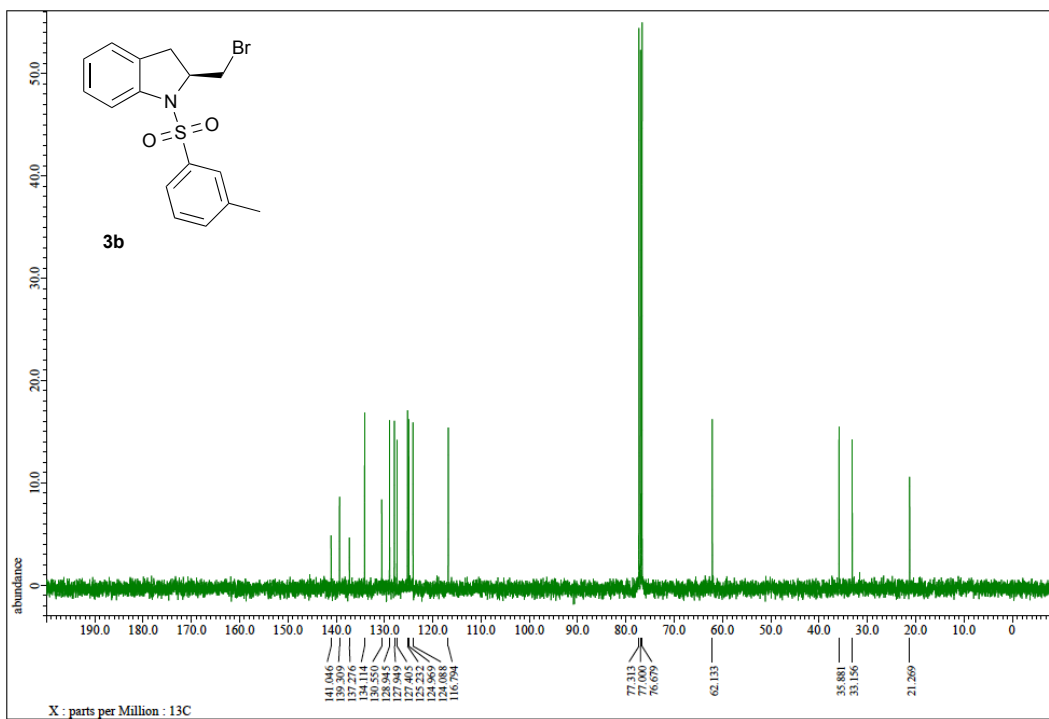

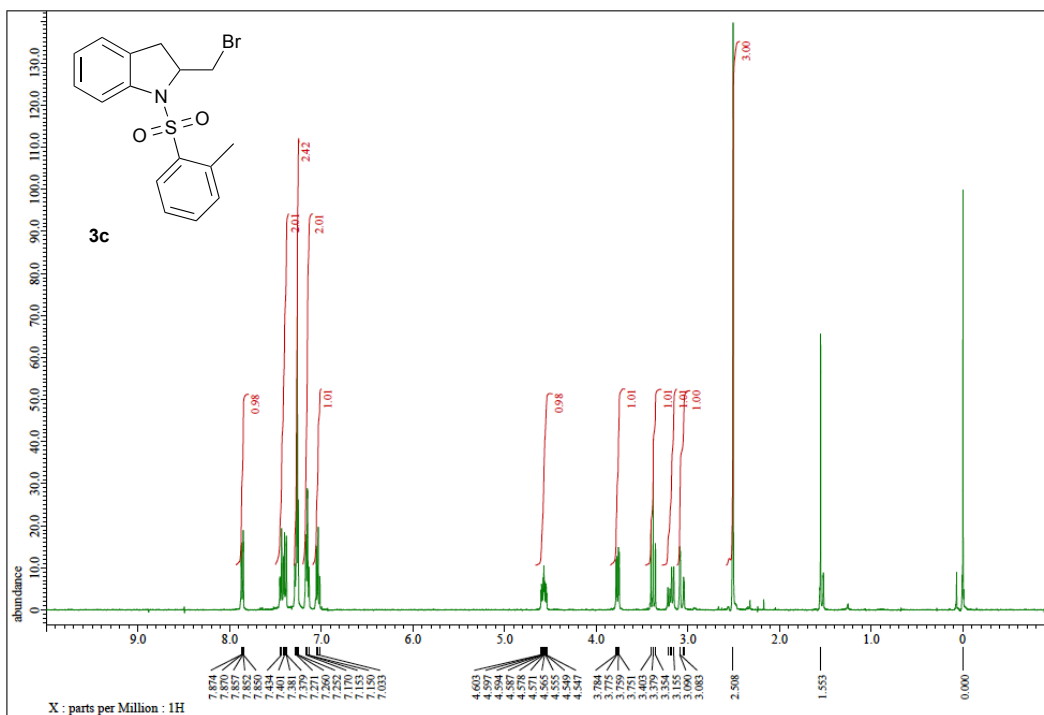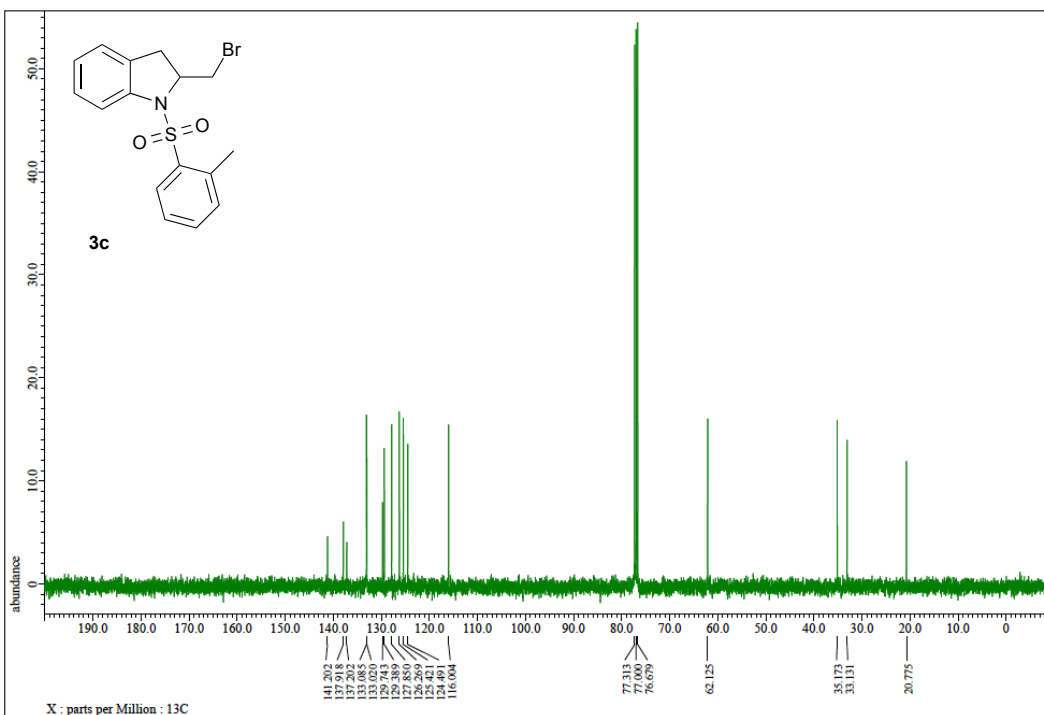

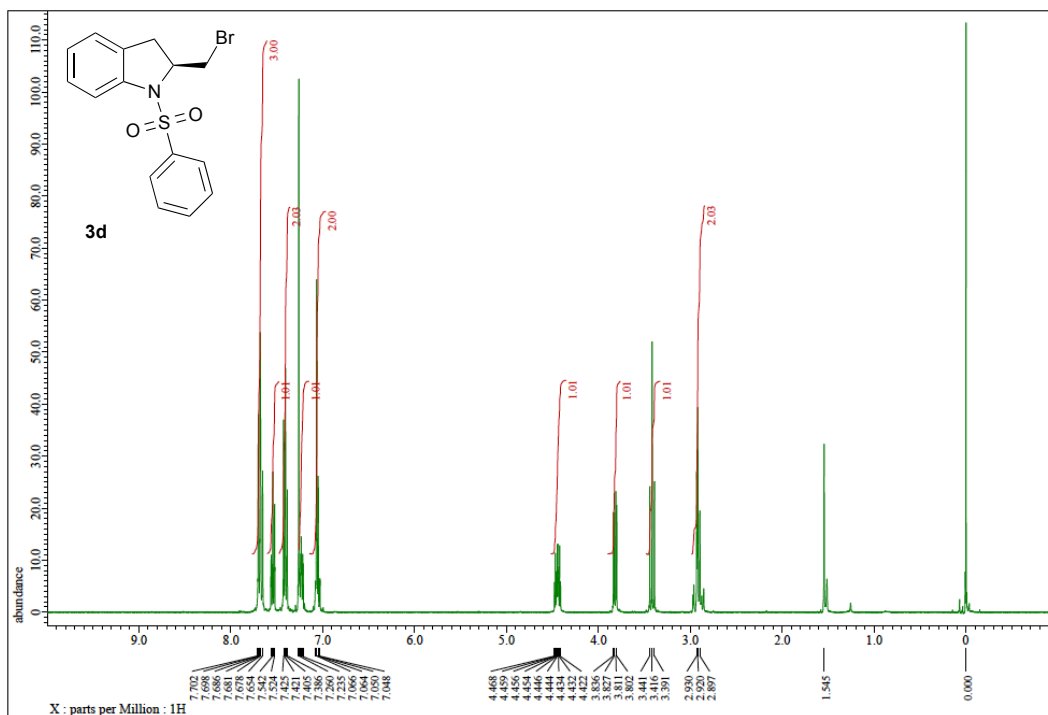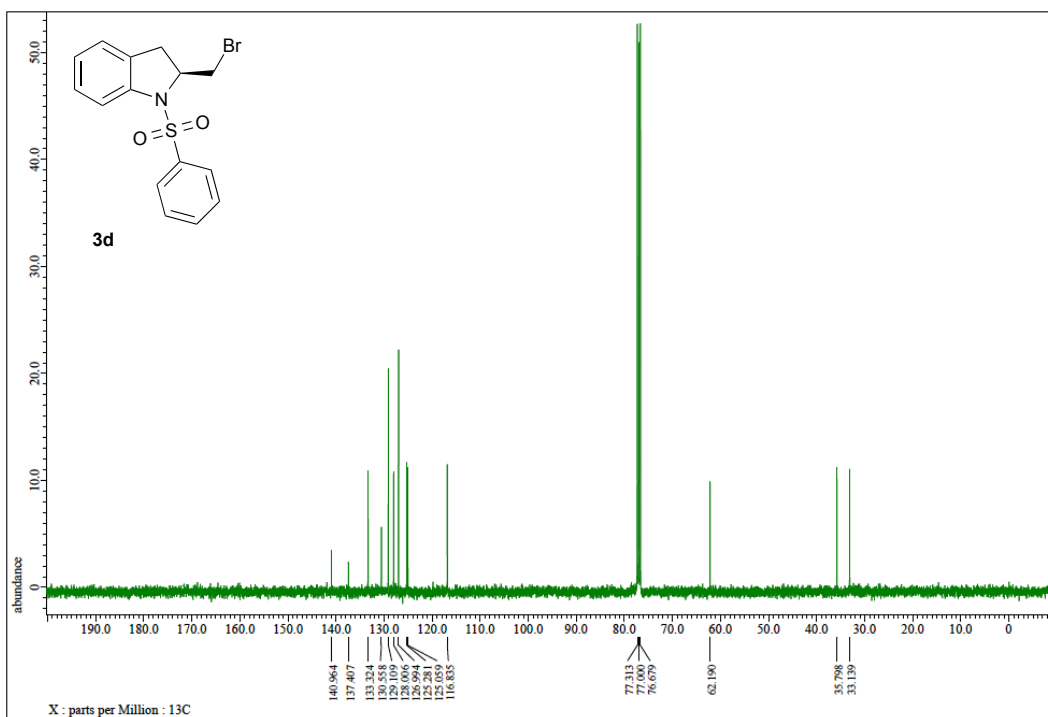



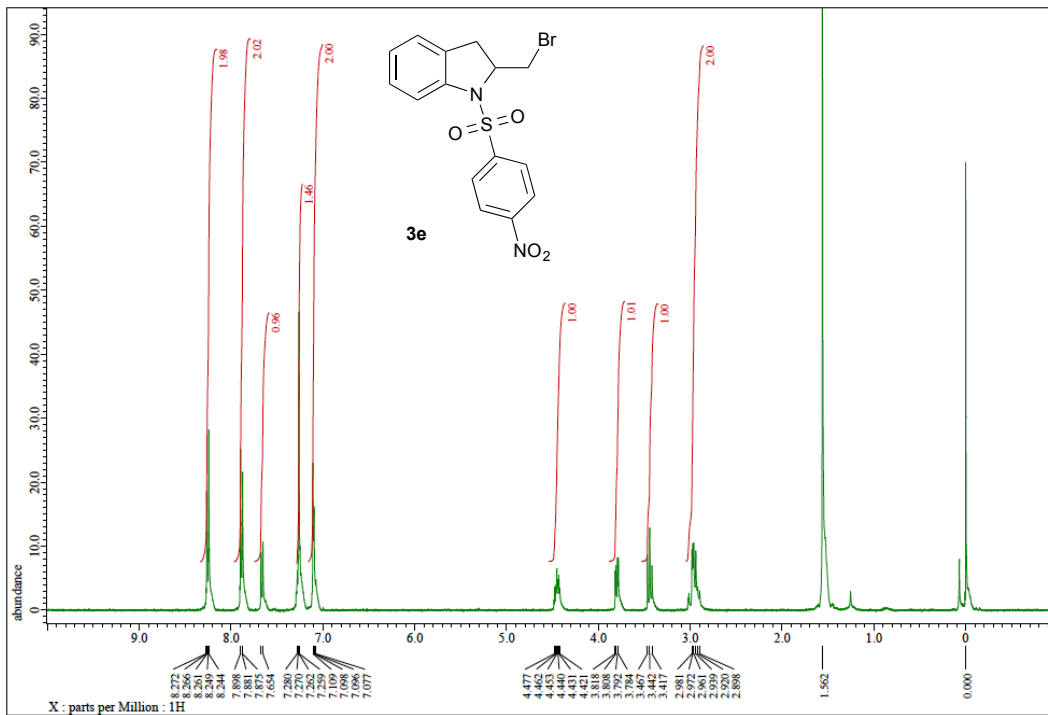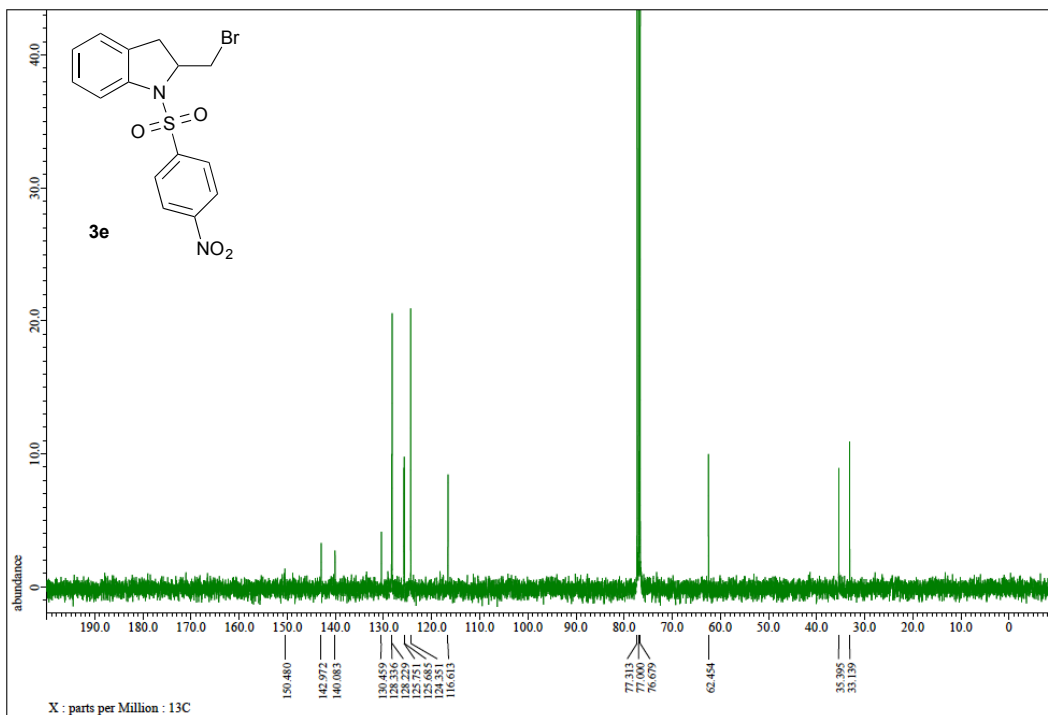

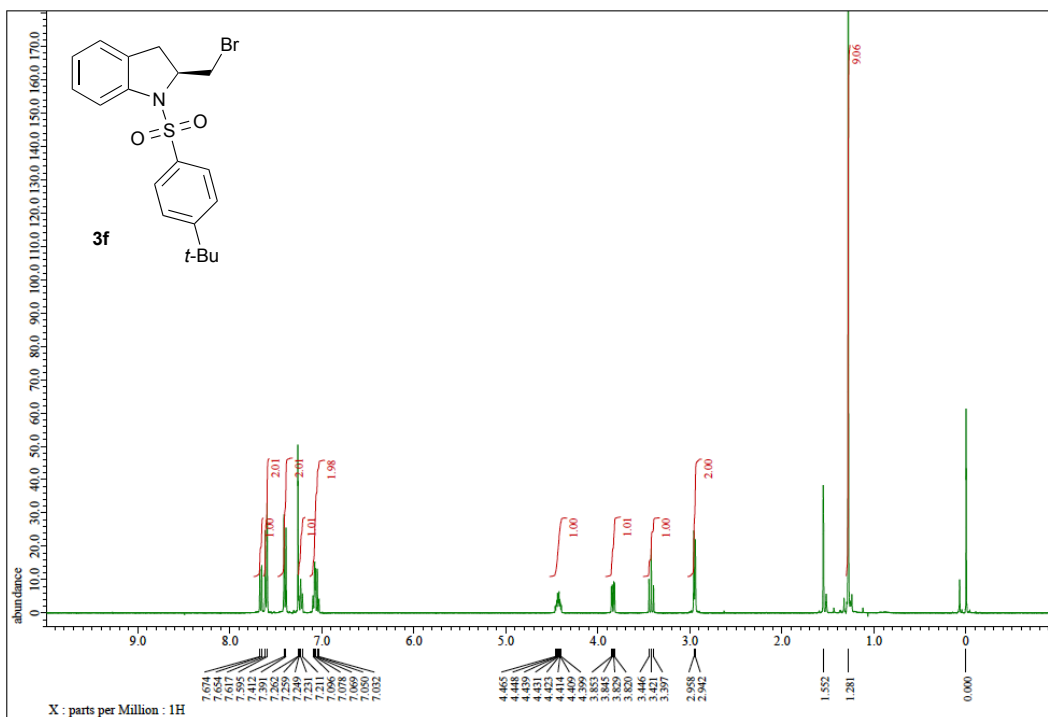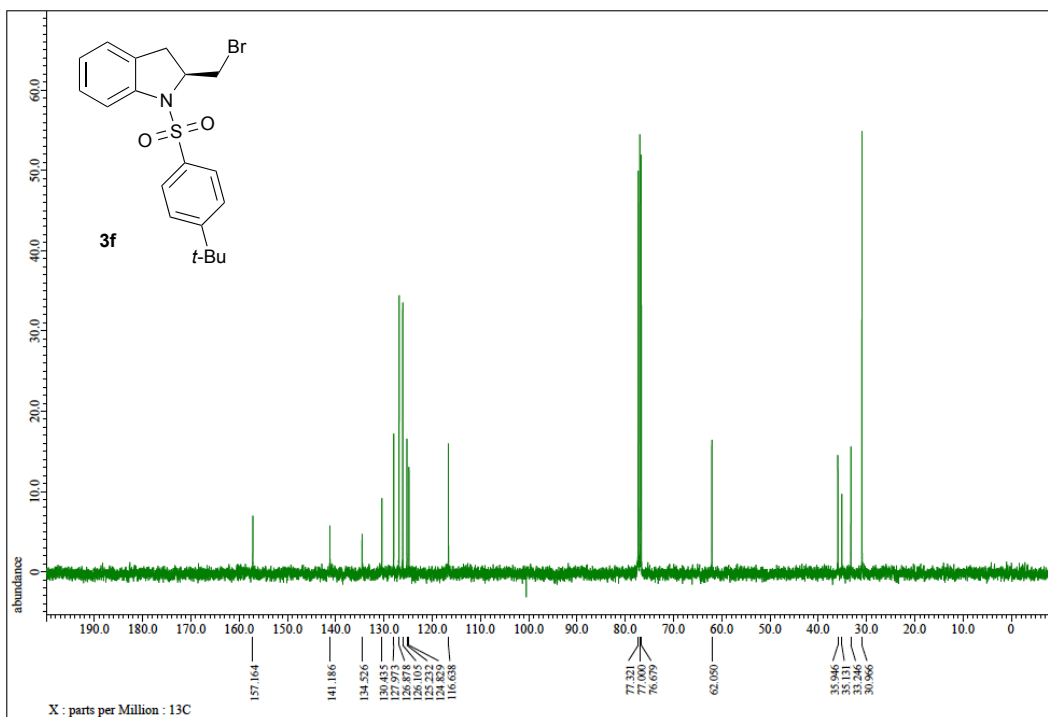

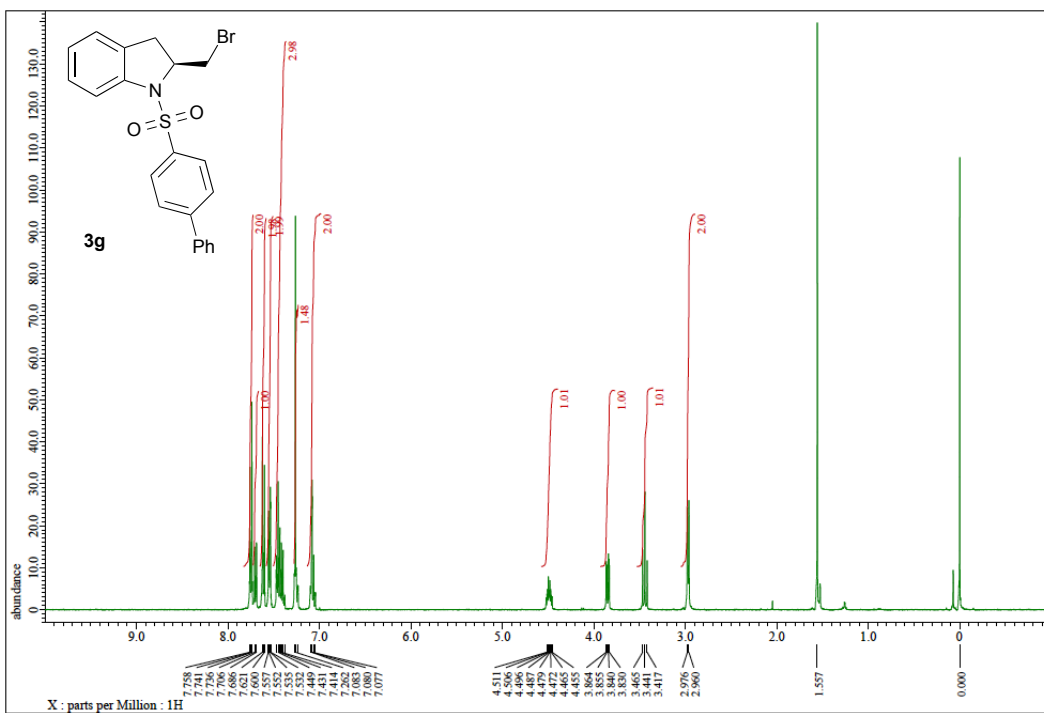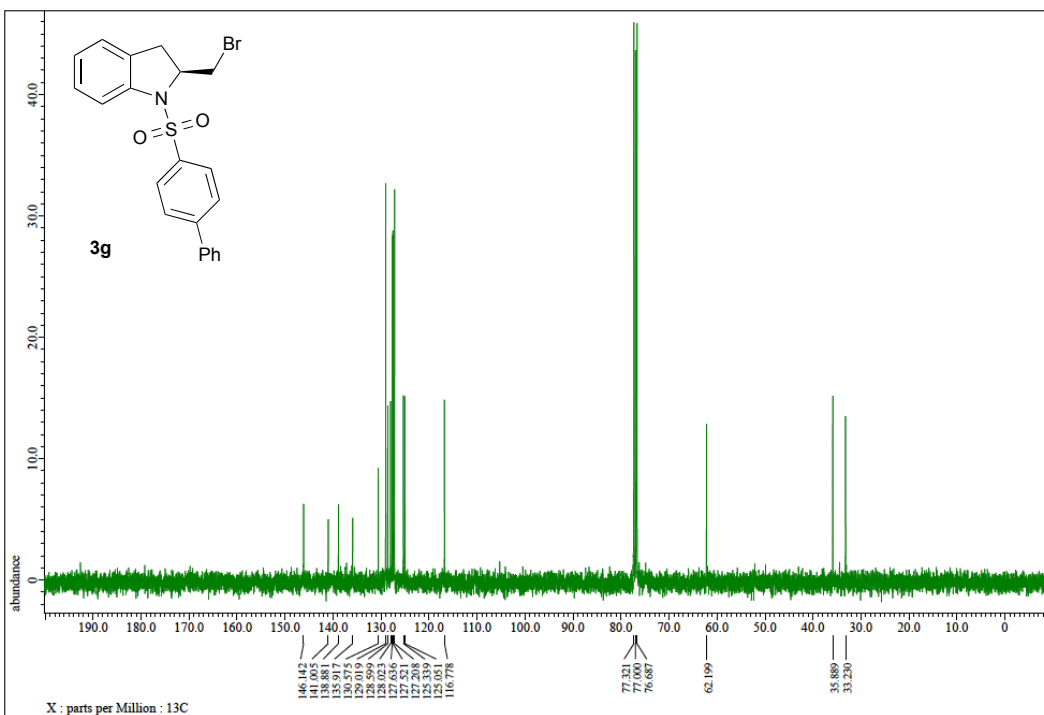

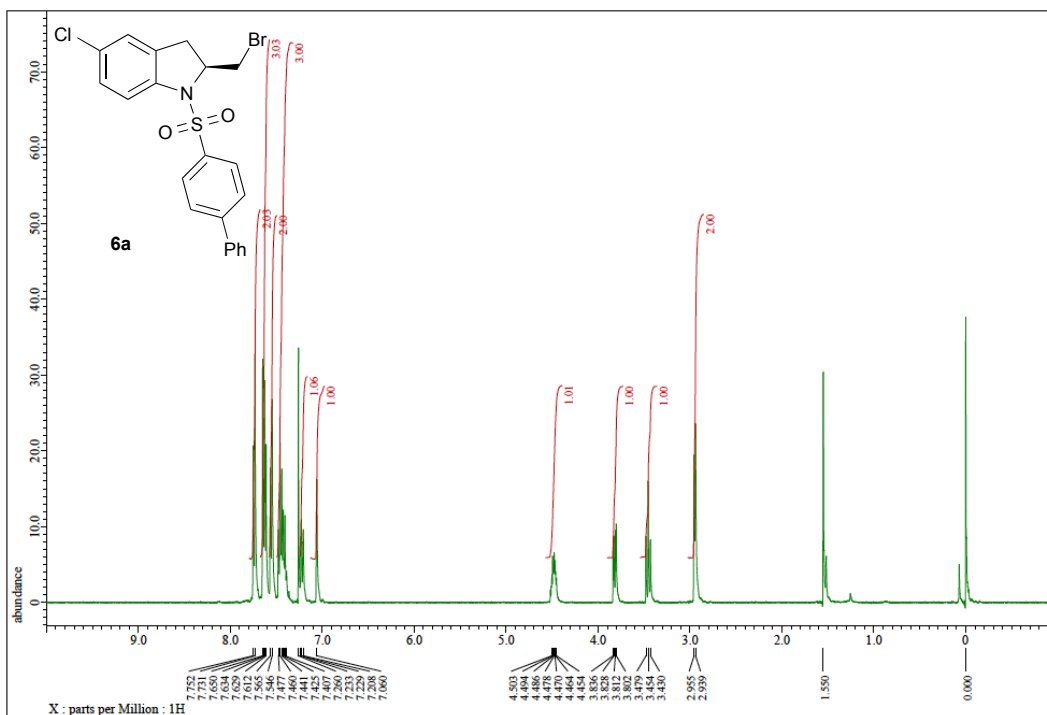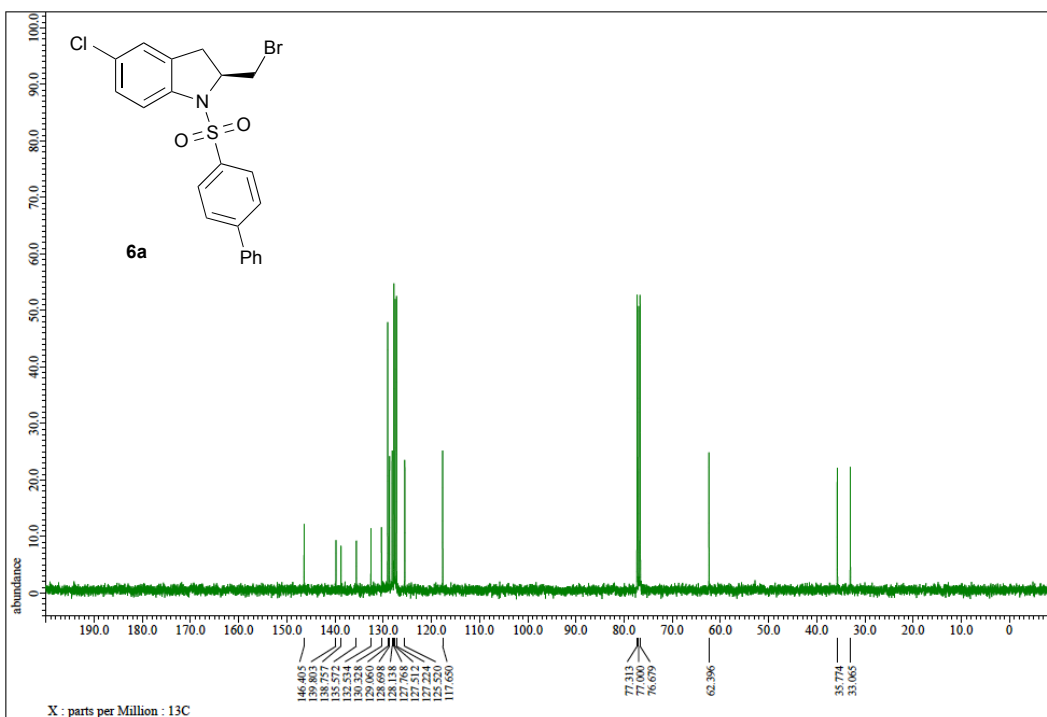

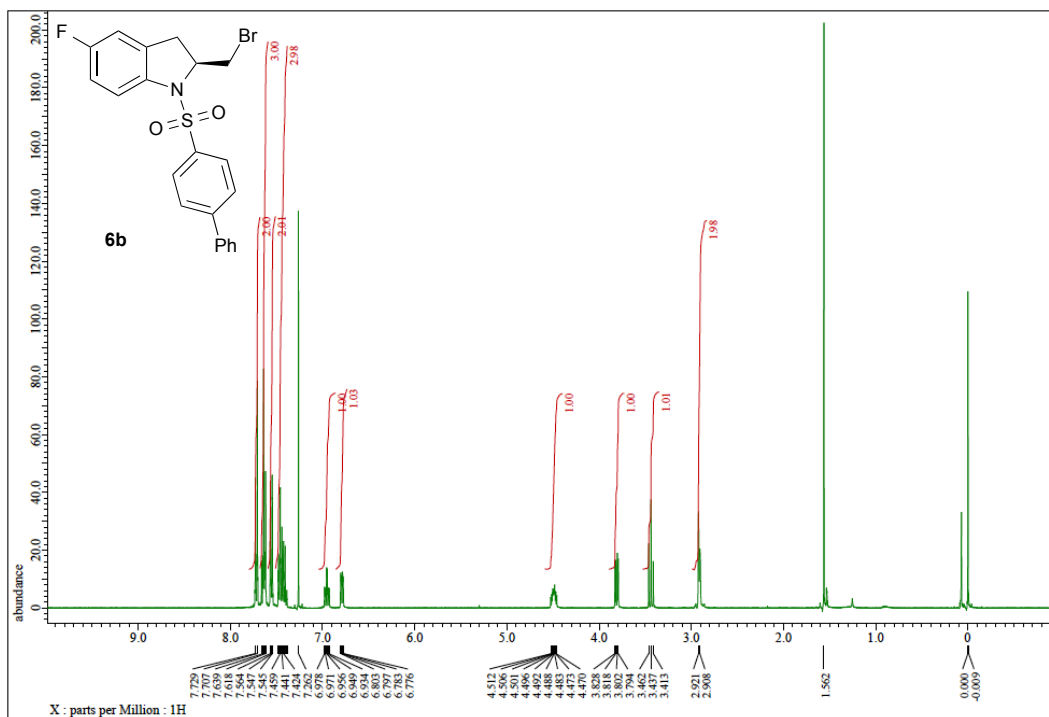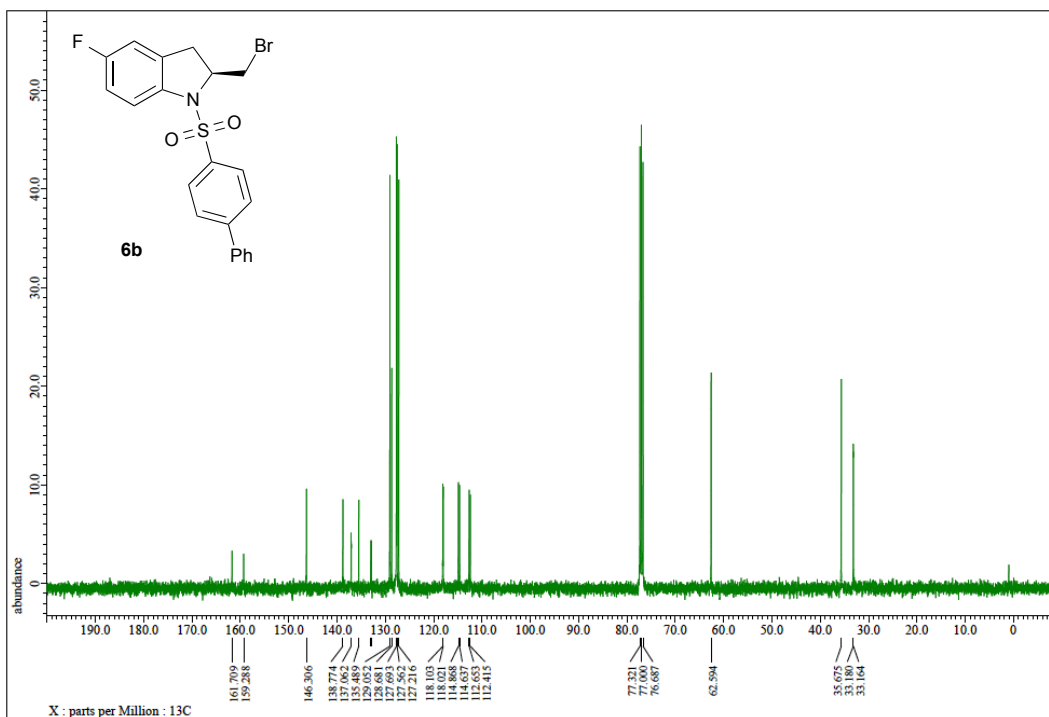

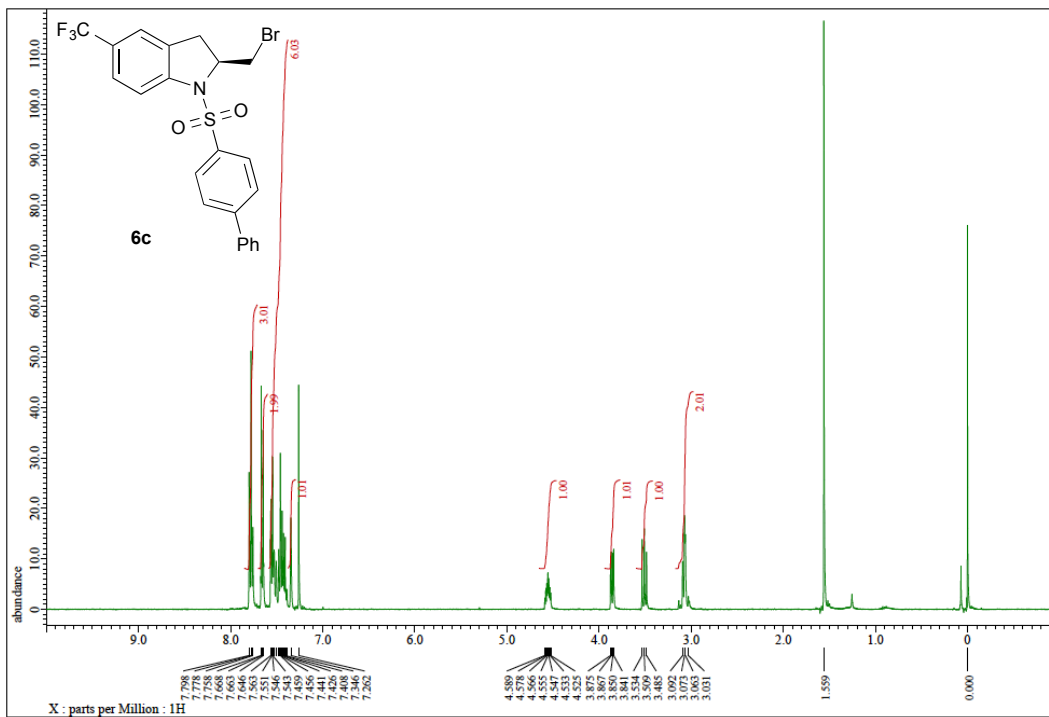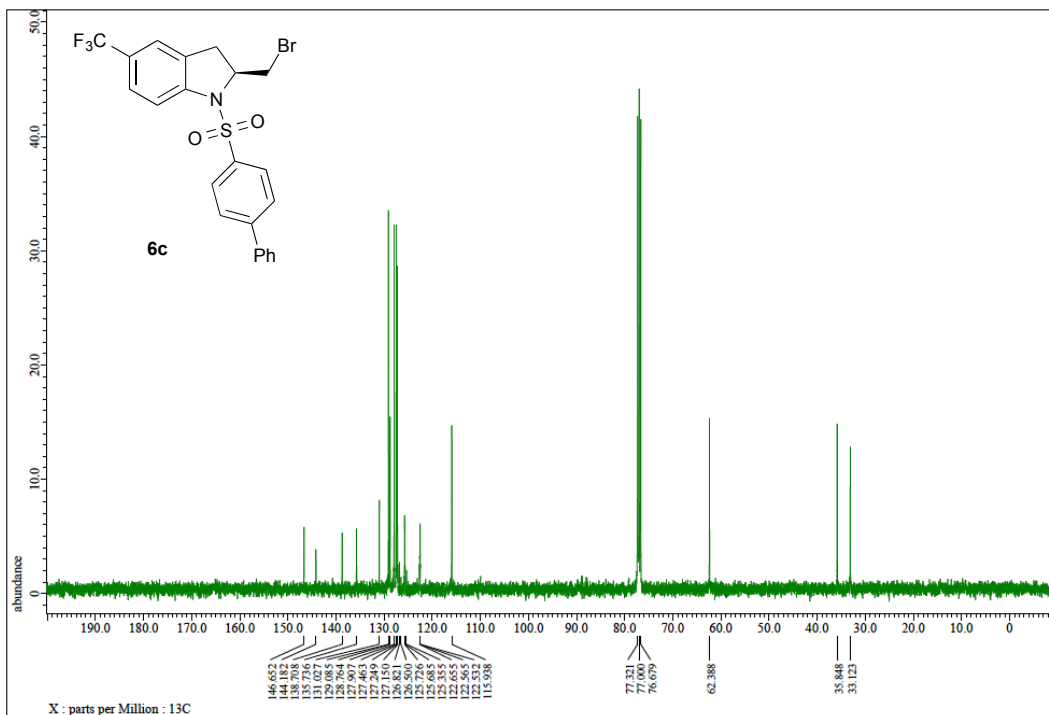

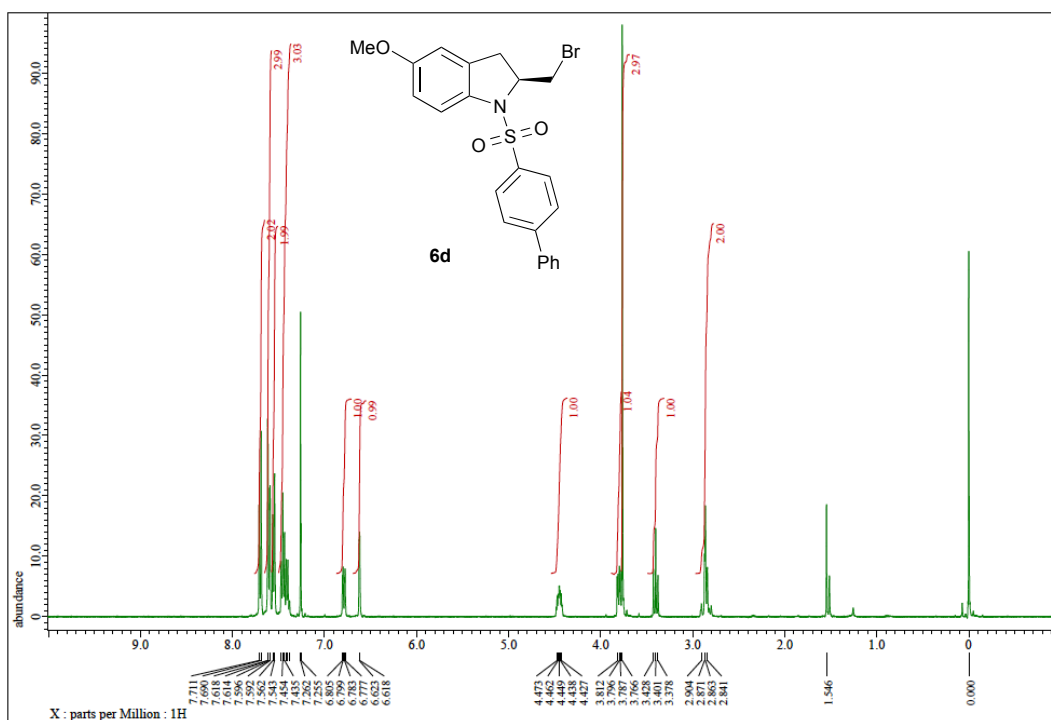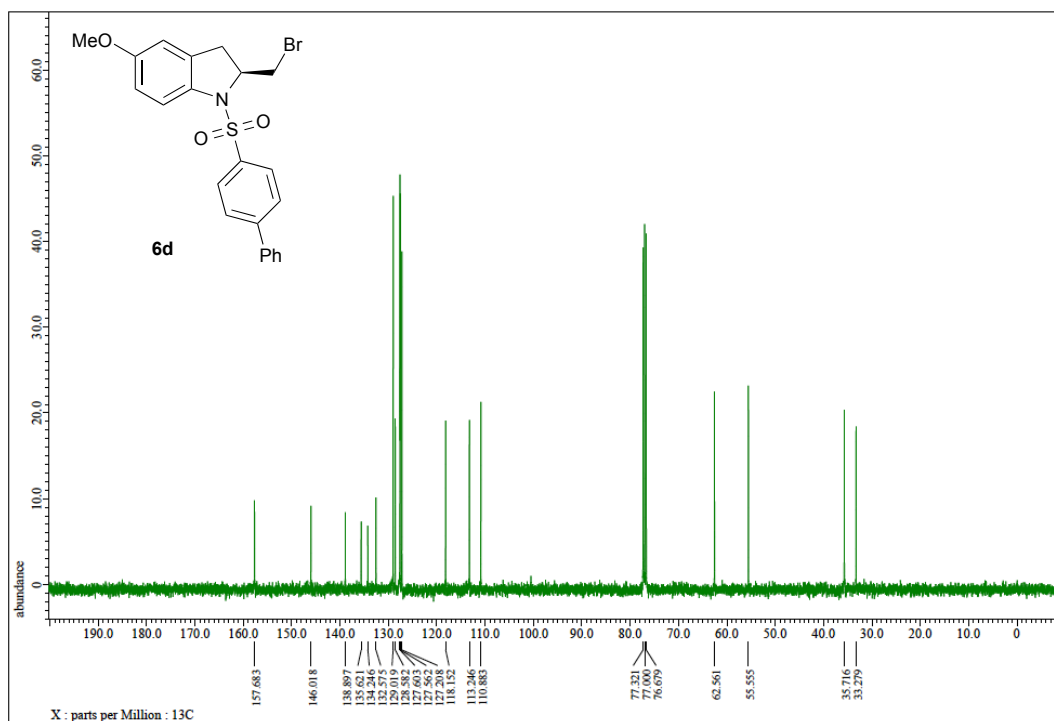

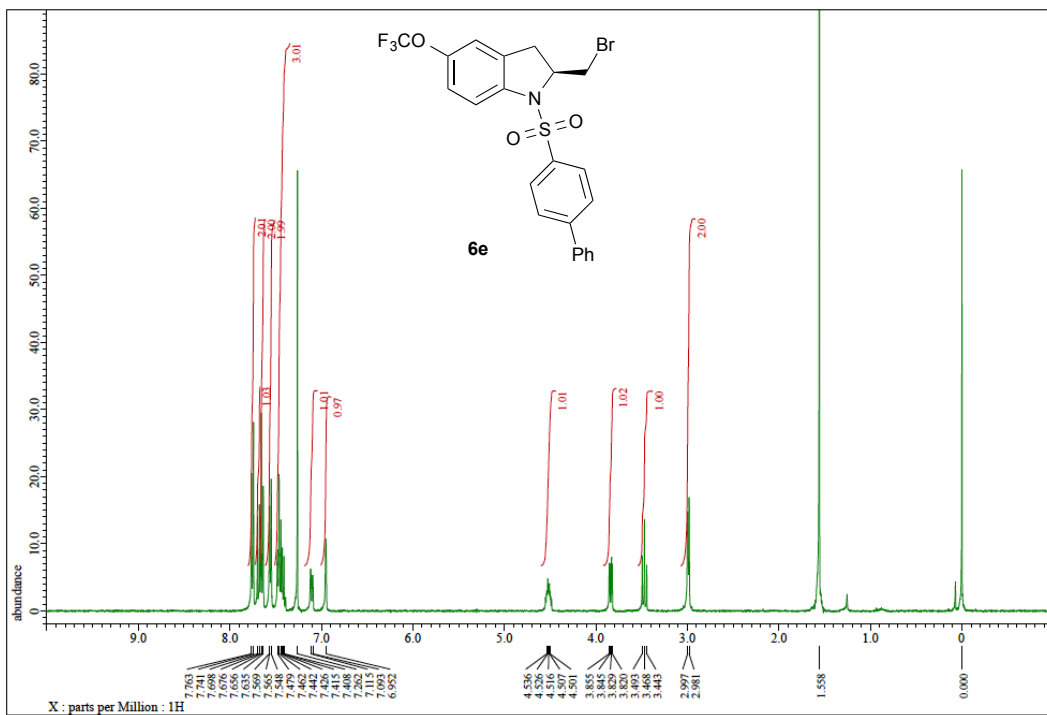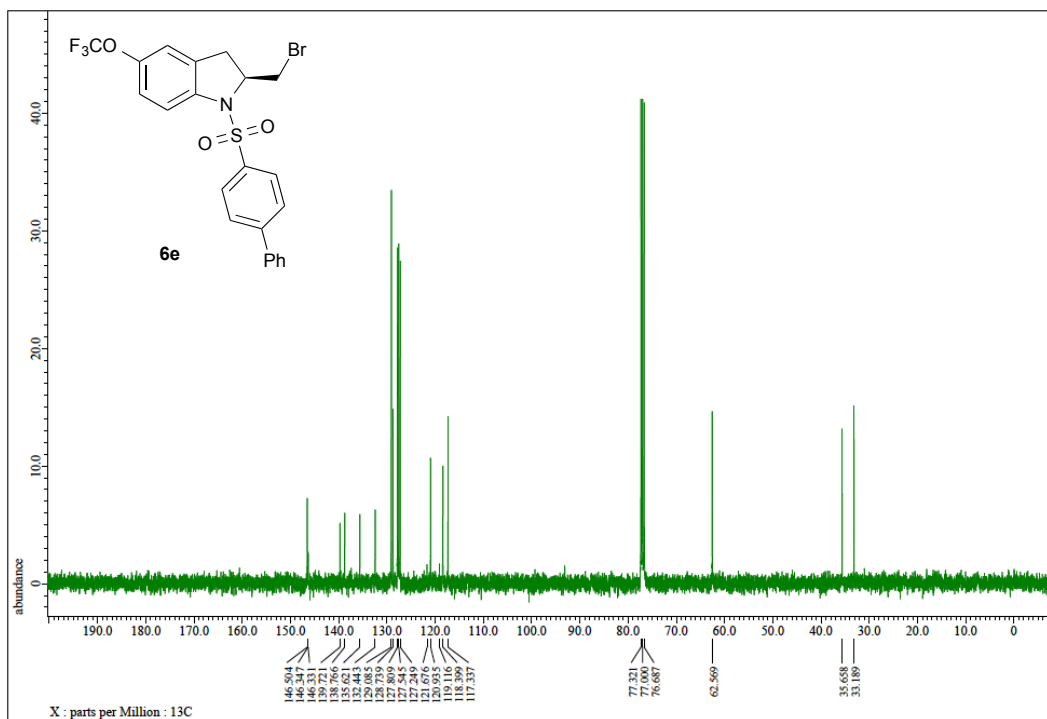



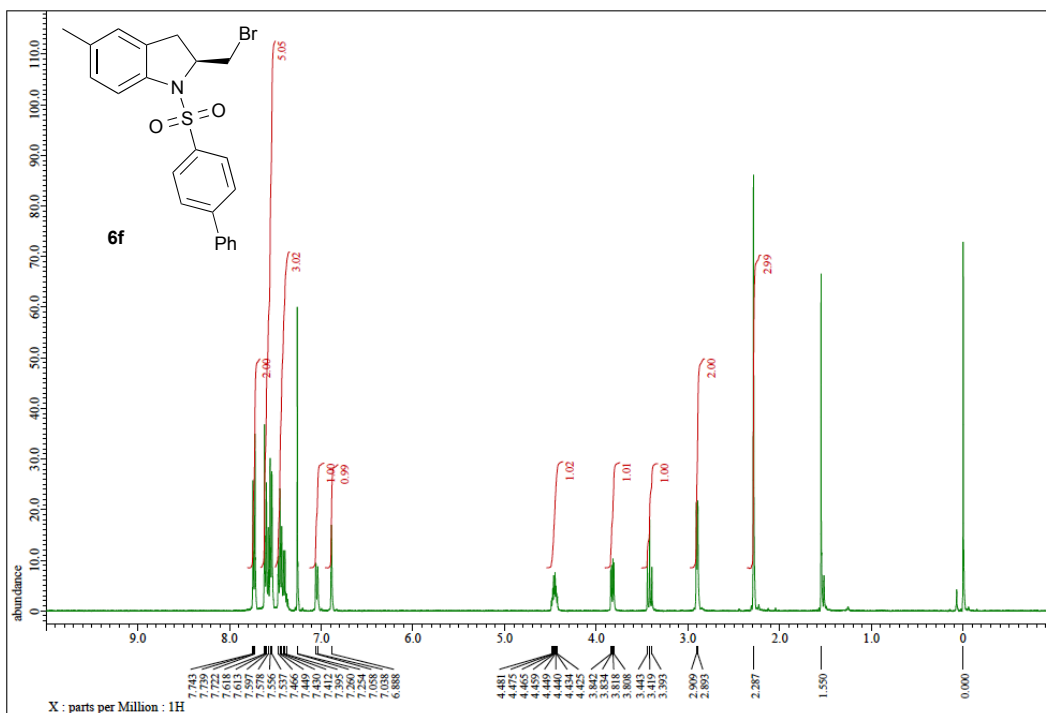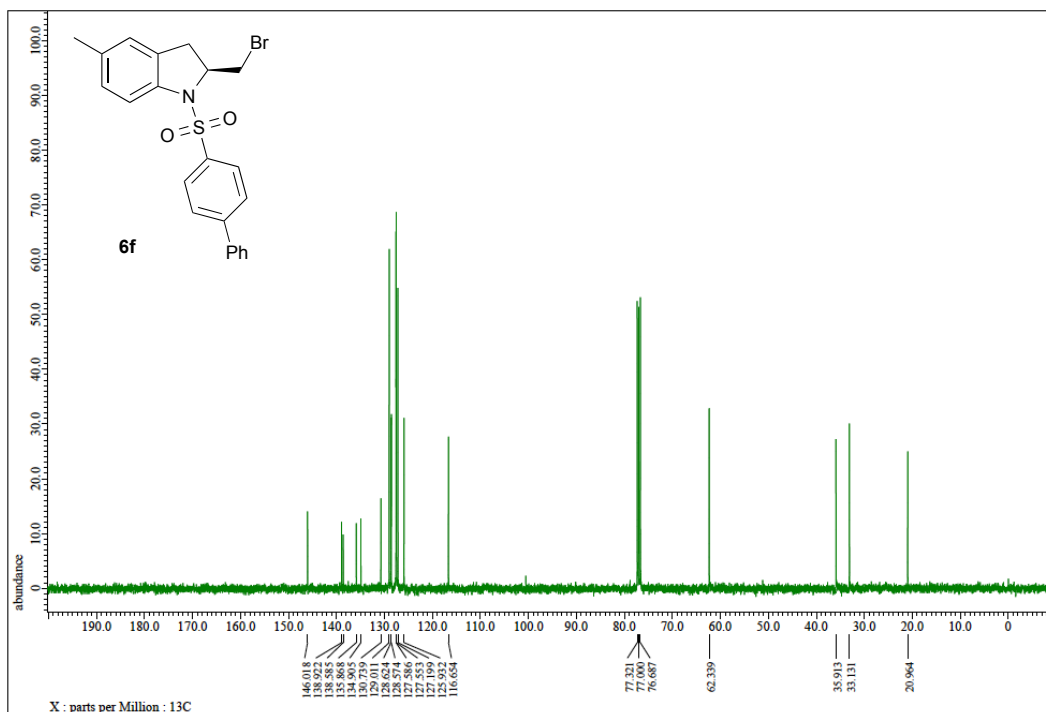

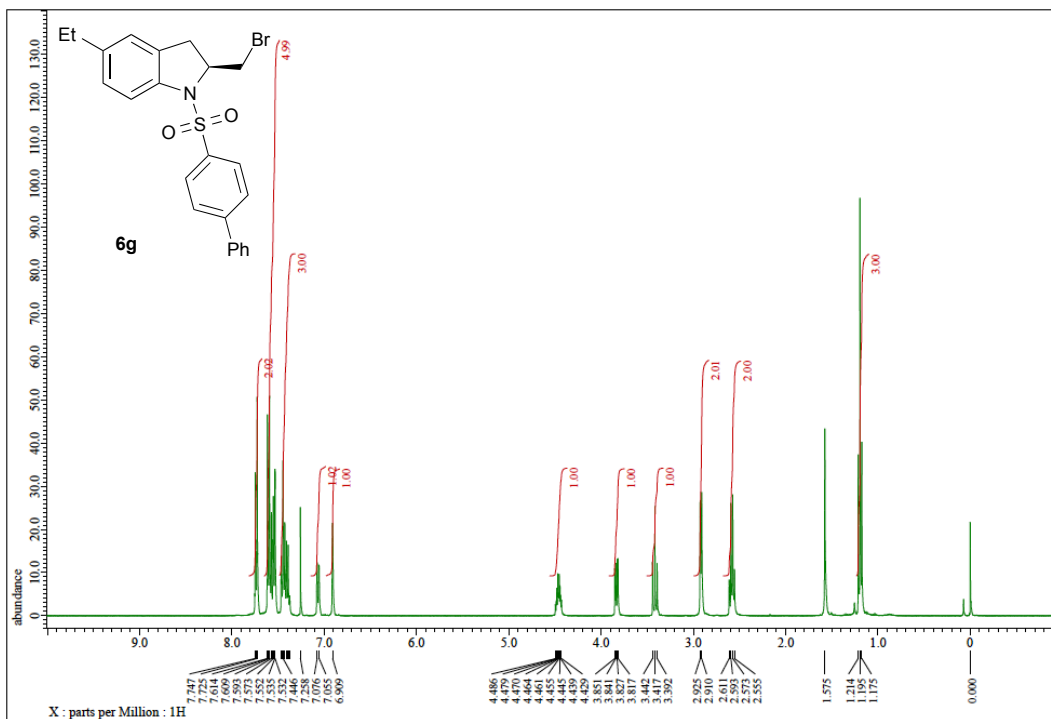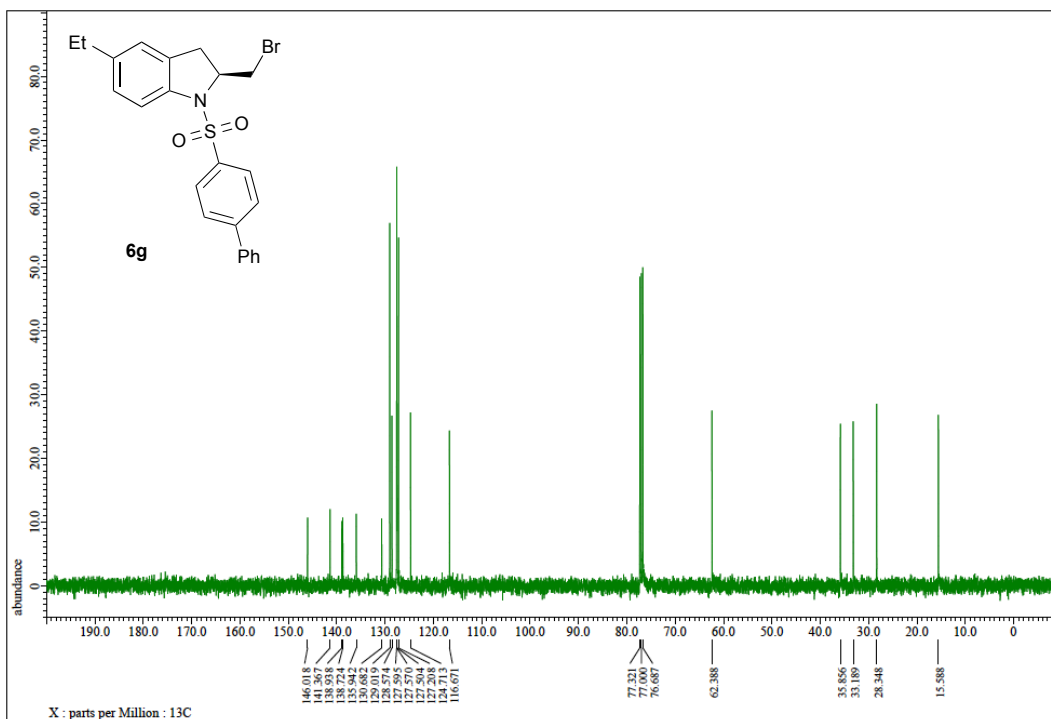

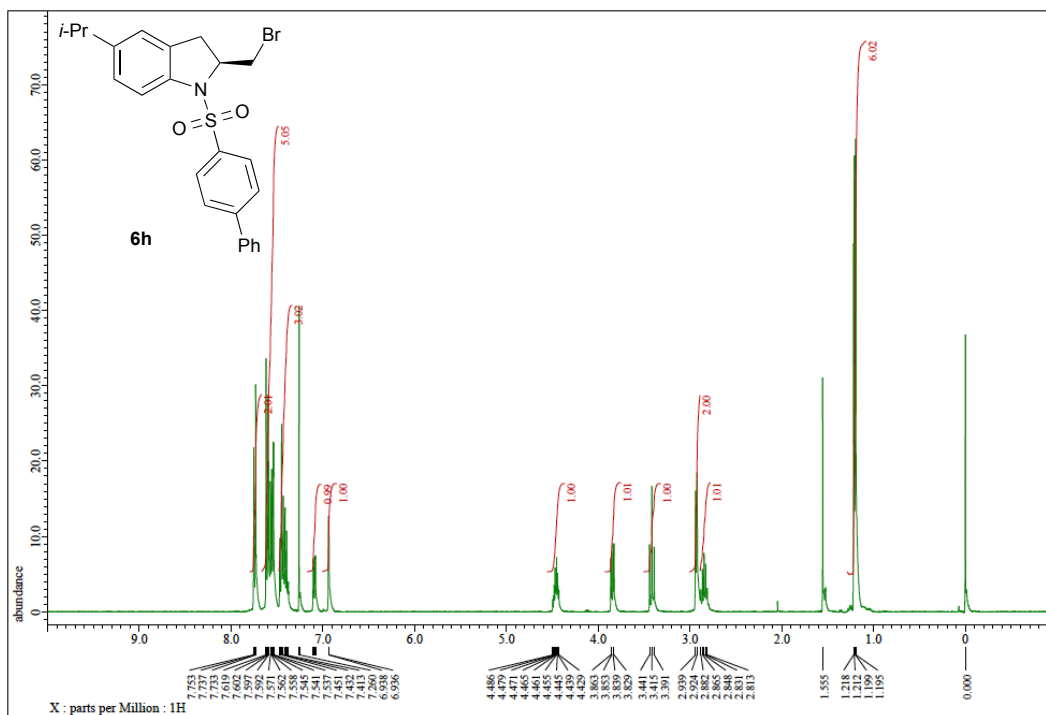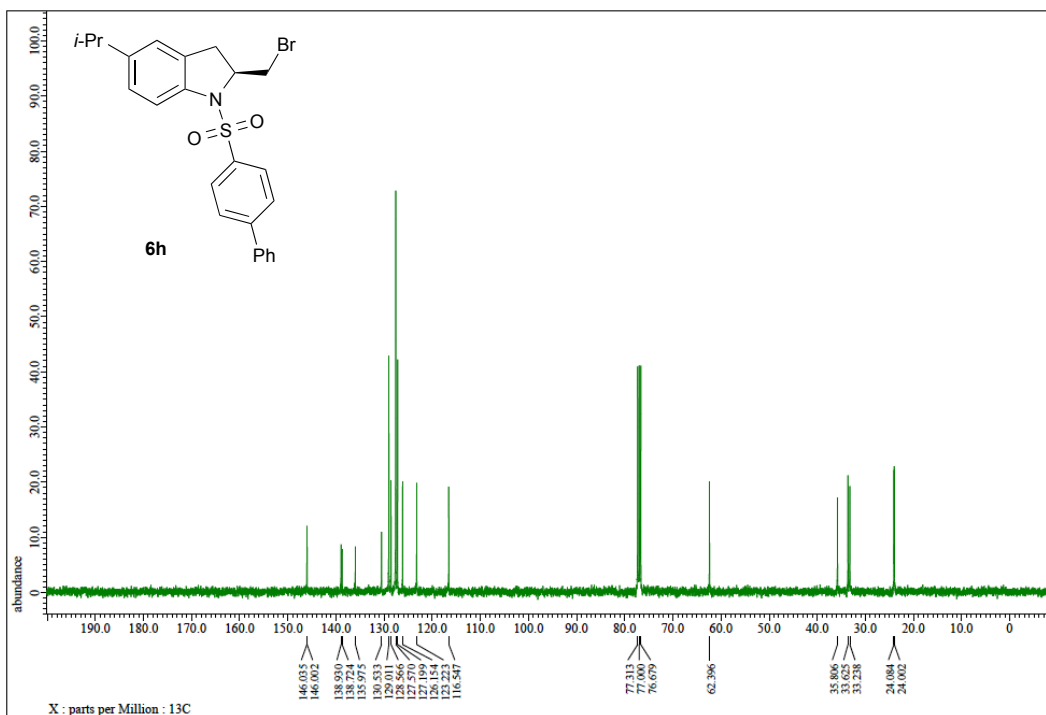

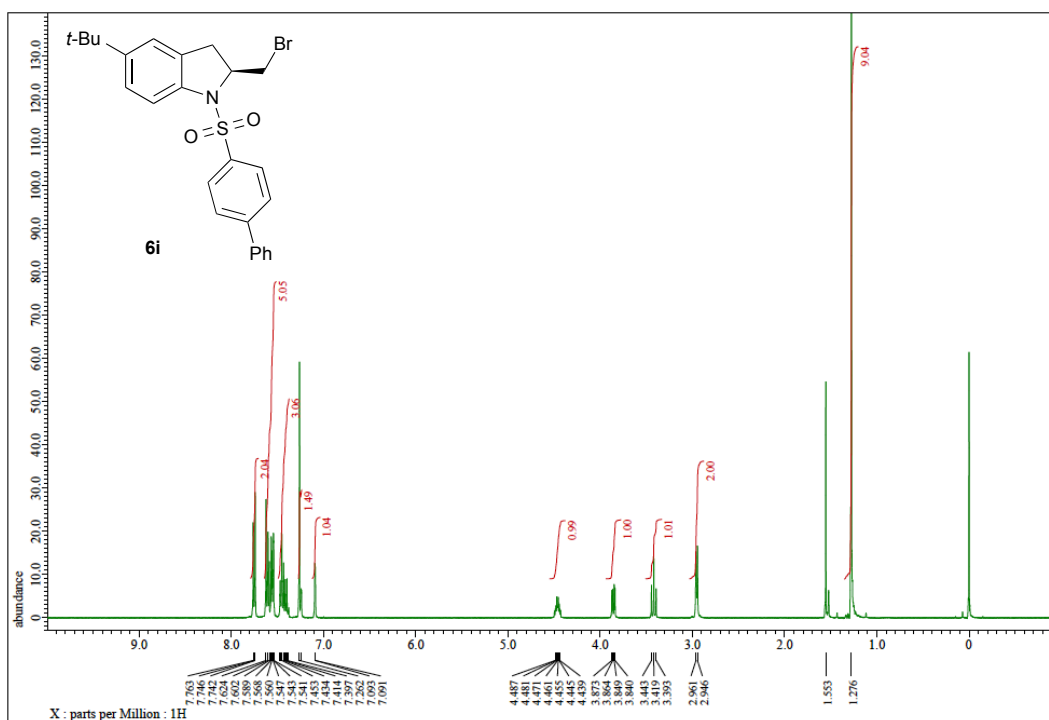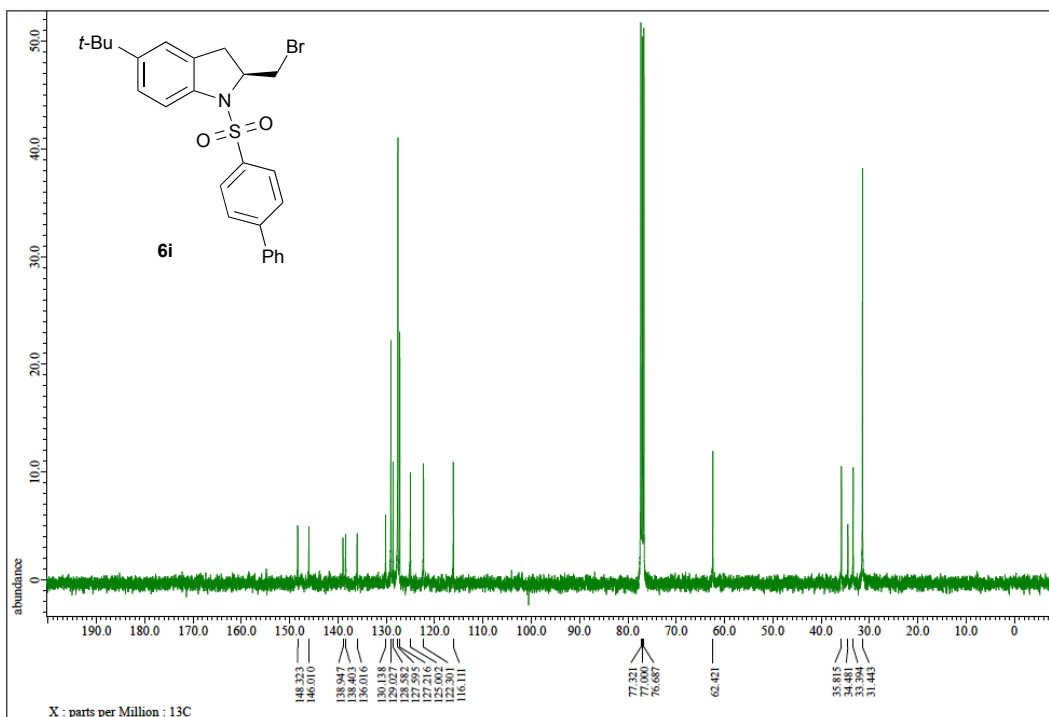

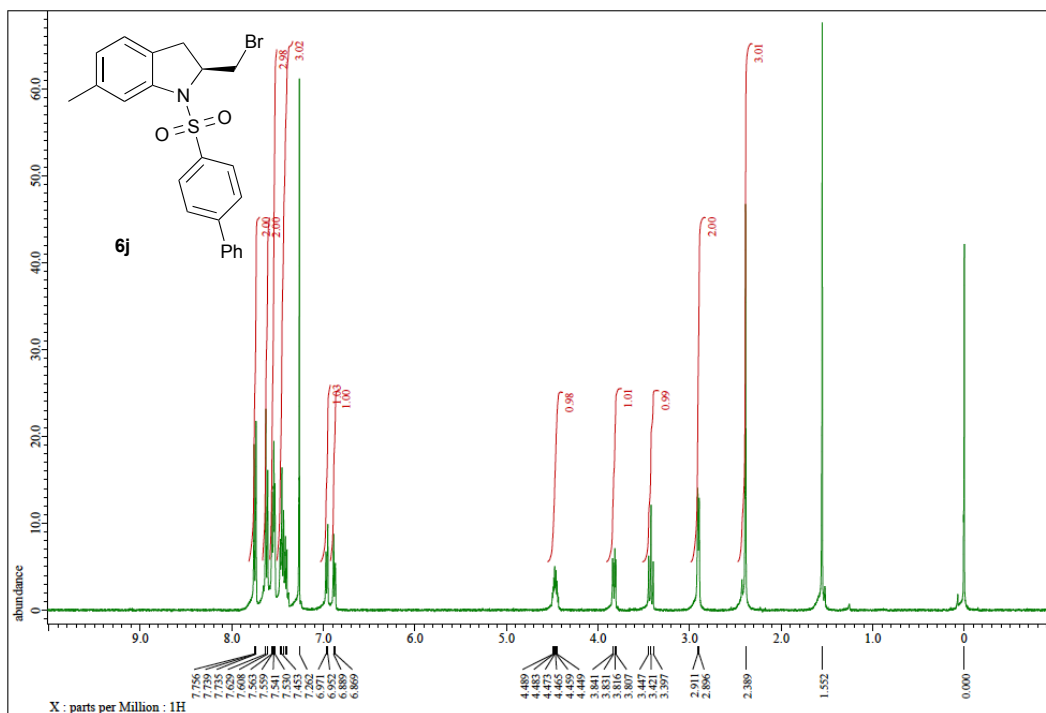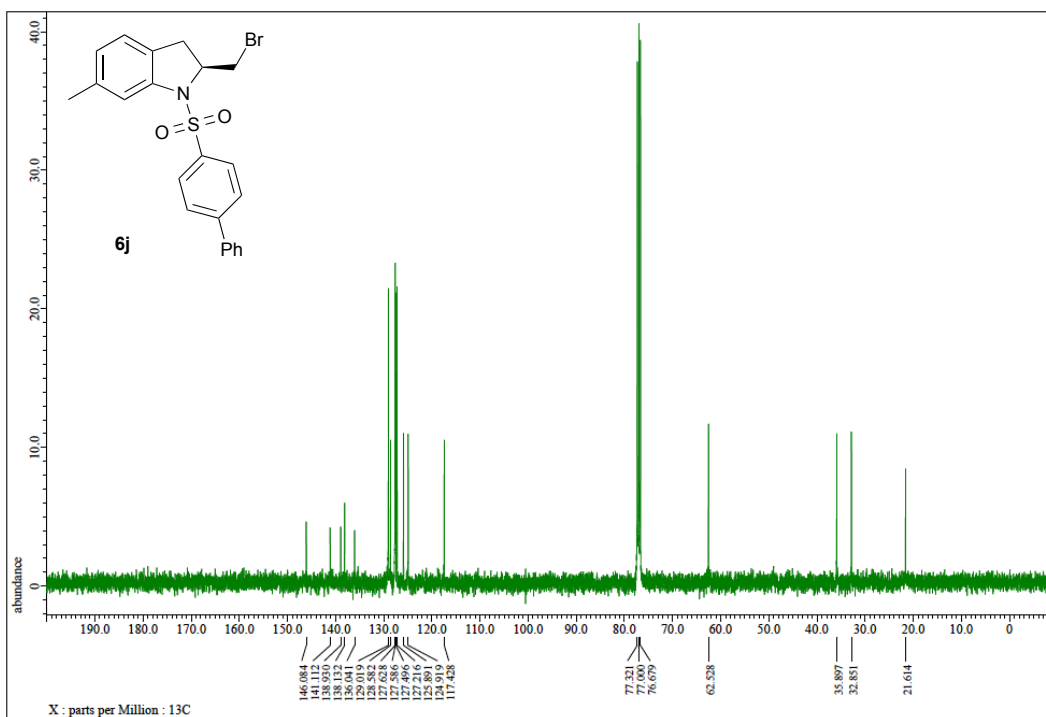

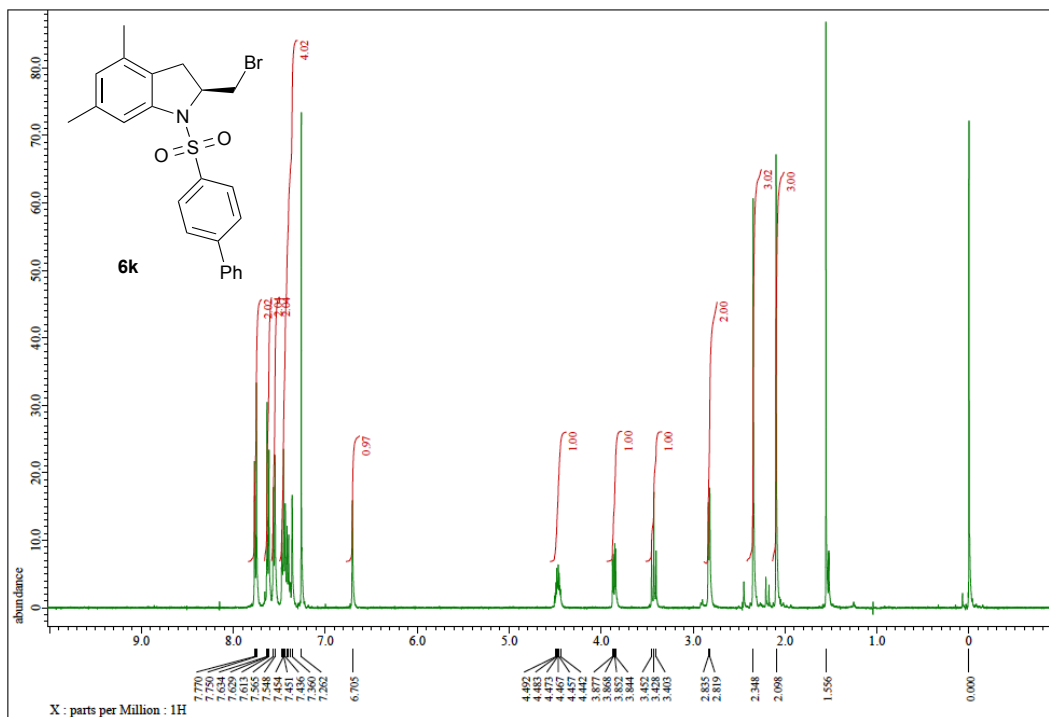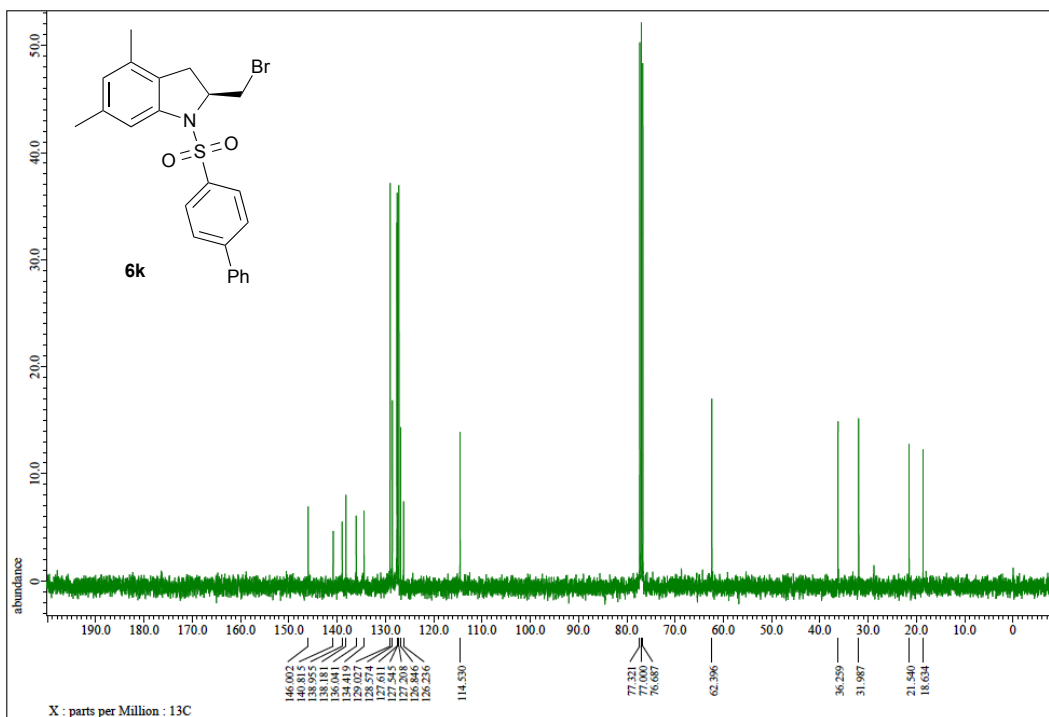

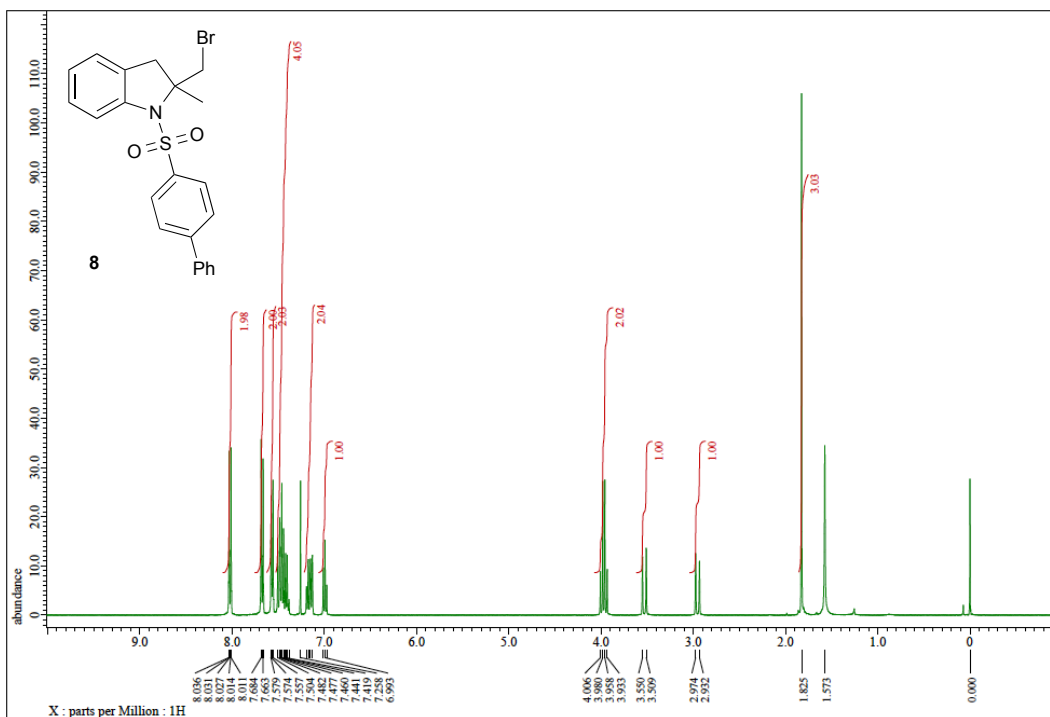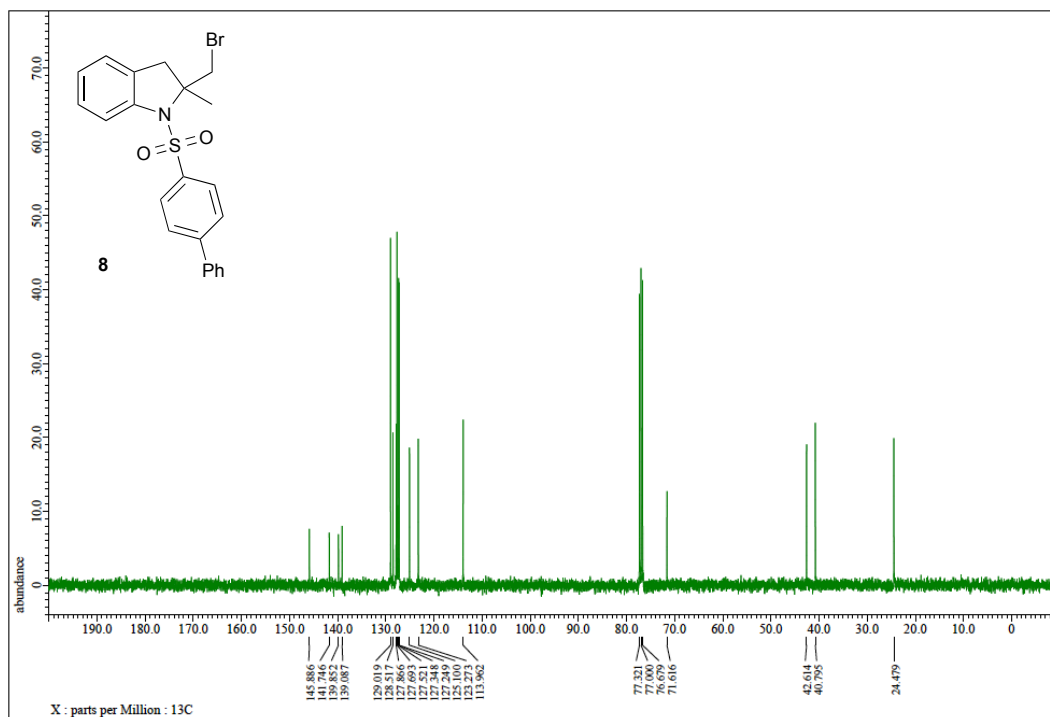

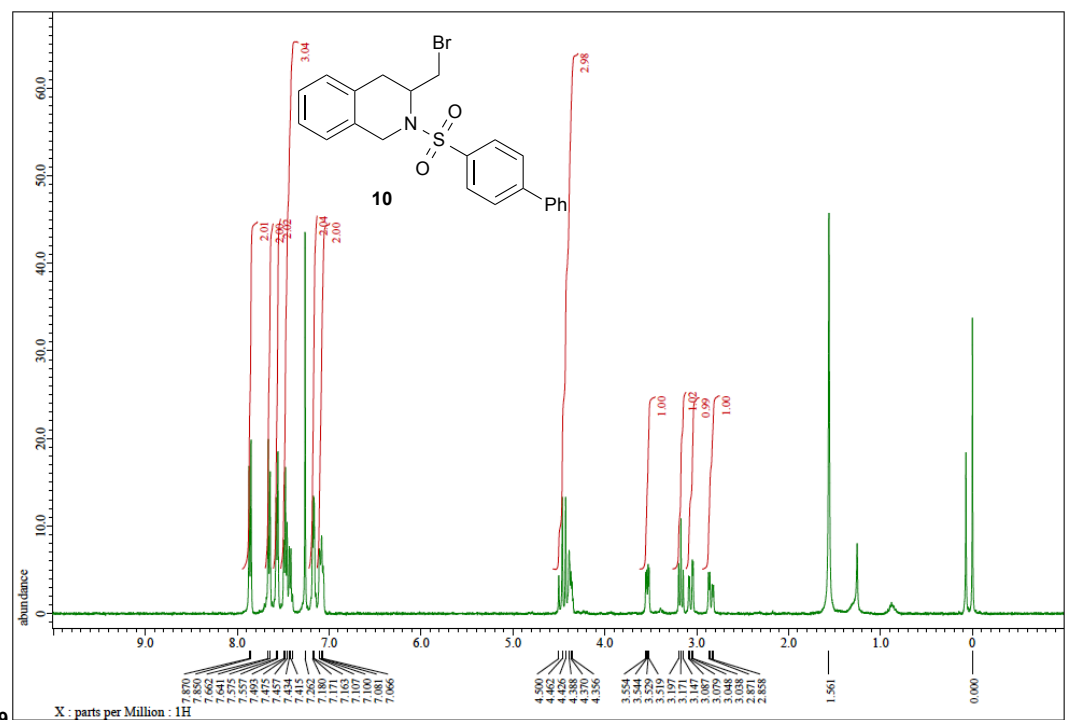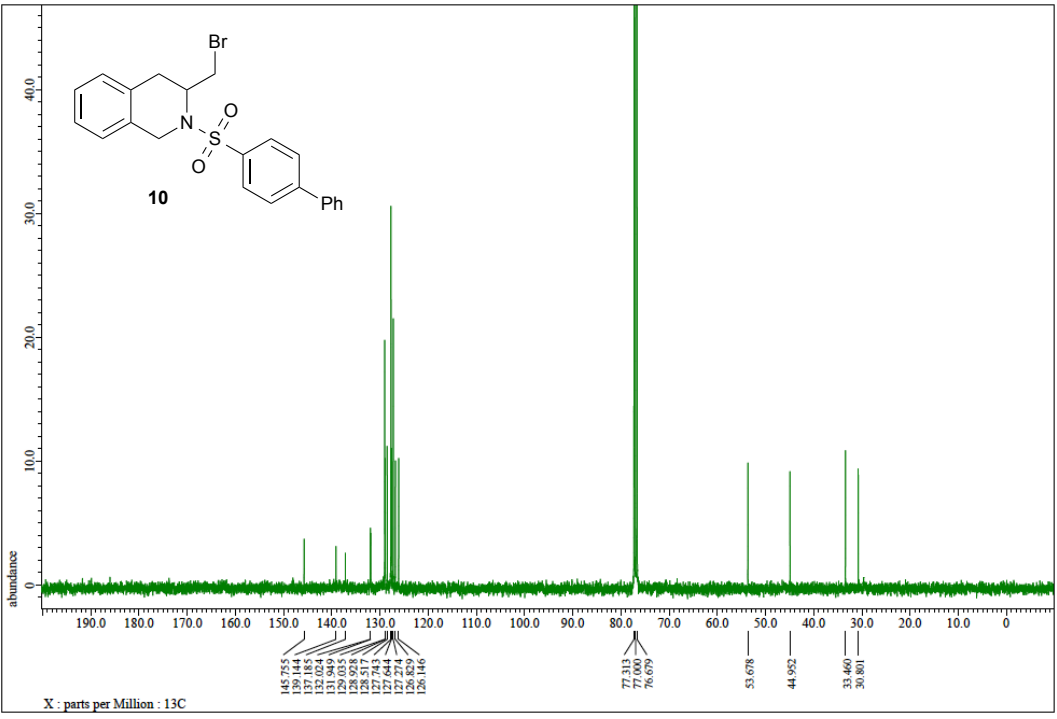



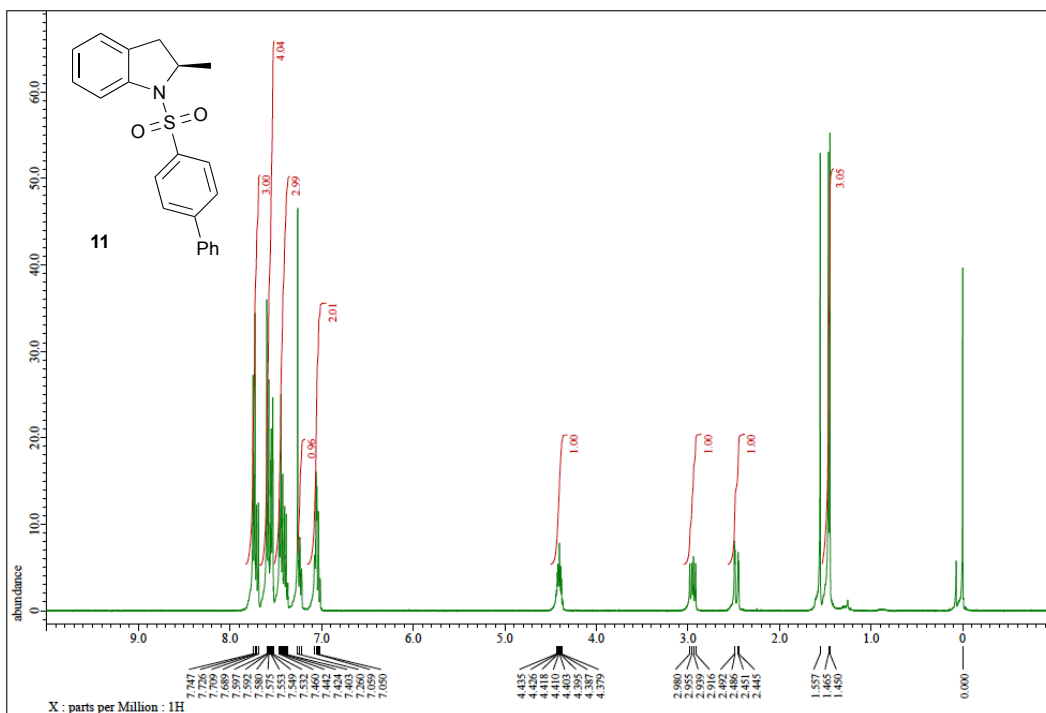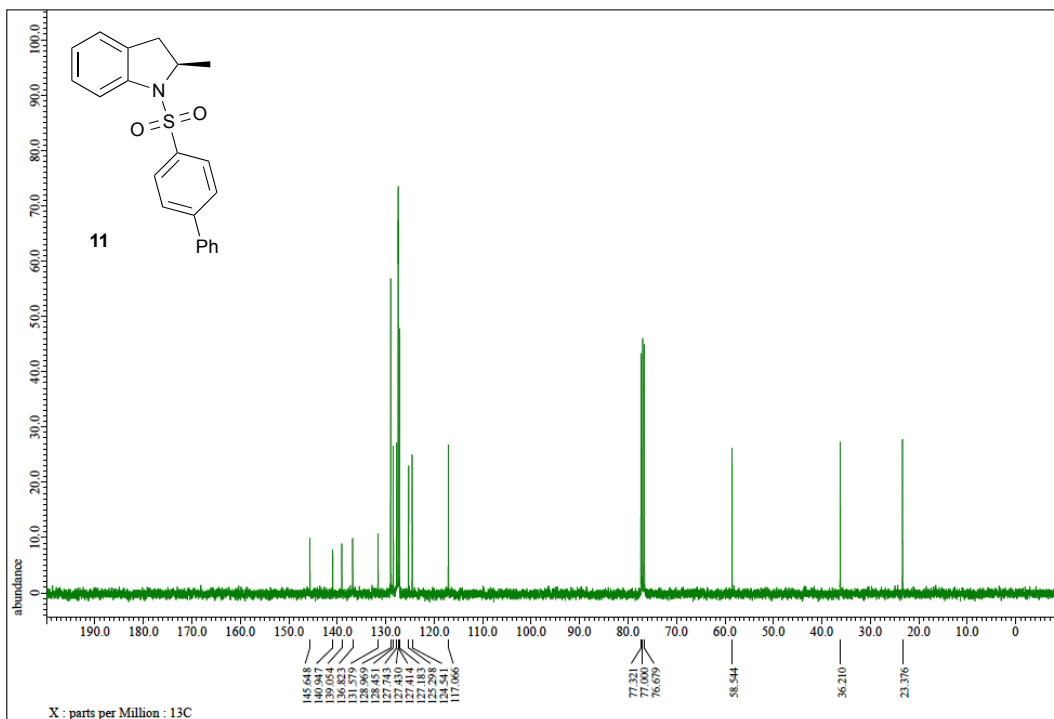

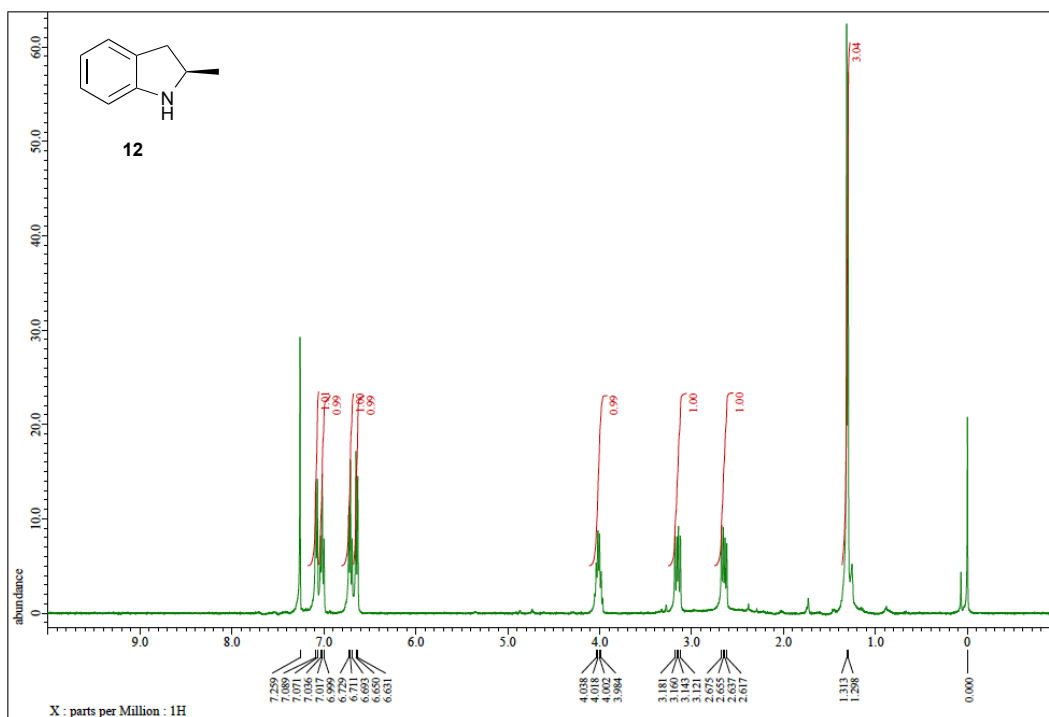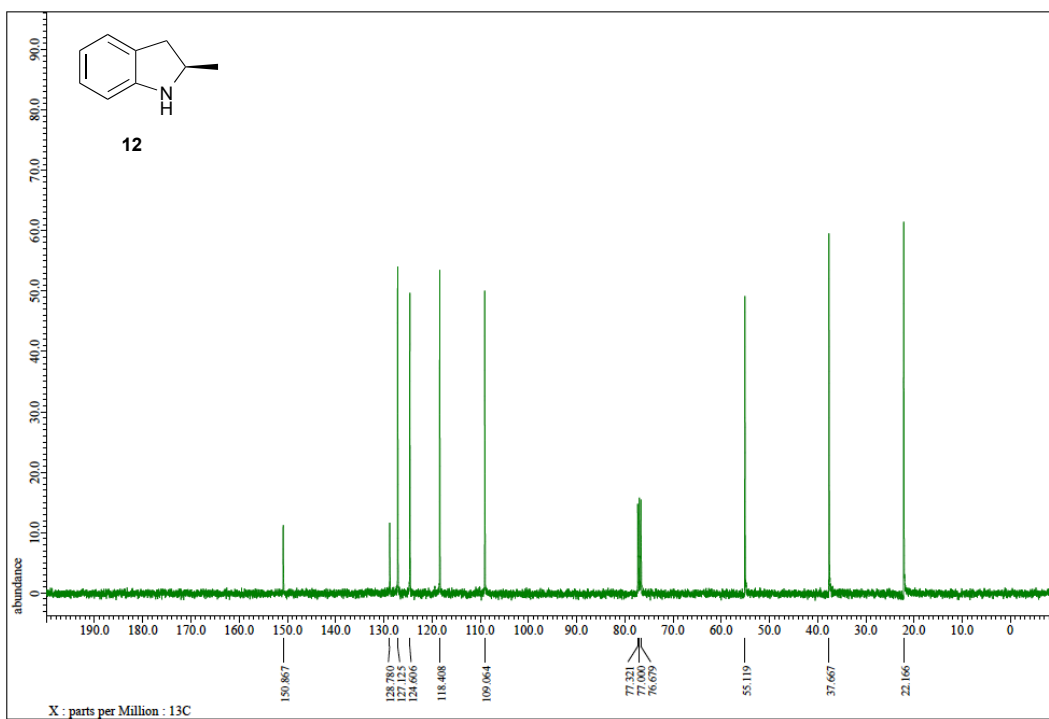

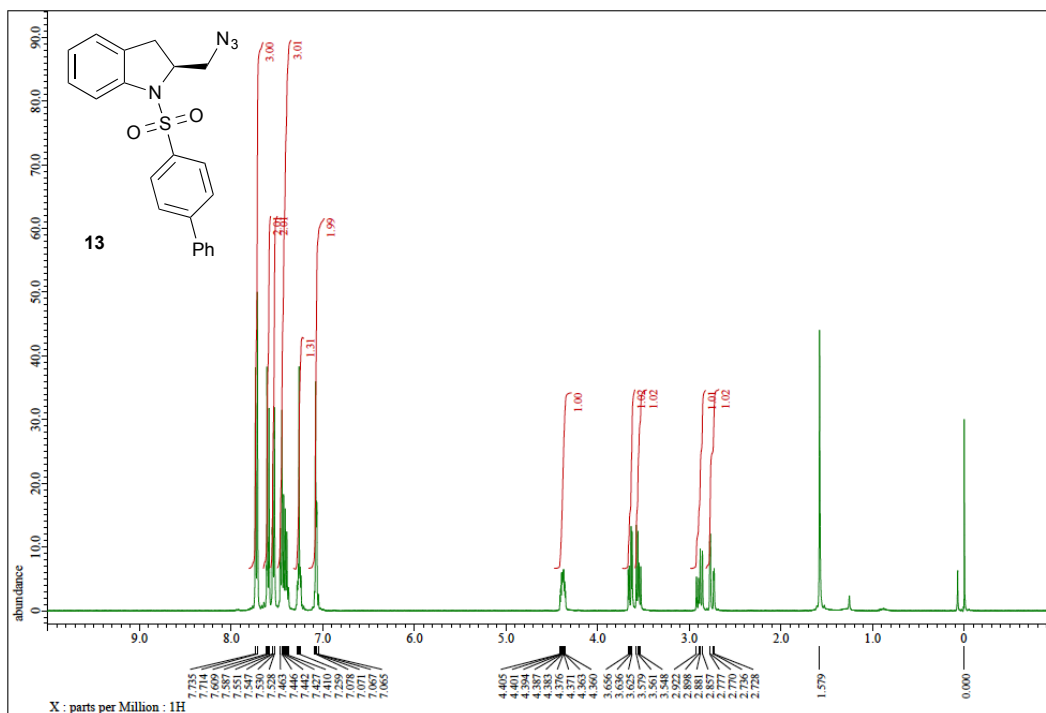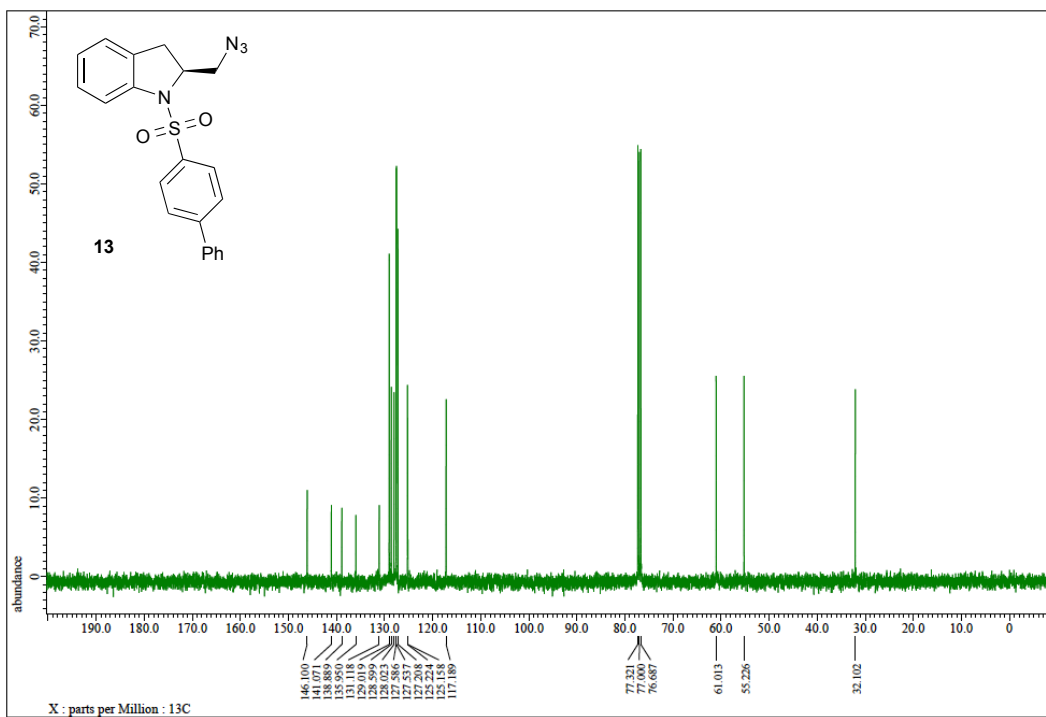

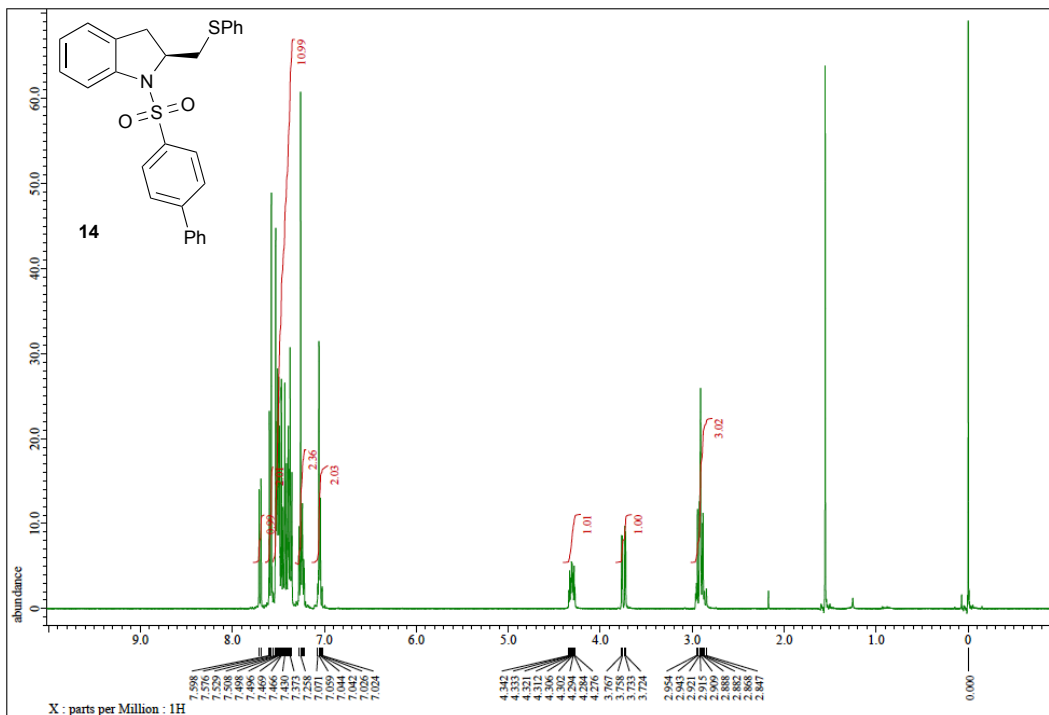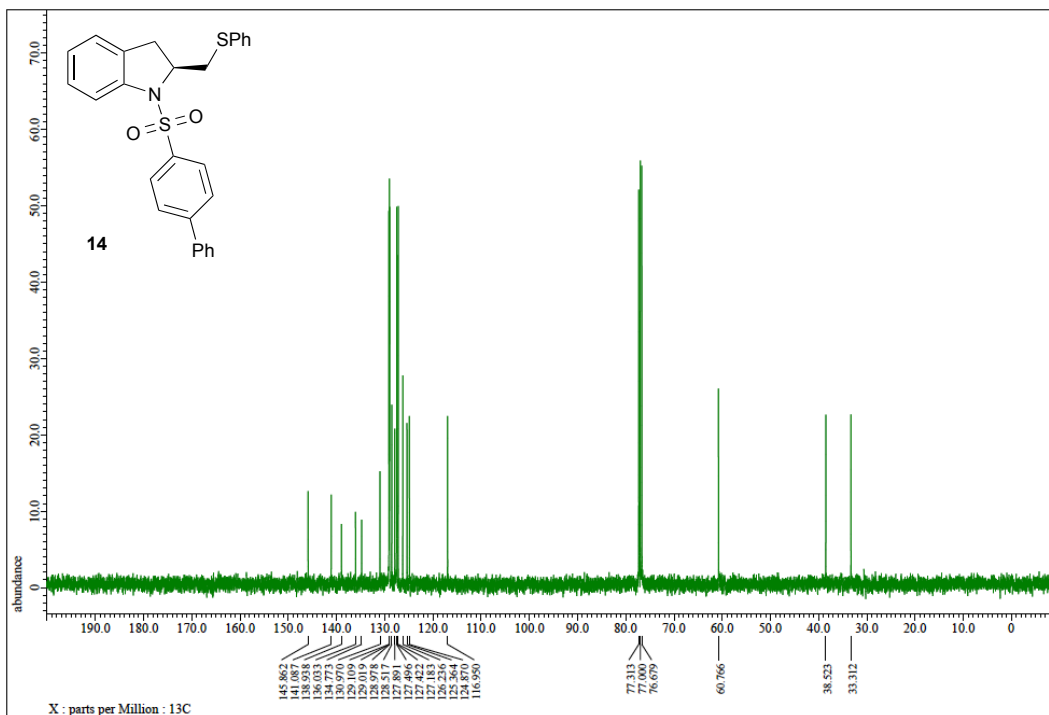

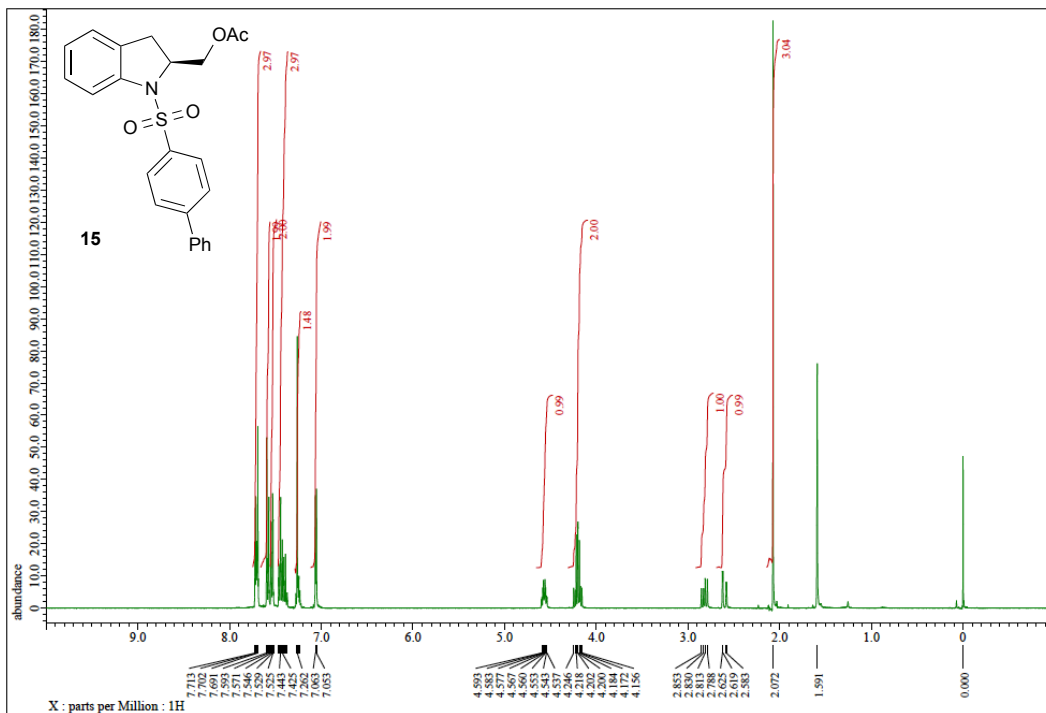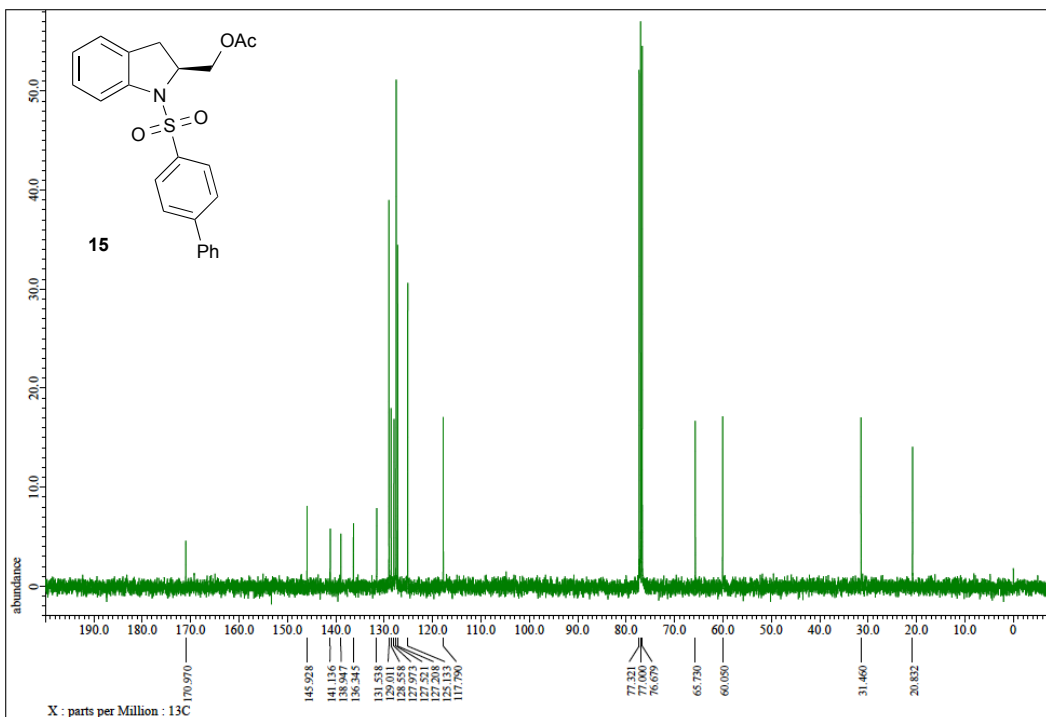

## HPLC Charts

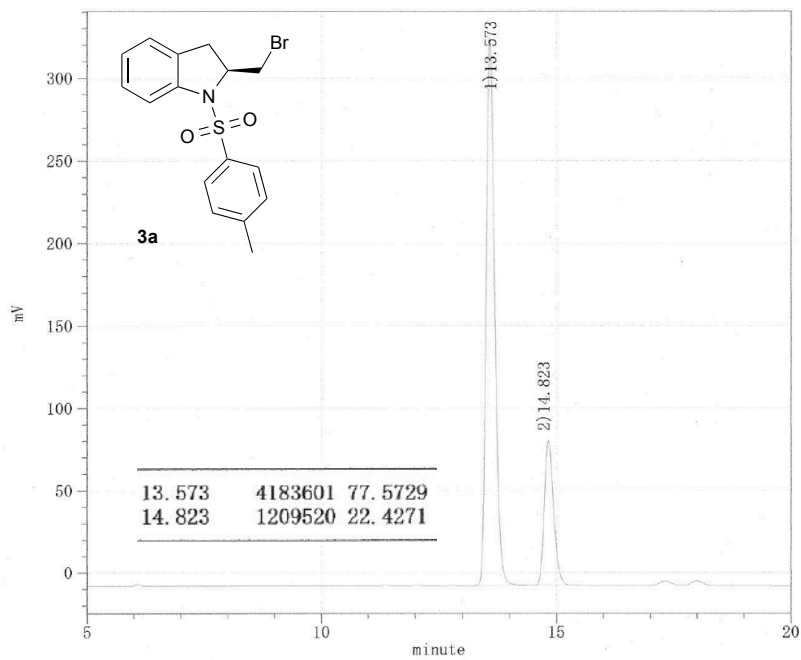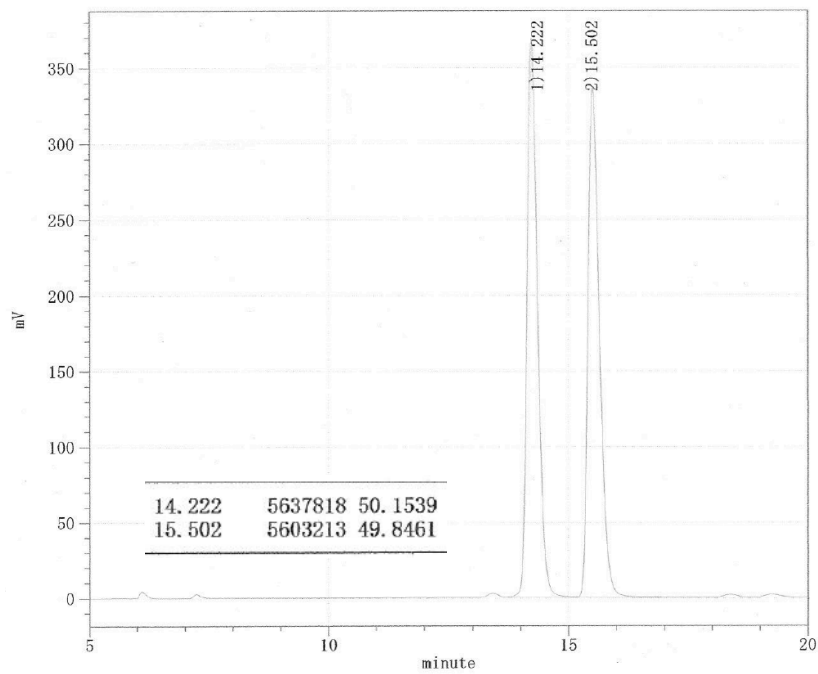

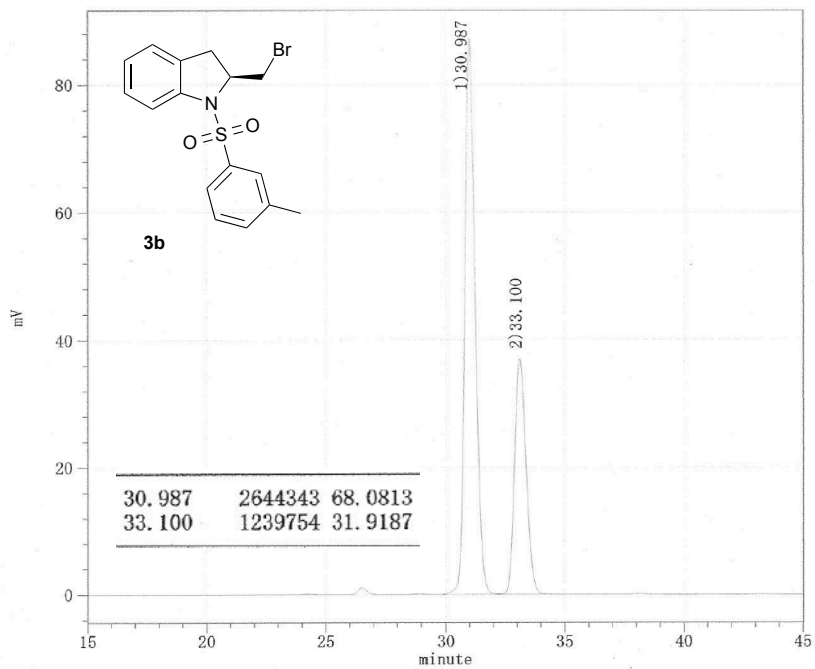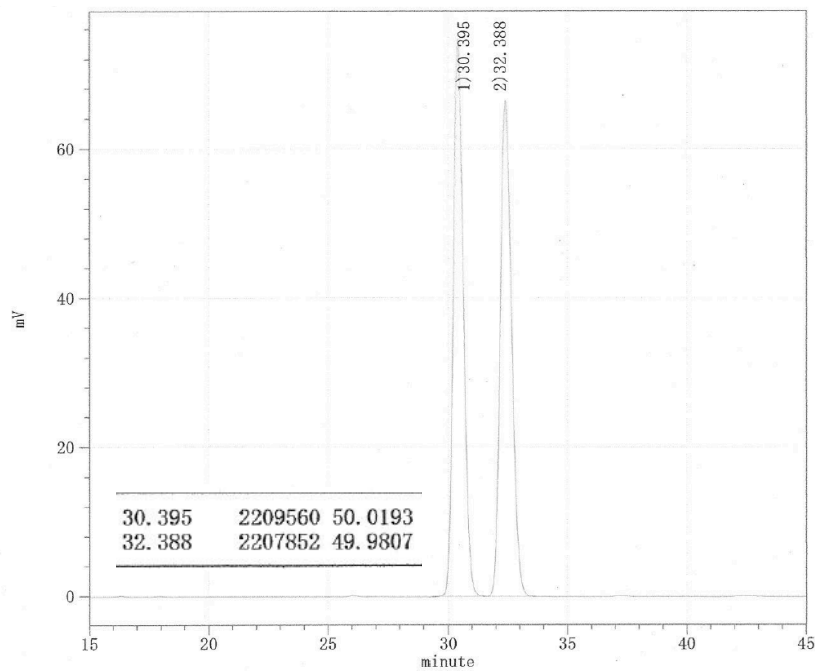

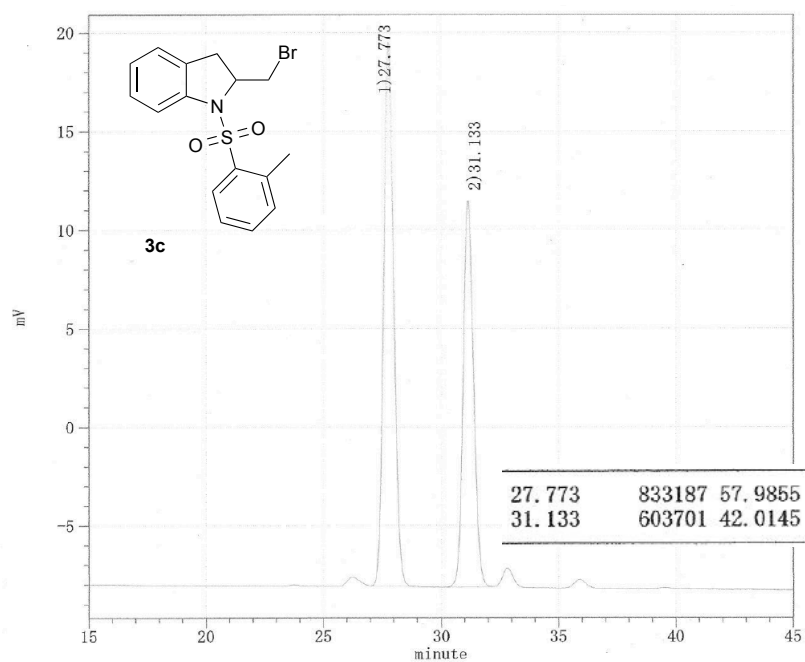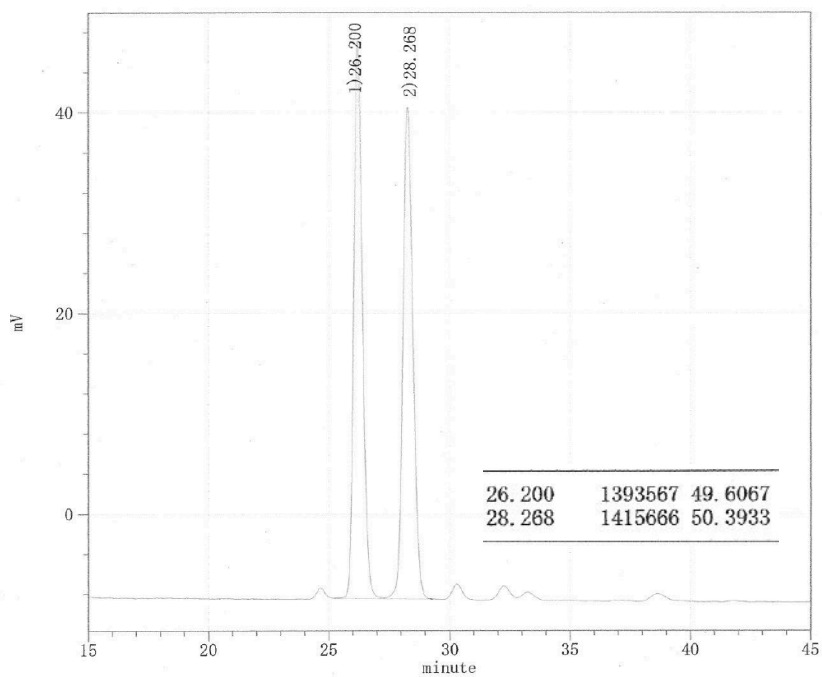



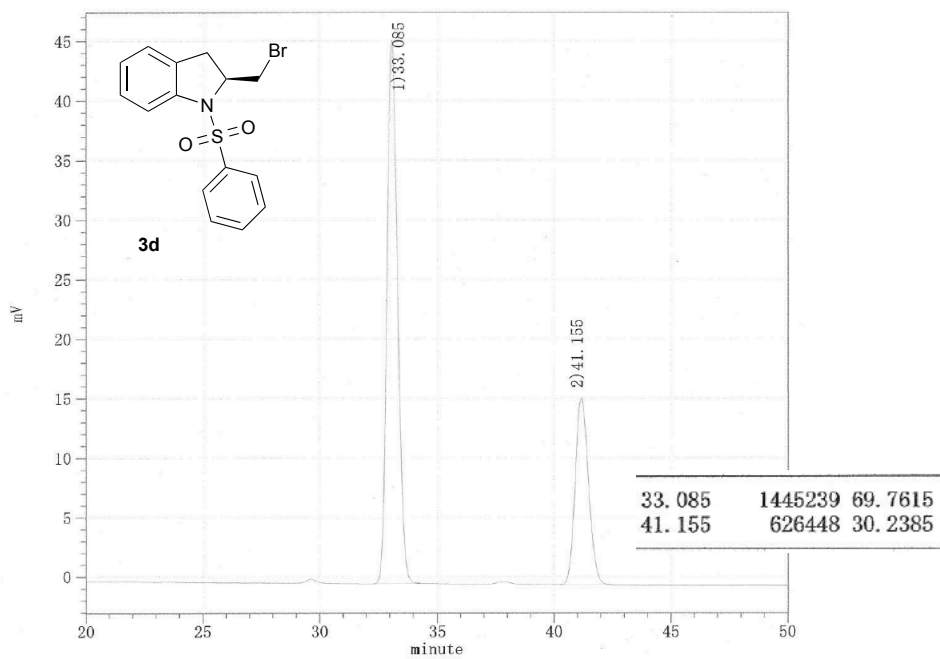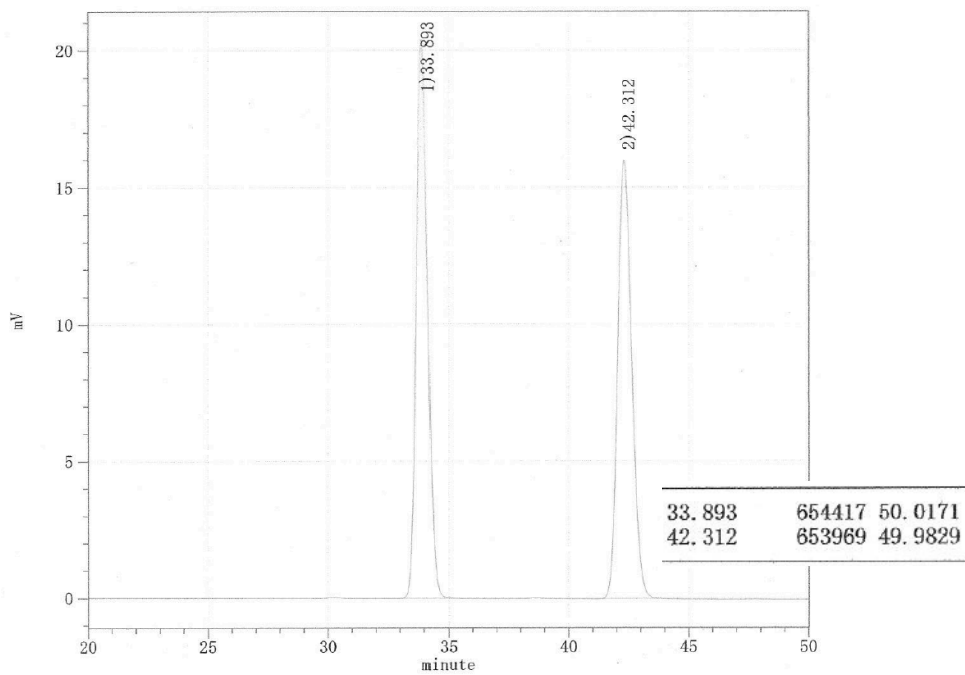

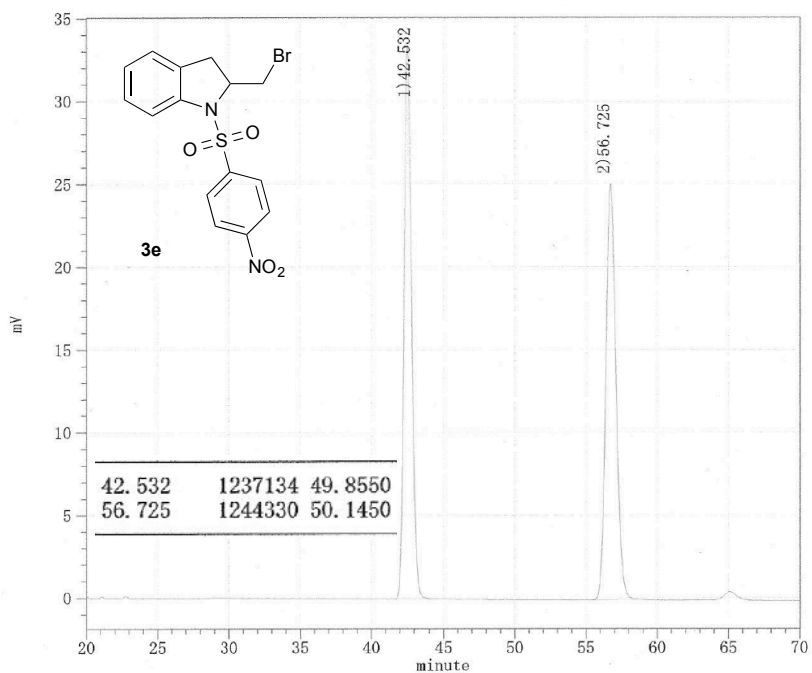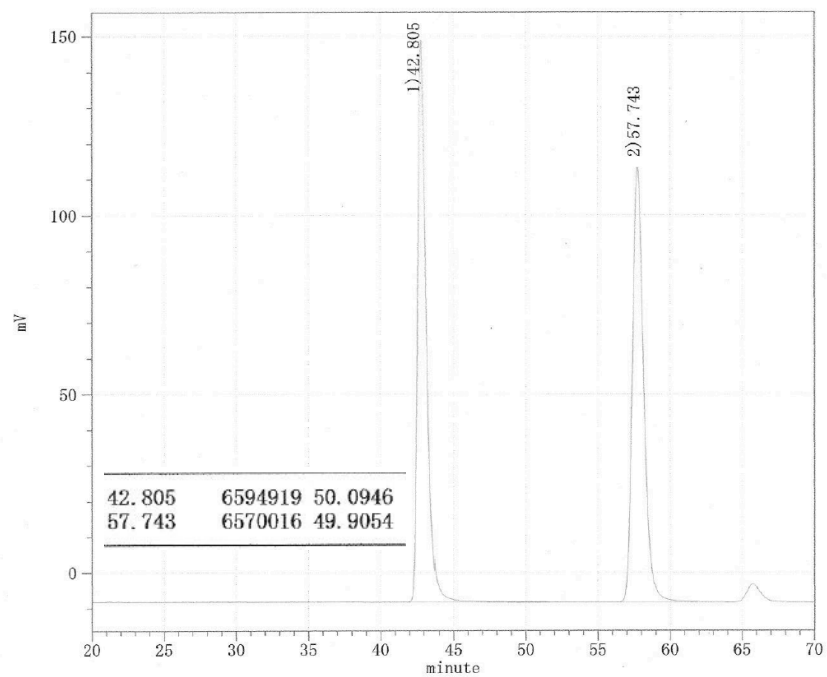

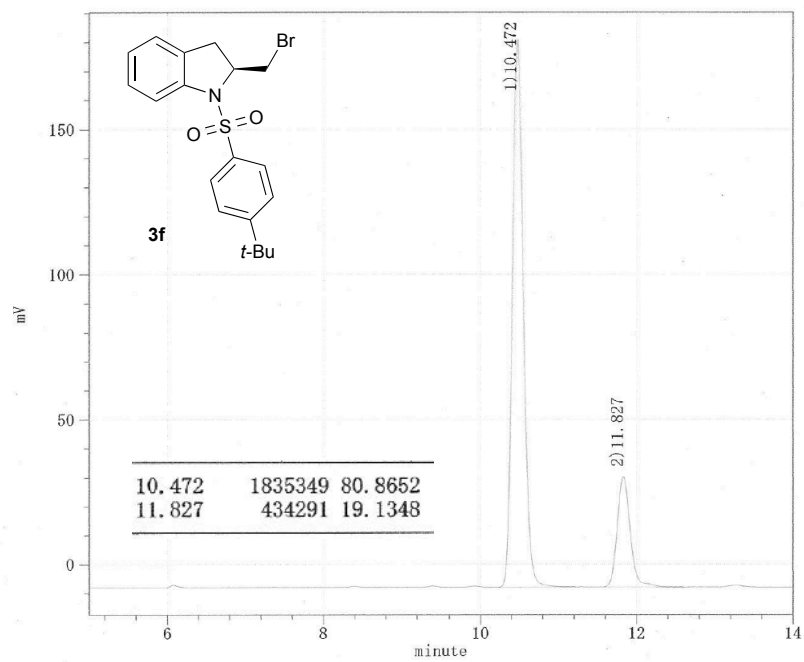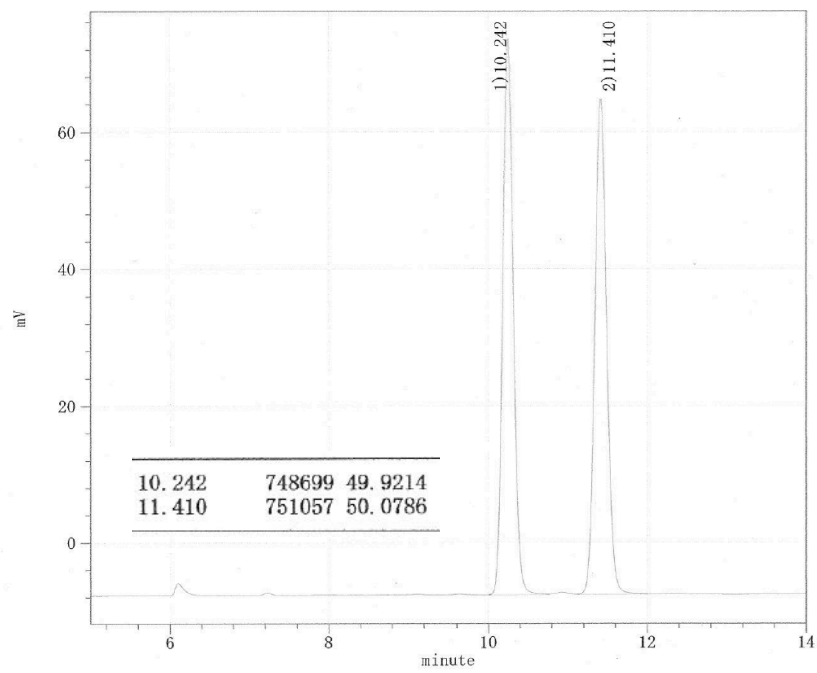

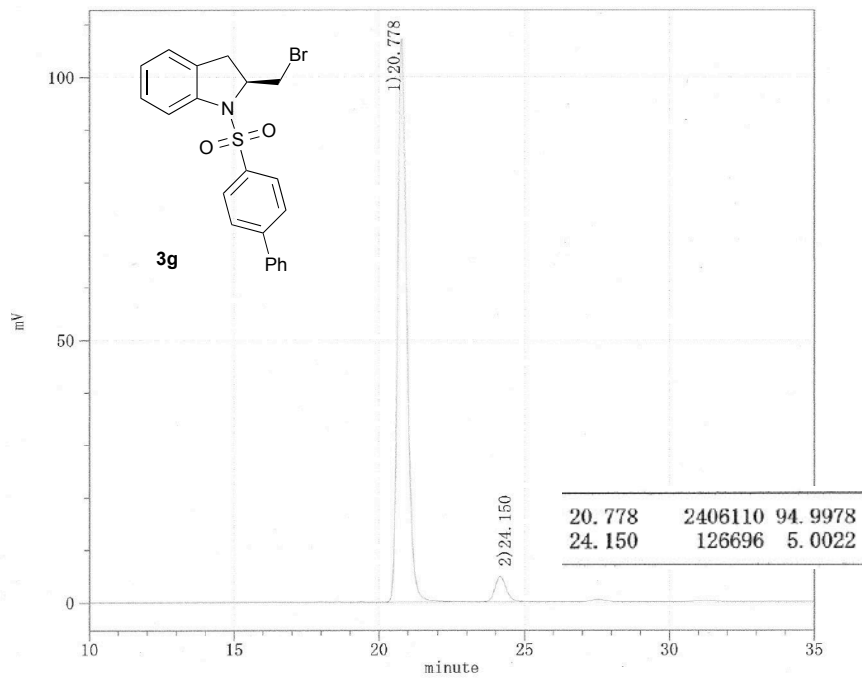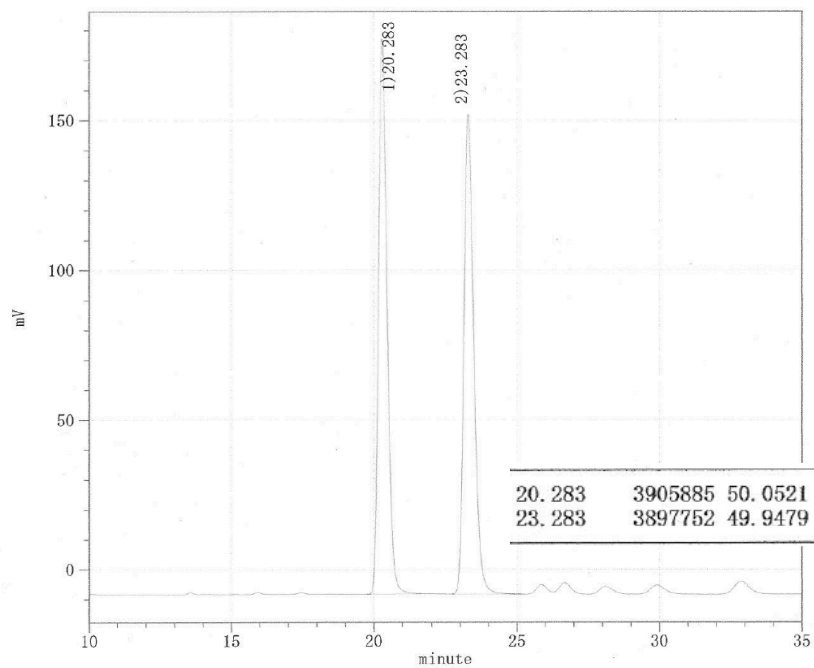

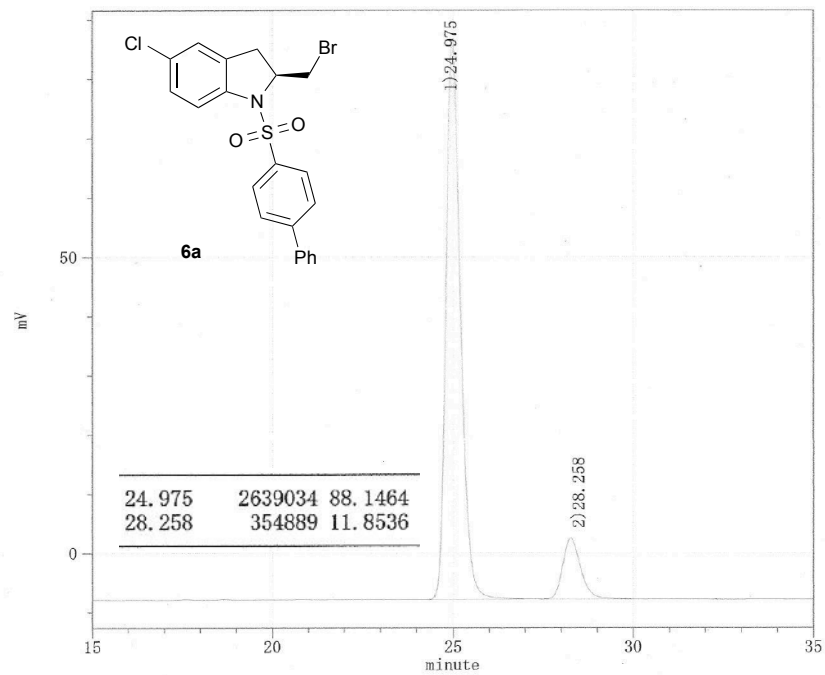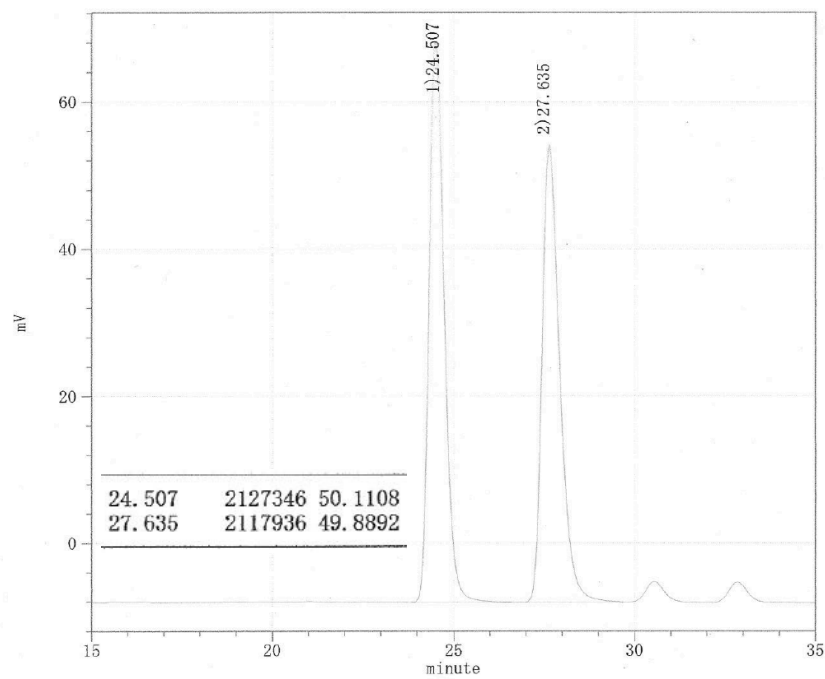

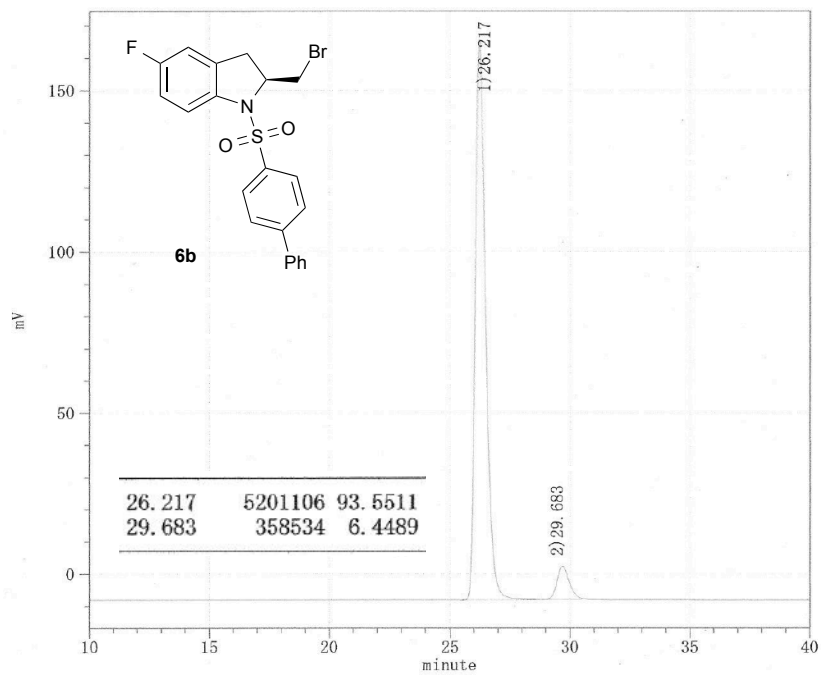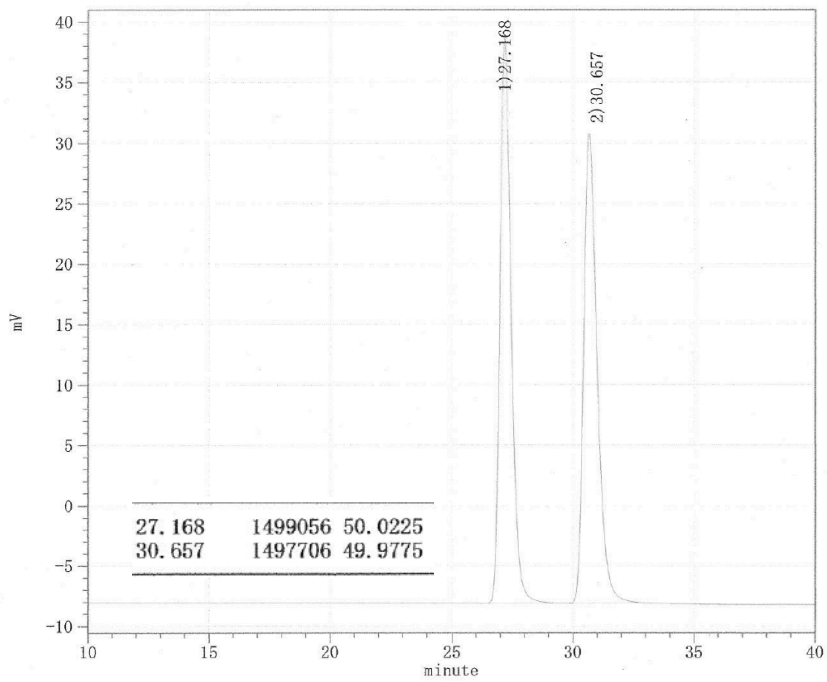

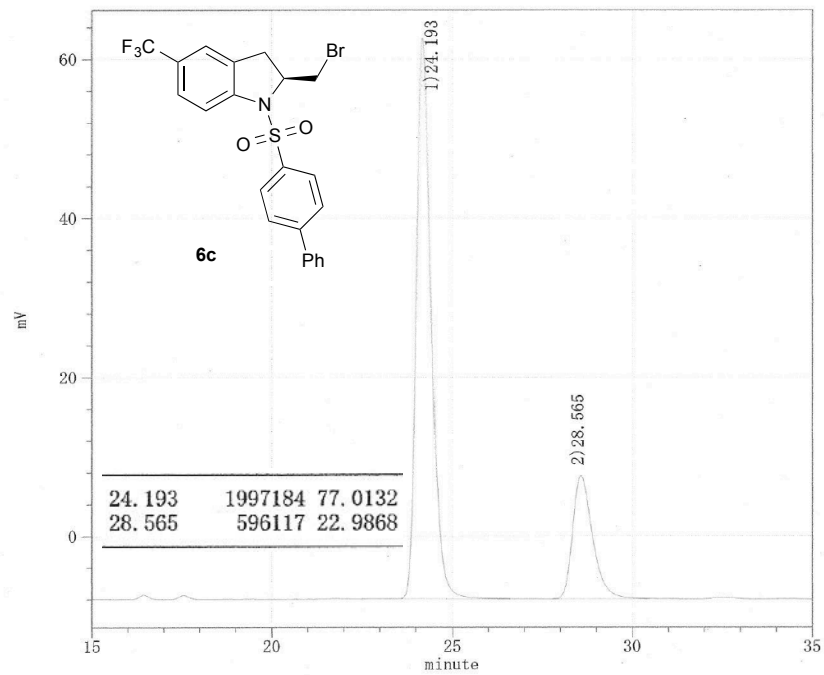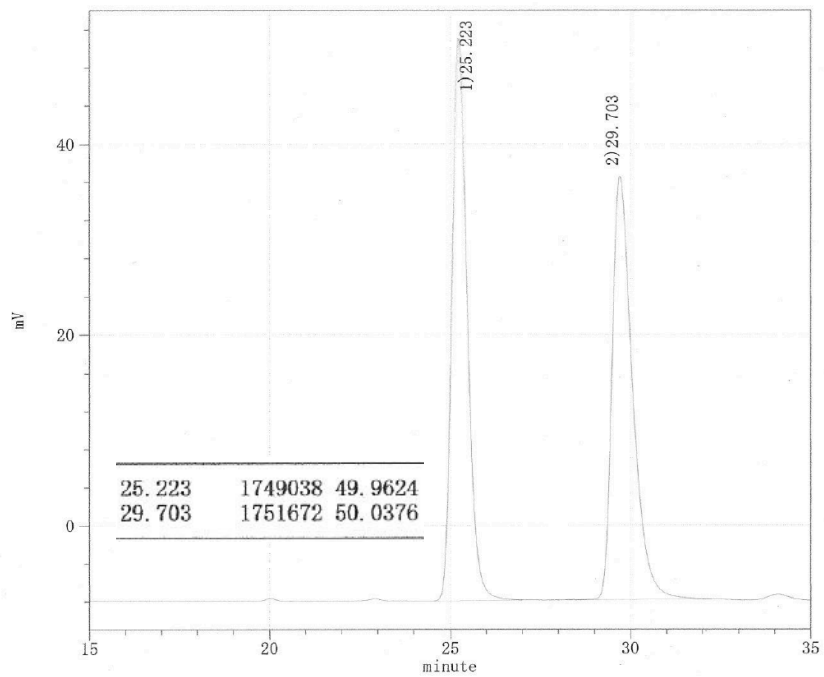

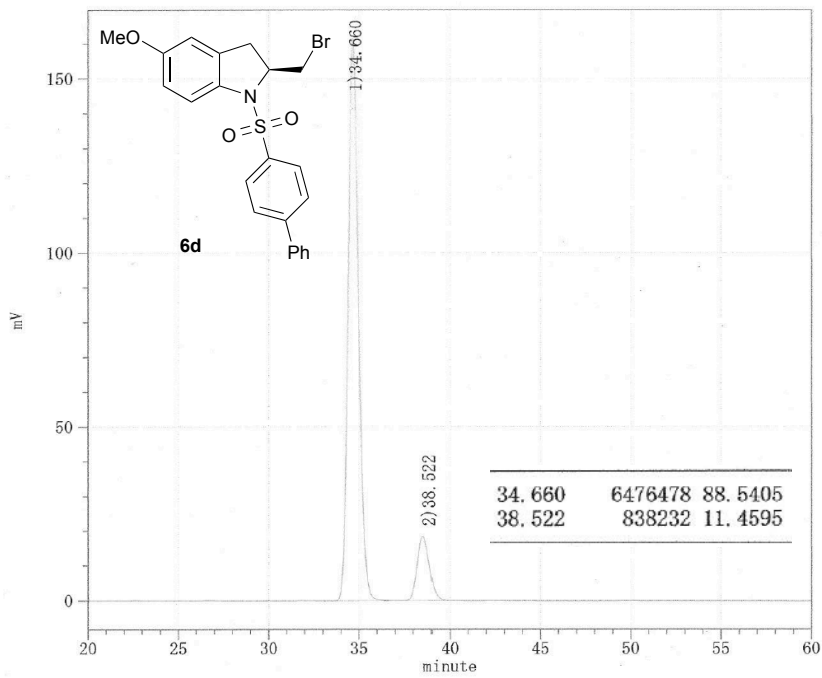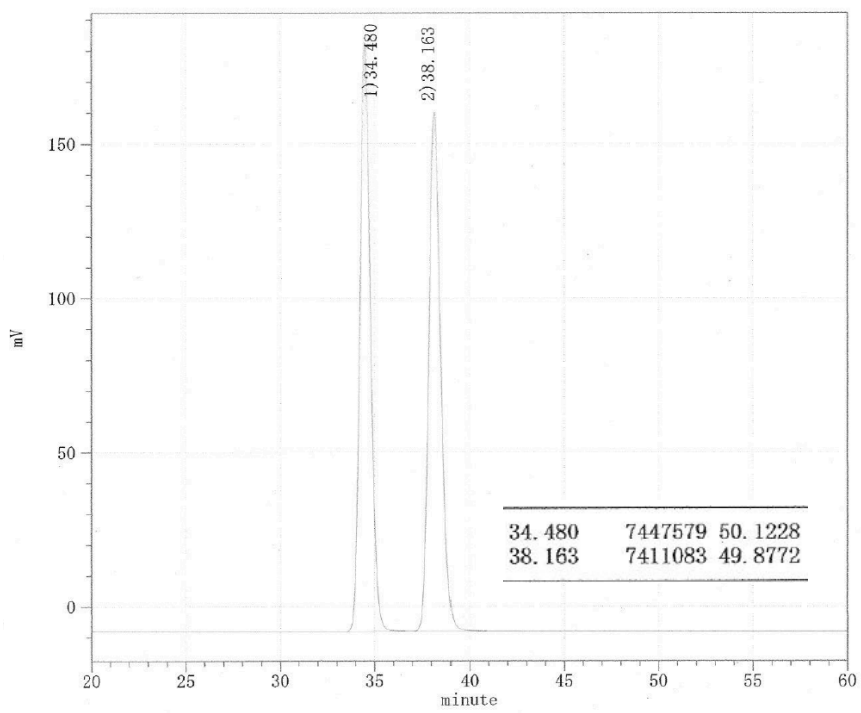



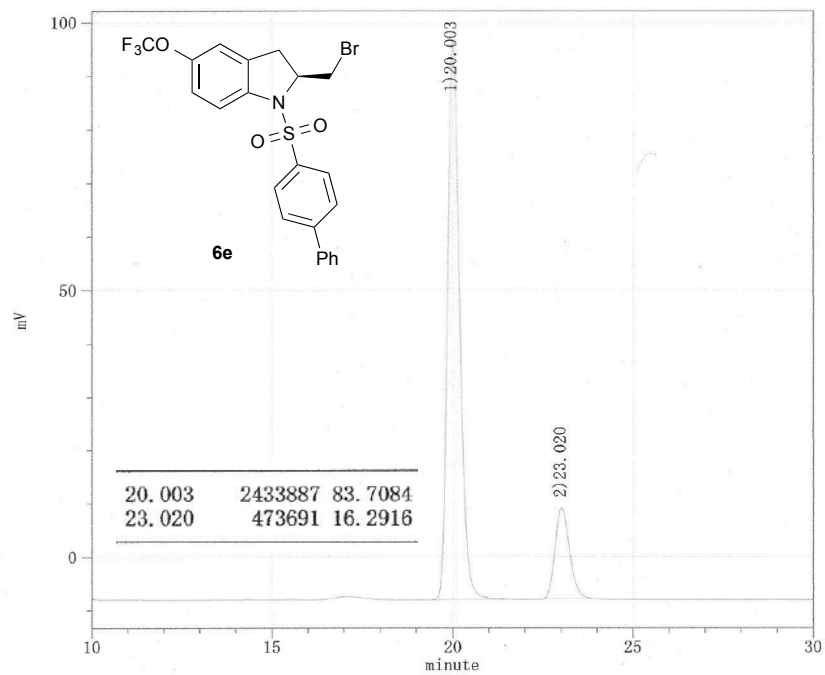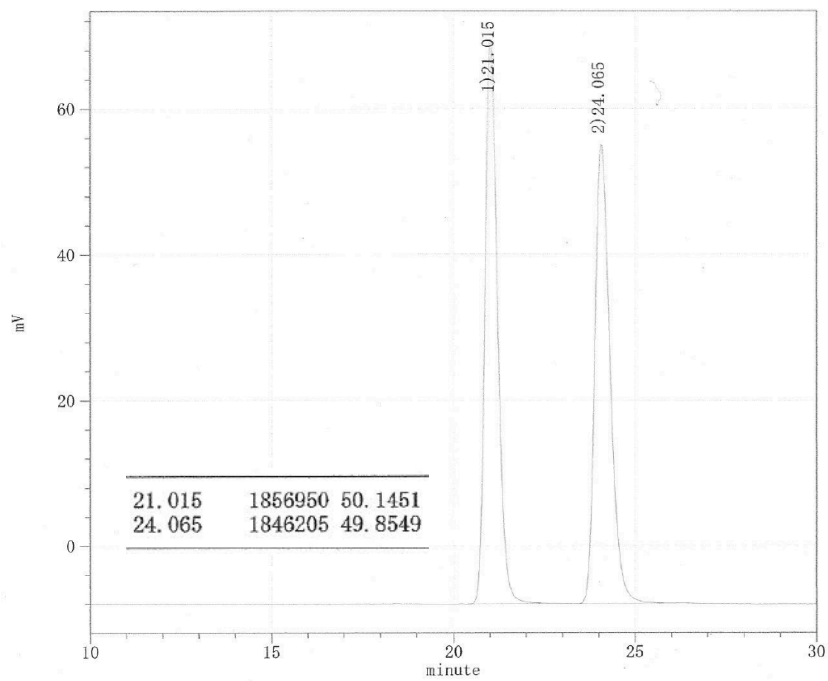

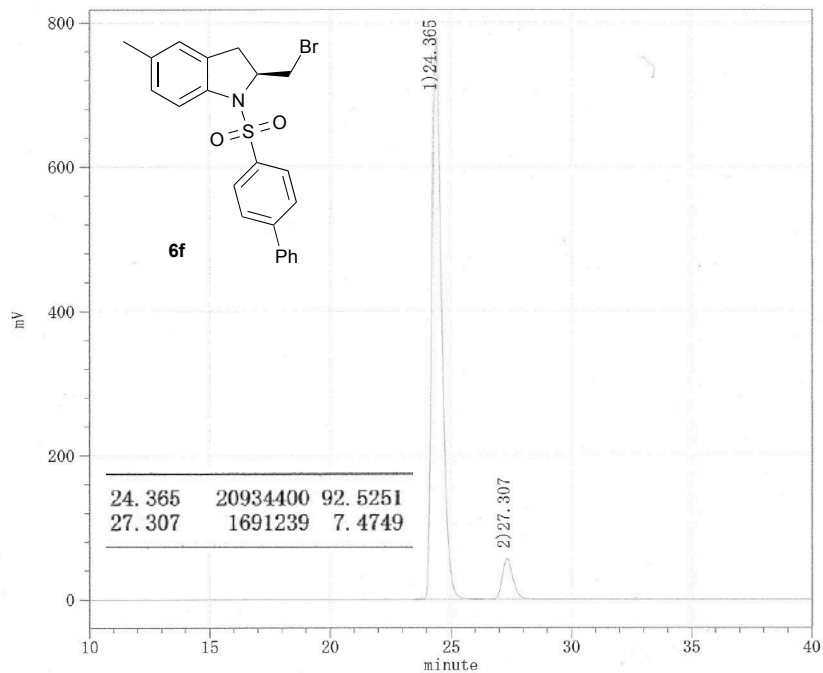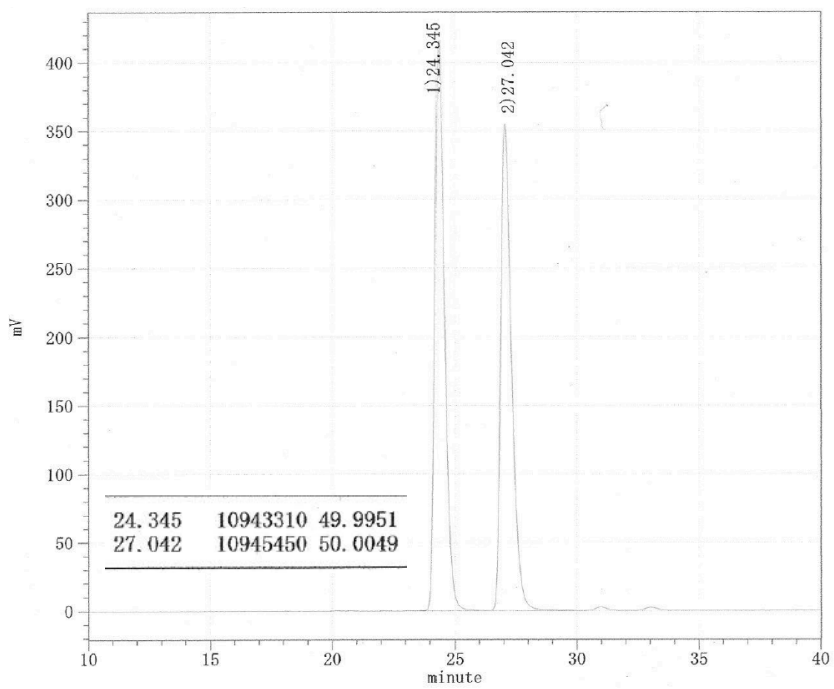

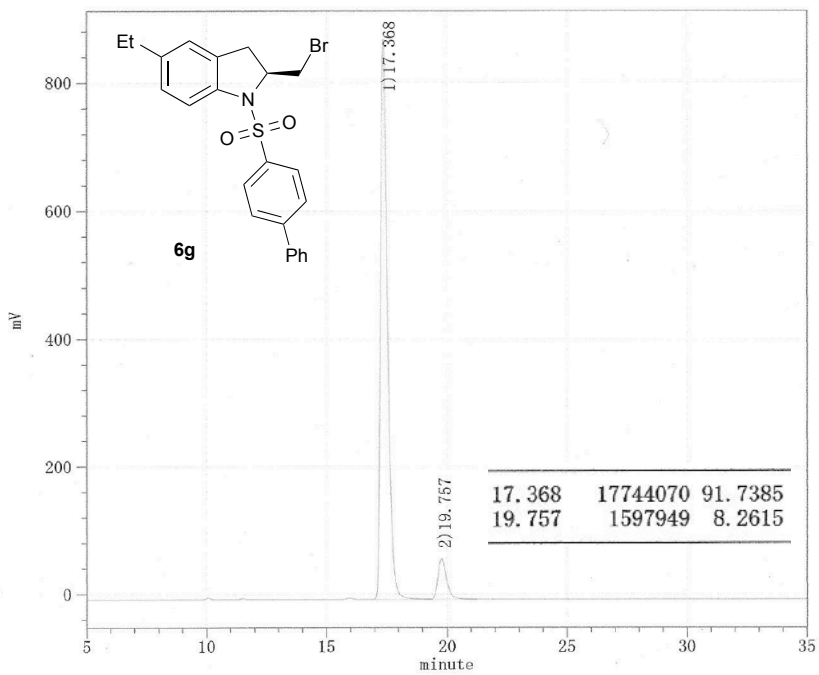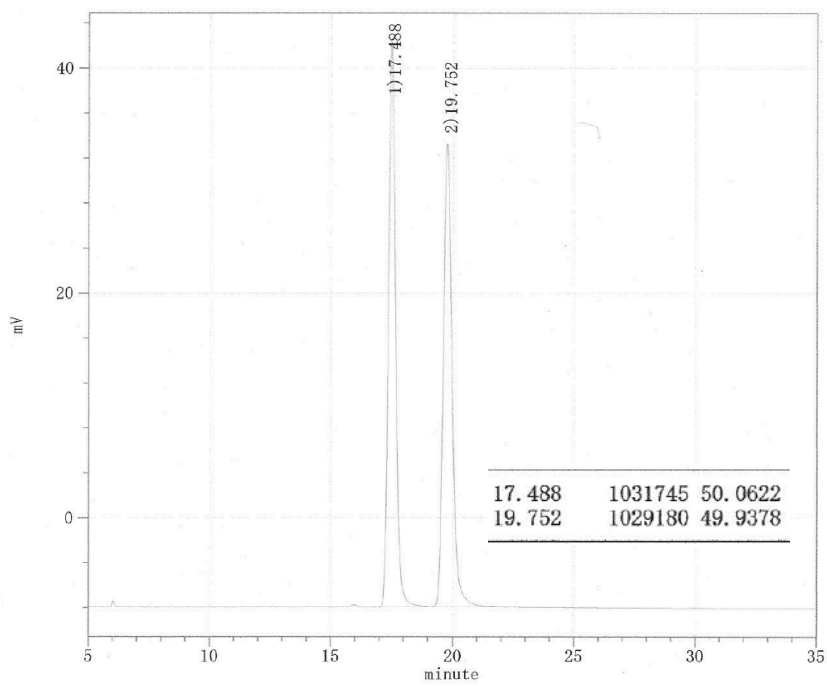

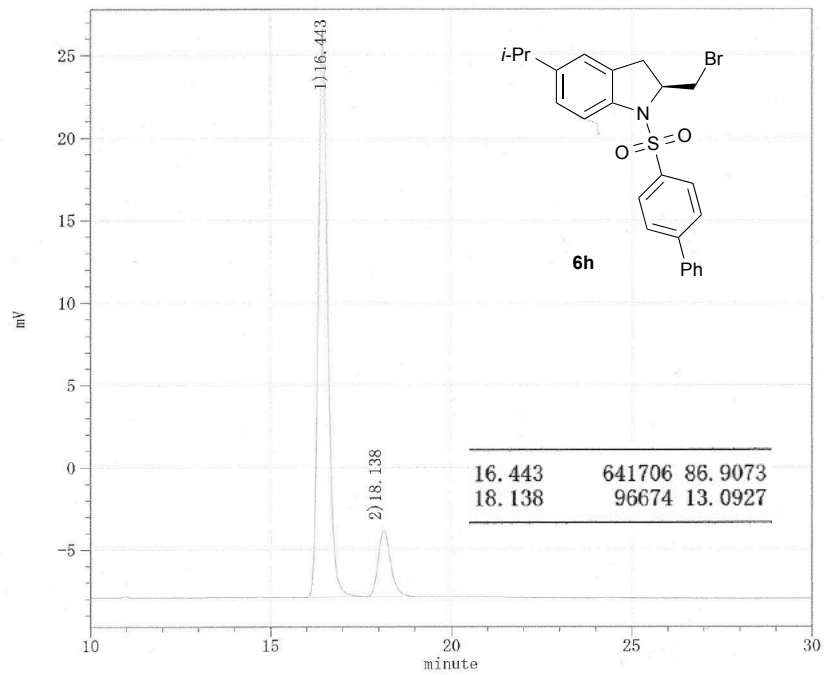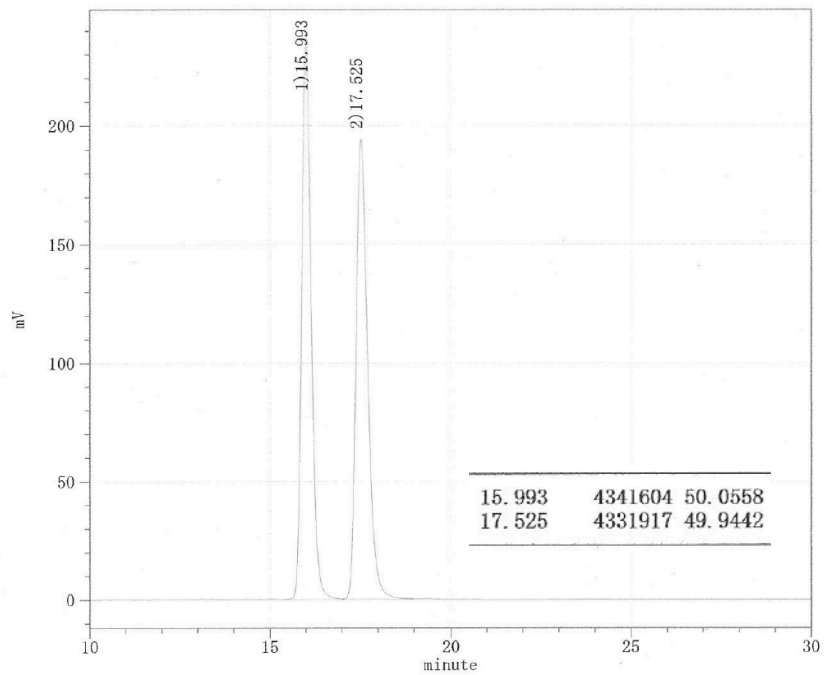

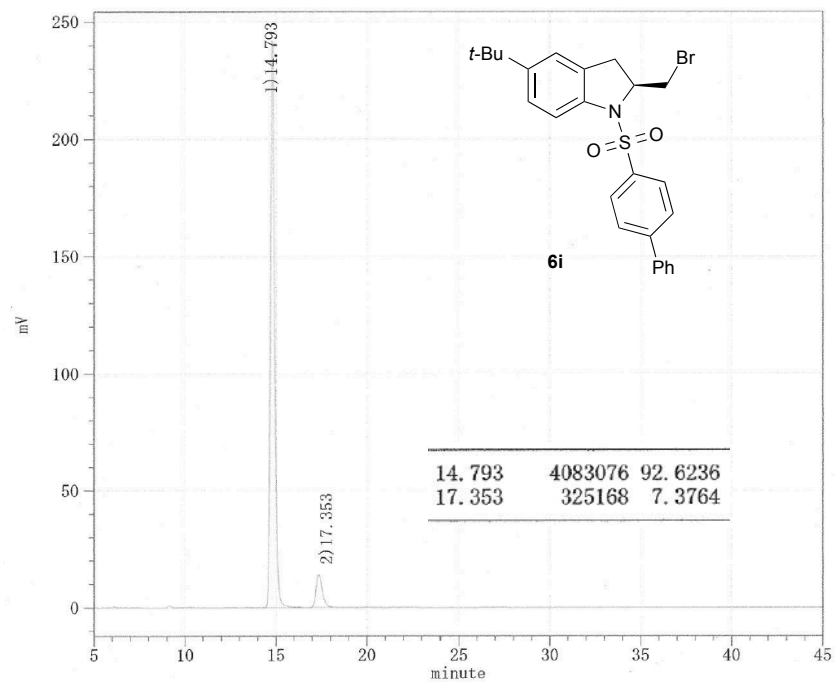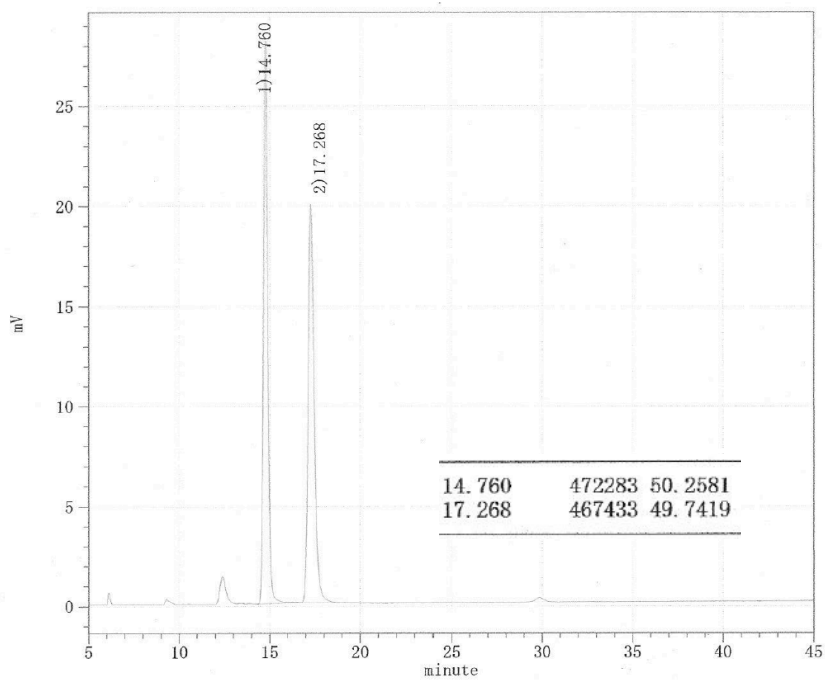

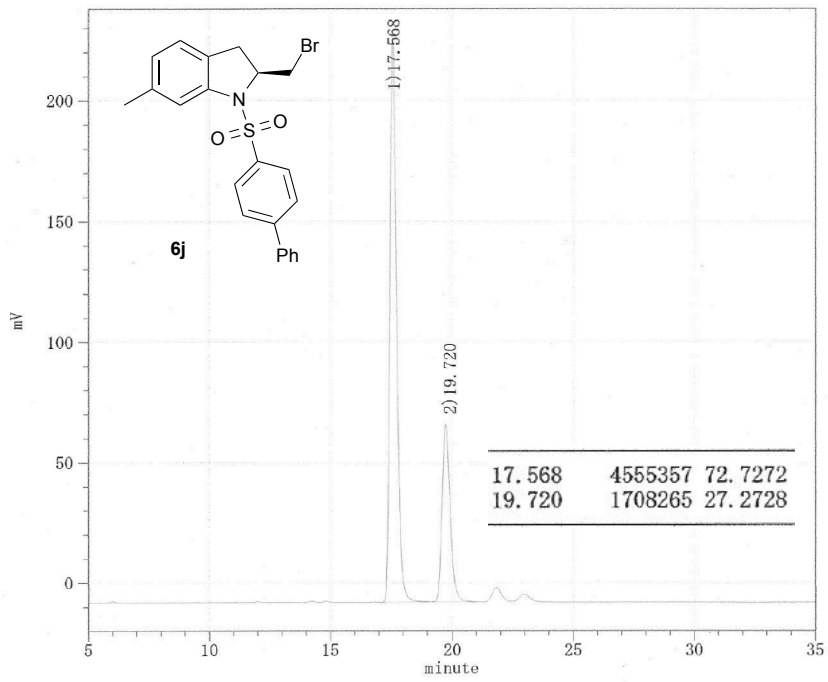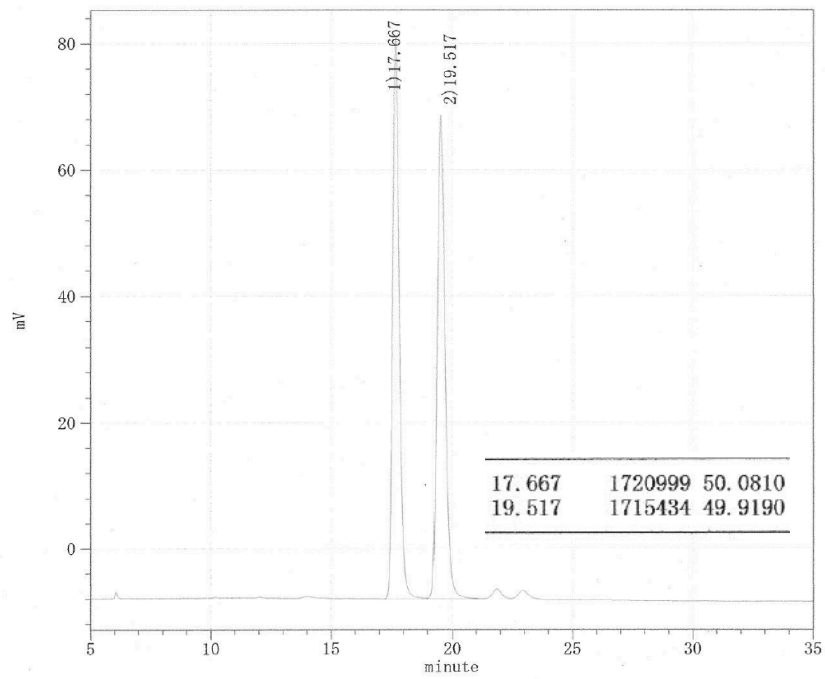

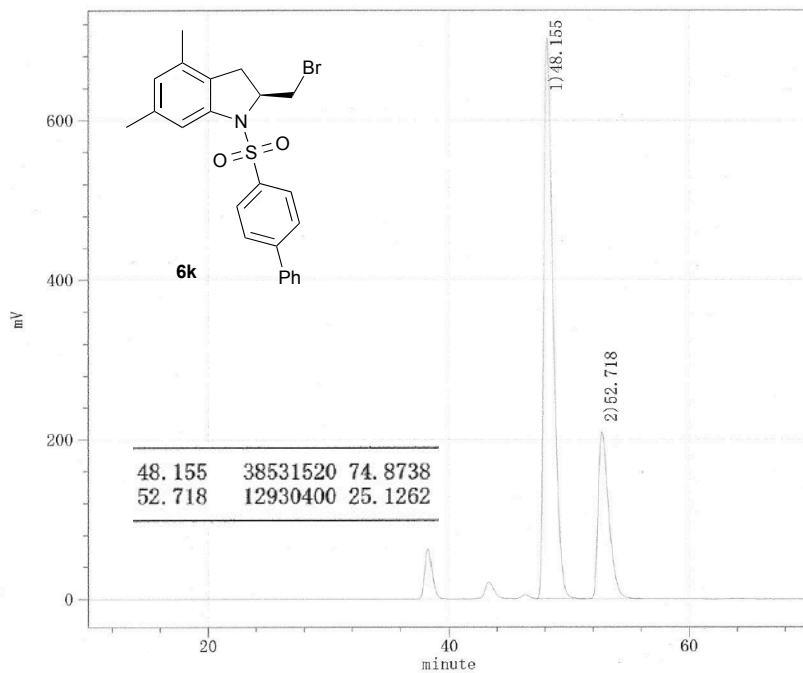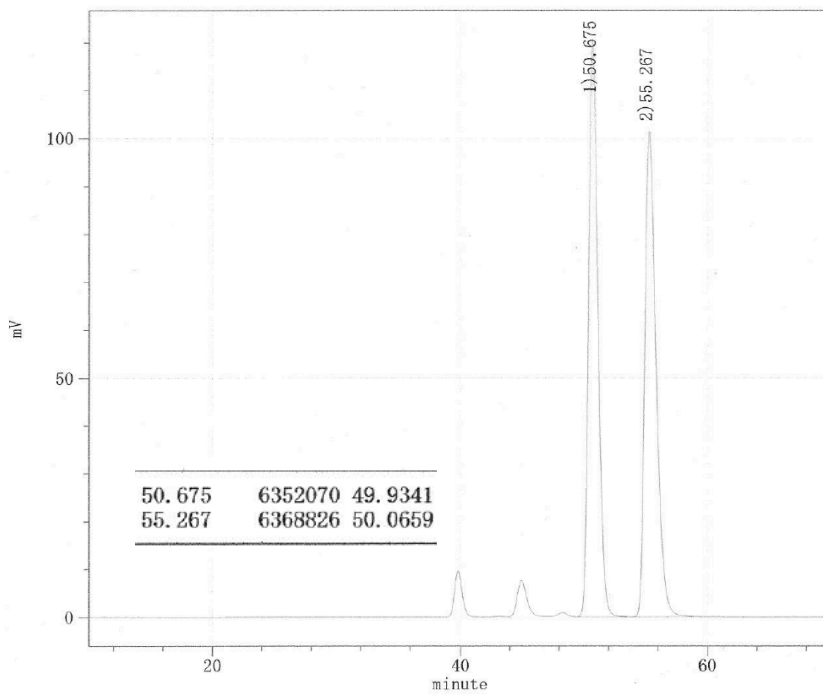

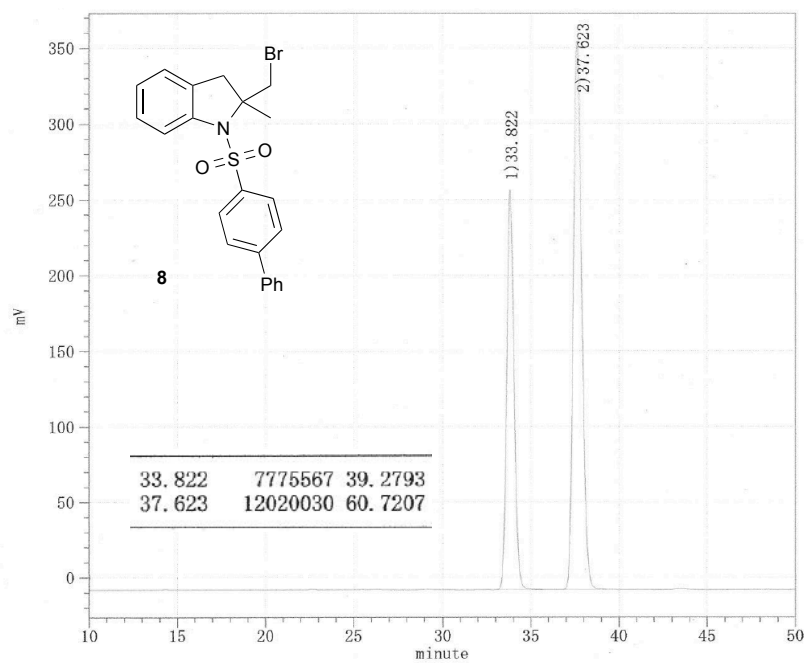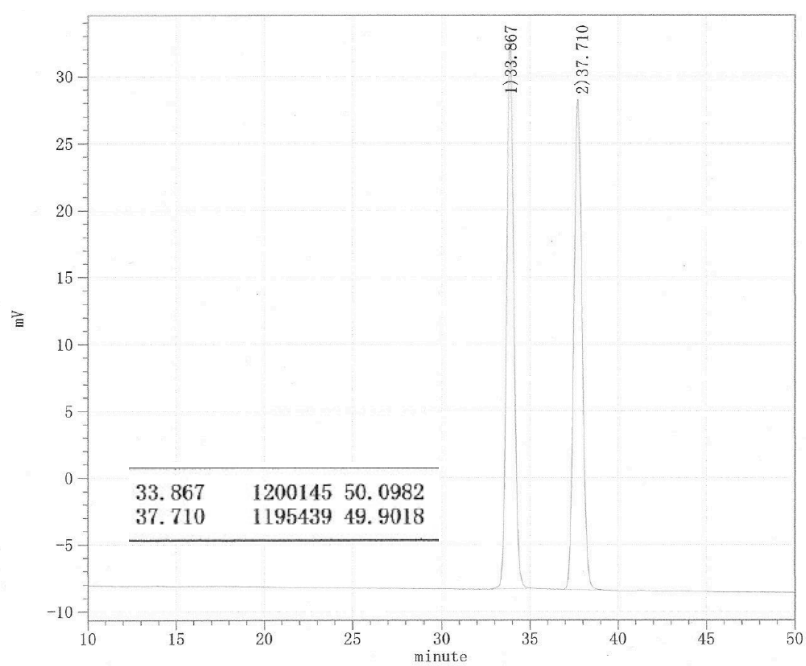



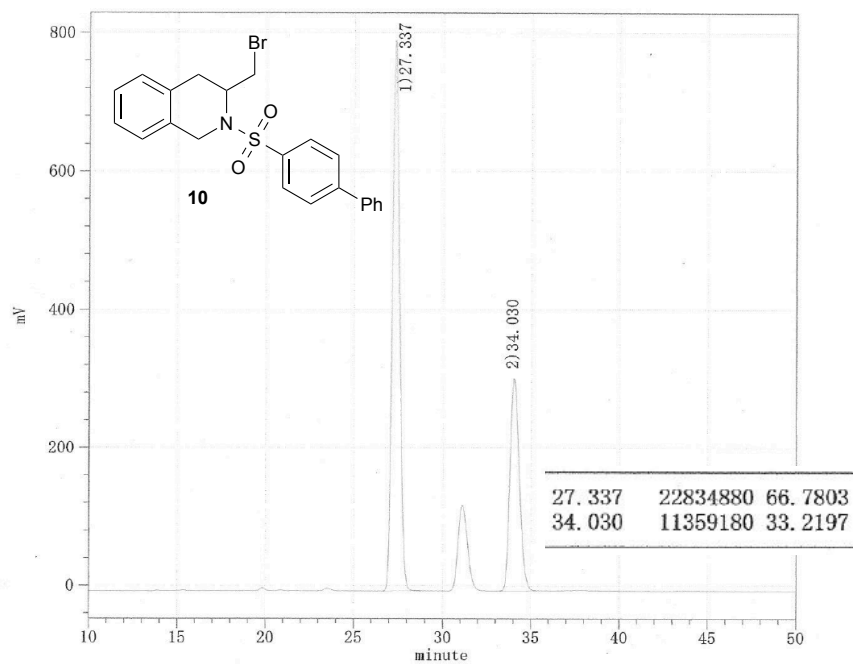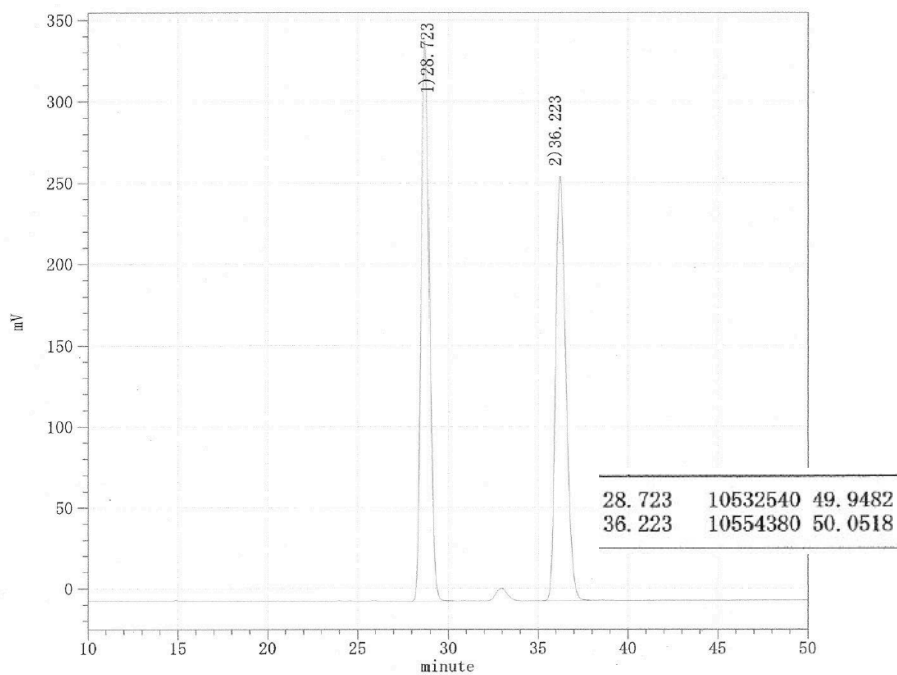

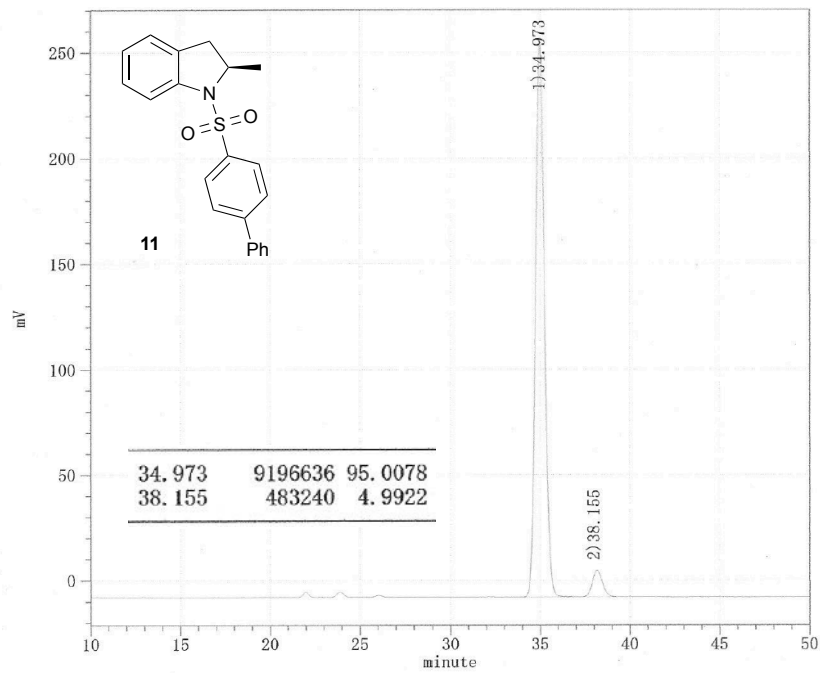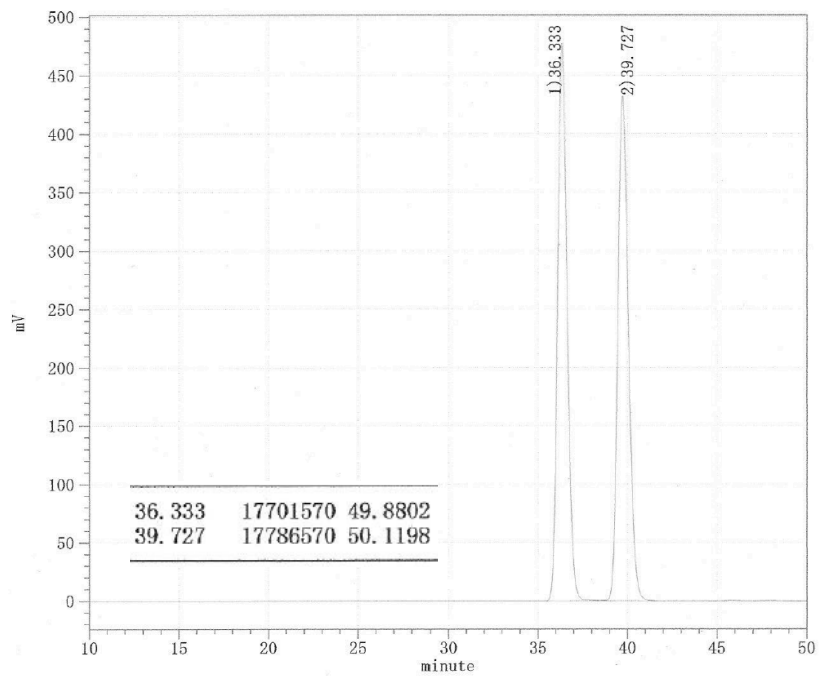

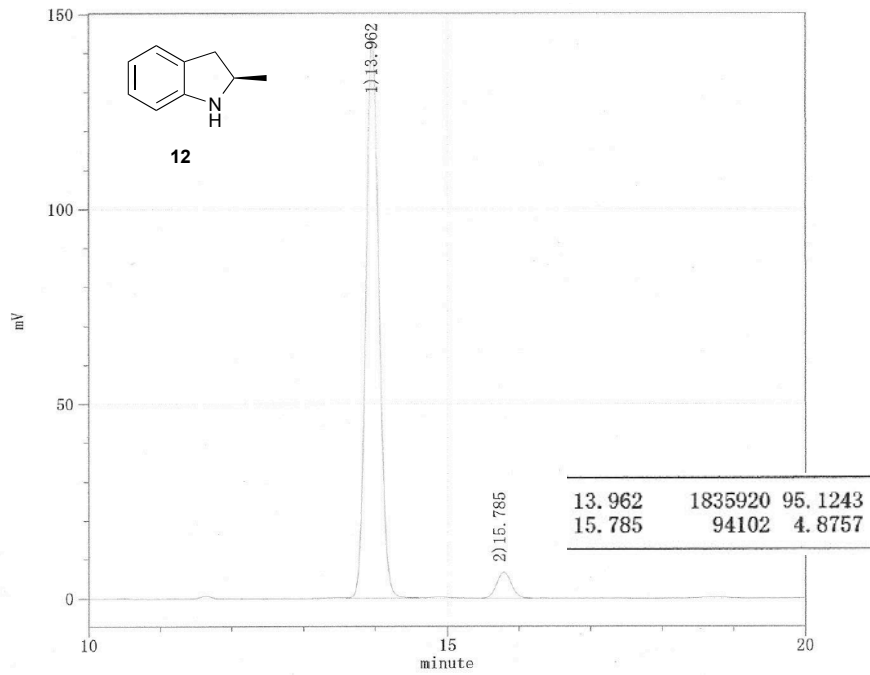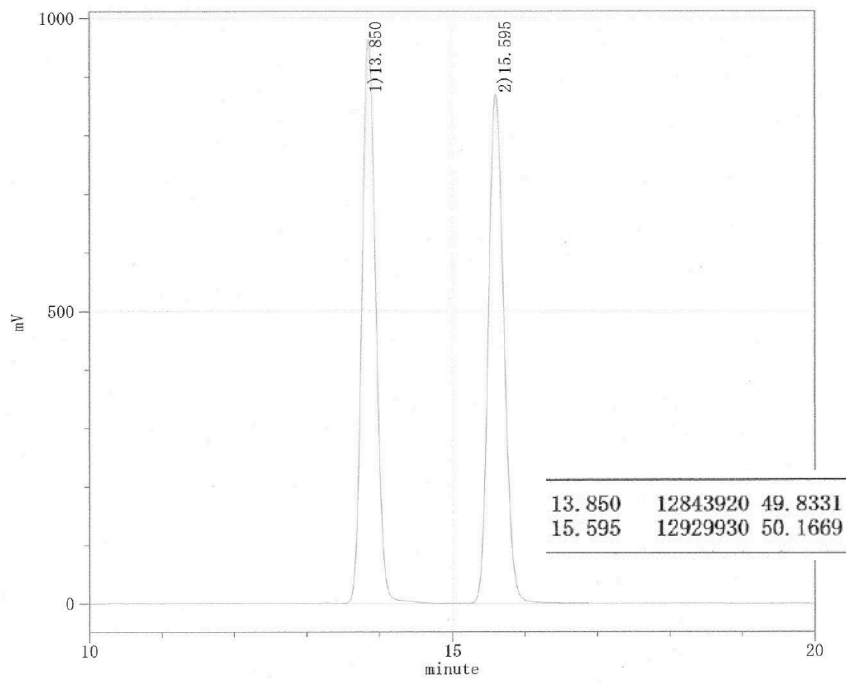

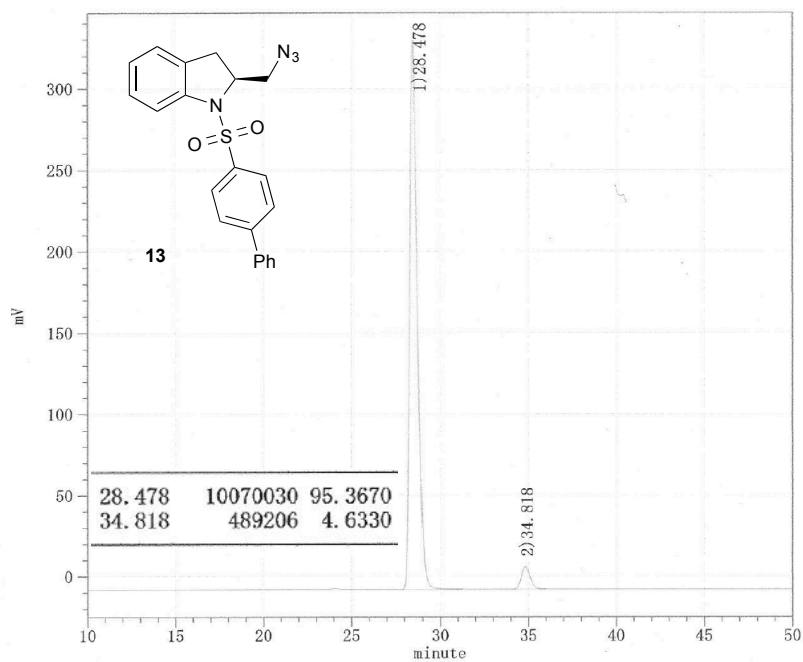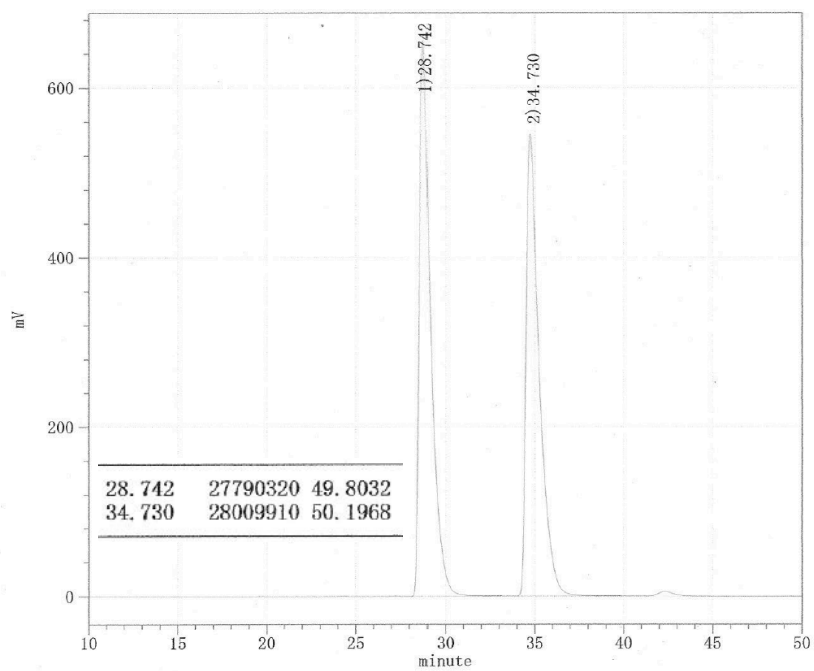

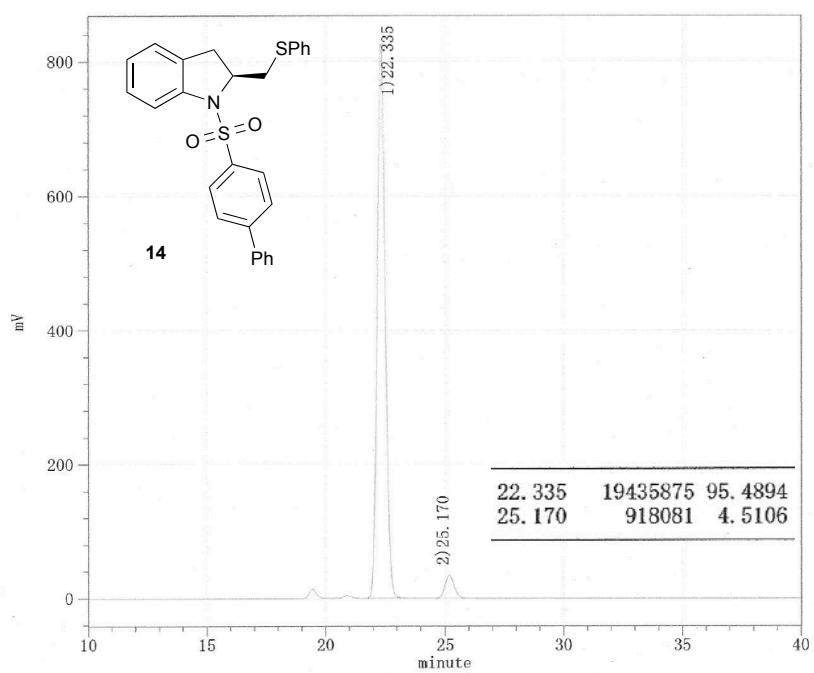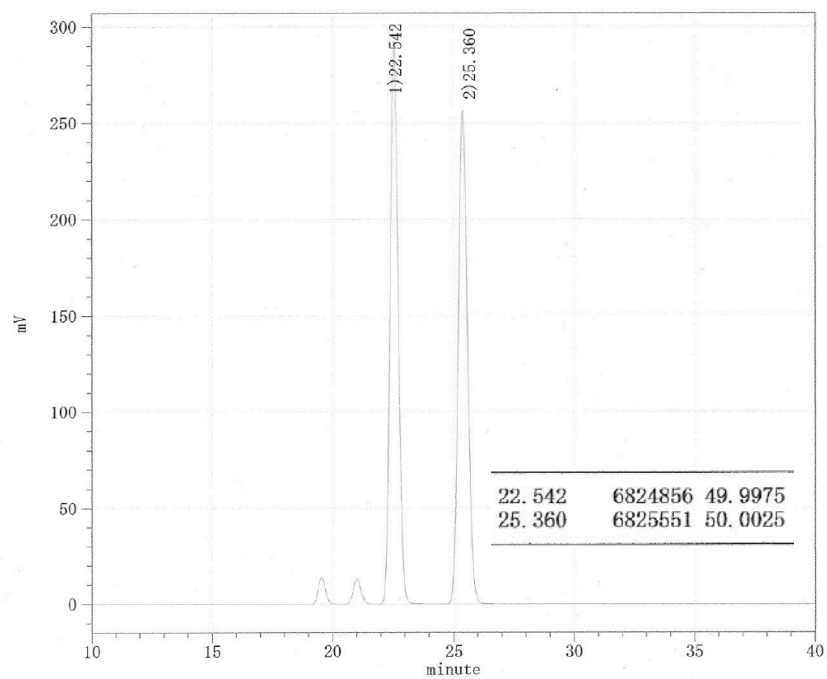

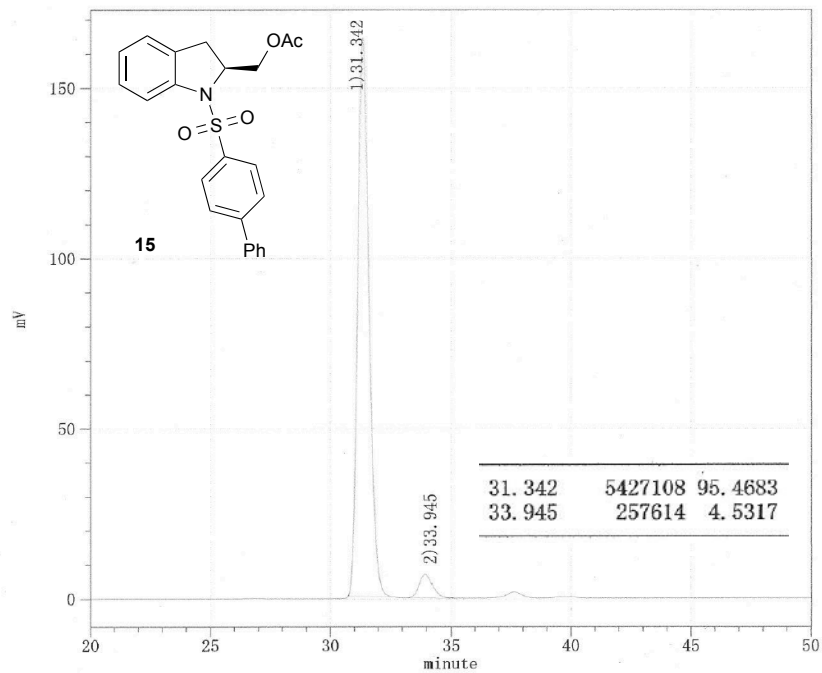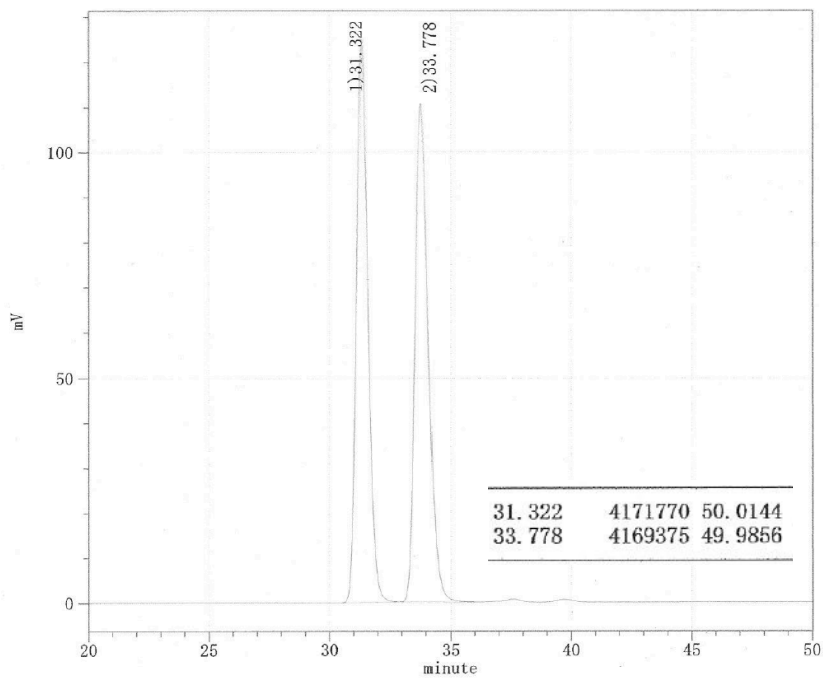

## Cartesian Coordinates

(S)-**1a**

SCF Done: E(RwB97XD) = -1820.55810244 A.U.

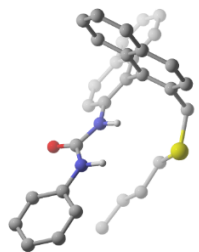

| Center Number | Atomic Number | Atomic Type | Coordinates (Angstroms) |           |           |
|---------------|---------------|-------------|-------------------------|-----------|-----------|
|               |               |             | X                       | Y         | Z         |
| 1             | 6             | 0           | -2.601570               | -3.442543 | -2.014884 |
| 2             | 6             | 0           | -2.371026               | -2.210715 | -1.455586 |
| 3             | 6             | 0           | -2.202298               | -2.066832 | -0.051268 |
| 4             | 6             | 0           | -2.282099               | -3.232193 | 0.761402  |
| 5             | 6             | 0           | -2.519402               | -4.493234 | 0.154259  |
| 6             | 6             | 0           | -2.673857               | -4.599256 | -1.204291 |
| 7             | 1             | 0           | -2.729504               | -3.532400 | -3.089597 |
| 8             | 1             | 0           | -2.318407               | -1.331317 | -2.089176 |
| 9             | 6             | 0           | -1.950366               | -0.793164 | 0.561298  |
| 10            | 6             | 0           | -2.126792               | -3.103418 | 2.166684  |
| 11            | 1             | 0           | -2.575340               | -5.374006 | 0.789054  |
| 12            | 1             | 0           | -2.852915               | -5.567518 | -1.662271 |
| 13            | 6             | 0           | -1.902457               | -1.879126 | 2.730103  |
| 14            | 6             | 0           | -1.807870               | -0.704417 | 1.934402  |
| 15            | 1             | 0           | -2.192305               | -3.993465 | 2.787175  |
| 16            | 1             | 0           | -1.789073               | -1.788529 | 3.807516  |
| 17            | 6             | 0           | -1.834398               | 0.408839  | -0.321533 |
| 18            | 6             | 0           | -2.991884               | 1.185373  | -0.630148 |
| 19            | 6             | 0           | -0.611541               | 0.740057  | -0.887343 |
| 20            | 6             | 0           | -4.267232               | 0.896440  | -0.069884 |
| 21            | 6             | 0           | -2.884082               | 2.282121  | -1.530228 |
| 22            | 6             | 0           | -0.507287               | 1.841993  | -1.779565 |
| 23            | 6             | 0           | -5.365029               | 1.654649  | -0.391565 |
| 24            | 1             | 0           | -4.366109               | 0.065226  | 0.621282  |
| 25            | 6             | 0           | -4.038050               | 3.045485  | -1.846271 |
| 26            | 6             | 0           | -1.615999               | 2.578722  | -2.091145 |
| 27            | 1             | 0           | 0.453677                | 2.077917  | -2.214671 |
| 28            | 6             | 0           | -5.254528               | 2.741472  | -1.290592 |
| 29            | 1             | 0           | -6.329790               | 1.419538  | 0.048747  |
| 30            | 1             | 0           | -3.937929               | 3.876791  | -2.539831 |
| 31            | 1             | 0           | -1.528868               | 3.415019  | -2.779894 |
| 32            | 1             | 0           | -6.133489               | 3.329891  | -1.536768 |
| 33            | 1             | 0           | 0.372804                | -0.569984 | 0.327959  |
| 34            | 6             | 0           | 1.761080                | -0.035590 | -1.083241 |
| 35            | 8             | 0           | 2.042590                | 0.520622  | -2.136170 |
| 36            | 1             | 0           | 2.329395                | -1.115360 | 0.562566  |
| 37            | 6             | 0           | 4.022368                | -0.978934 | -0.574460 |
| 38            | 6             | 0           | 4.756968                | -1.589730 | 0.451732  |
| 39            | 6             | 0           | 4.669161                | -0.632509 | -1.766555 |
| 40            | 6             | 0           | 6.111105                | -1.850138 | 0.289664  |
| 41            | 1             | 0           | 4.259910                | -1.856551 | 1.381412  |
| 42            | 6             | 0           | 6.029395                | -0.897633 | -1.911334 |
| 43            | 1             | 0           | 4.113615                | -0.159251 | -2.563730 |
| 44            | 6             | 0           | 6.759855                | -1.505588 | -0.894803 |
| 45            | 1             | 0           | 6.660129                | -2.324368 | 1.098120  |
| 46            | 1             | 0           | 6.518701                | -0.623551 | -2.841827 |
| 47            | 1             | 0           | 7.819032                | -1.707170 | -1.021987 |
| 48            | 6             | 0           | -1.514001               | 0.597767  | 2.633281  |
| 49            | 1             | 0           | -1.827956               | 1.458889  | 2.039514  |
| 50            | 1             | 0           | -2.047502               | 0.639880  | 3.586288  |
| 51            | 16            | 0           | 0.285946                | 0.789429  | 2.986874  |
| 52            | 6             | 0           | 0.695906                | 2.292567  | 2.026482  |
| 53            | 1             | 0           | 0.150356                | 2.253186  | 1.079695  |
| 54            | 1             | 0           | 0.358503                | 3.176886  | 2.576360  |
| 55            | 6             | 0           | 2.195770                | 2.358296  | 1.758185  |
| 56            | 1             | 0           | 2.747050                | 2.414700  | 2.706288  |
| 57            | 1             | 0           | 2.513162                | 1.433319  | 1.261526  |
| 58            | 6             | 0           | 2.564926                | 3.554519  | 0.878203  |
| 59            | 1             | 0           | 1.949963                | 3.534110  | -0.031394 |
| 60            | 1             | 0           | 2.316645                | 4.486237  | 1.403149  |
| 61            | 6             | 0           | 4.041528                | 3.554062  | 0.489827  |
| 62            | 1             | 0           | 4.291615                | 4.426865  | -0.123455 |
| 63            | 1             | 0           | 4.685267                | 3.572507  | 1.377564  |

|    |   |   |          |           |           |
|----|---|---|----------|-----------|-----------|
| 64 | 1 | 0 | 4.292963 | 2.655977  | -0.087022 |
| 65 | 7 | 0 | 2.655580 | -0.763070 | -0.328758 |
| 66 | 7 | 0 | 0.510533 | -0.007411 | -0.502413 |

NBS

SCF Done: E(RwB97XD) = -2934.29085487 A.U.

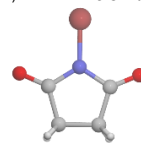

| Center Number | Atomic Number | Atomic Type | Coordinates (Angstroms) |           |           |
|---------------|---------------|-------------|-------------------------|-----------|-----------|
|               |               |             | X                       | Y         | Z         |
| 1             | 6             | 0           | -0.907983               | 1.181763  | -0.000021 |
| 2             | 6             | 0           | -0.907942               | -1.181726 | -0.000013 |
| 3             | 6             | 0           | -2.364694               | -0.766831 | 0.000024  |
| 4             | 6             | 0           | -2.364715               | 0.766819  | 0.000066  |
| 5             | 1             | 0           | -2.844609               | -1.196081 | 0.883176  |
| 6             | 1             | 0           | -2.844670               | -1.196048 | -0.883104 |
| 7             | 1             | 0           | -2.844594               | 1.196014  | 0.883265  |
| 8             | 1             | 0           | -2.844756               | 1.196101  | -0.883000 |
| 9             | 8             | 0           | -0.438555               | 2.291864  | -0.000114 |
| 10            | 8             | 0           | -0.438573               | -2.291871 | -0.000100 |
| 11            | 7             | 0           | -0.159327               | -0.000019 | 0.000050  |
| 12            | 35            | 0           | 1.679513                | 0.000001  | 0.000020  |

2g

SCF Done: E(RwB97XD) = -1415.11069861 A.U.

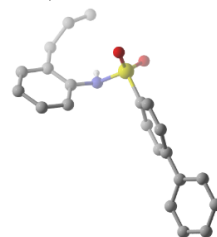

| Center Number | Atomic Number | Atomic Type | Coordinates (Angstroms) |           |           |
|---------------|---------------|-------------|-------------------------|-----------|-----------|
|               |               |             | X                       | Y         | Z         |
| 1             | 6             | 0           | 4.367559                | 2.500574  | 0.091346  |
| 2             | 6             | 0           | 3.981406                | 1.238277  | -0.364096 |
| 3             | 6             | 0           | 2.613168                | 0.919889  | -0.335330 |
| 4             | 6             | 0           | 1.676644                | 1.845042  | 0.127943  |
| 5             | 6             | 0           | 2.090828                | 3.085162  | 0.600401  |
| 6             | 6             | 0           | 3.441687                | 3.417648  | 0.579709  |
| 7             | 1             | 0           | 5.422790                | 2.761124  | 0.070484  |
| 8             | 1             | 0           | 0.620492                | 1.594726  | 0.109946  |
| 9             | 1             | 0           | 1.354402                | 3.793527  | 0.967546  |
| 10            | 1             | 0           | 3.775324                | 4.387064  | 0.937627  |
| 11            | 6             | 0           | 5.026046                | 0.252934  | -0.853355 |
| 12            | 1             | 0           | 4.796441                | -0.093269 | -1.870269 |
| 13            | 6             | 0           | 5.184099                | -0.934432 | 0.064215  |
| 14            | 1             | 0           | 5.383694                | -0.699024 | 1.109159  |
| 15            | 6             | 0           | 5.088032                | -2.205258 | -0.319036 |
| 16            | 1             | 0           | 4.879688                | -2.476046 | -1.353057 |
| 17            | 1             | 0           | 5.211731                | -3.022124 | 0.386858  |
| 18            | 1             | 0           | 5.983759                | 0.782645  | -0.920942 |
| 19            | 7             | 0           | 2.153575                | -0.342141 | -0.813059 |
| 20            | 1             | 0           | 2.816462                | -0.859353 | -1.383097 |
| 21            | 16            | 0           | 1.413343                | -1.430285 | 0.226630  |
| 22            | 8             | 0           | 1.852385                | -1.236900 | 1.601952  |
| 23            | 8             | 0           | 1.590249                | -2.724992 | -0.421944 |
| 24            | 6             | 0           | -0.301172               | -0.970035 | 0.139793  |
| 25            | 6             | 0           | -0.995862               | -0.698949 | 1.312798  |
| 26            | 6             | 0           | -0.931851               | -0.922933 | -1.102082 |
| 27            | 6             | 0           | -2.344726               | -0.369768 | 1.237397  |
| 28            | 1             | 0           | -0.486209               | -0.729282 | 2.269453  |
| 29            | 6             | 0           | -2.277546               | -0.593992 | -1.162816 |
| 30            | 1             | 0           | -0.379385               | -1.136611 | -2.011667 |
| 31            | 6             | 0           | -3.003683               | -0.313442 | 0.004279  |
| 32            | 1             | 0           | -2.883894               | -0.135277 | 2.150049  |
| 33            | 1             | 0           | -2.775509               | -0.571723 | -2.127150 |
| 34            | 6             | 0           | -4.444776               | 0.039796  | -0.069385 |
| 35            | 6             | 0           | -5.349800               | -0.456293 | 0.877154  |
| 36            | 6             | 0           | -4.924620               | 0.873509  | -1.087026 |
| 37            | 6             | 0           | -6.700274               | -0.128171 | 0.806729  |
| 38            | 1             | 0           | -4.998150               | -1.121887 | 1.660720  |

|    |   |   |           |           |           |
|----|---|---|-----------|-----------|-----------|
| 39 | 6 | 0 | -6.274584 | 1.204143  | -1.154510 |
| 40 | 1 | 0 | -4.233326 | 1.282696  | -1.818747 |
| 41 | 6 | 0 | -7.166876 | 0.703987  | -0.208588 |
| 42 | 1 | 0 | -7.390598 | -0.528241 | 1.543709  |
| 43 | 1 | 0 | -6.628537 | 1.859890  | -1.944725 |
| 44 | 1 | 0 | -8.220964 | 0.959732  | -0.263869 |

**CPs**

SCF Done: E(RwB97XD) = -6169.96830804 A.U.

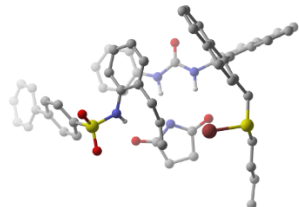

| Center Number | Atomic Number | Atomic Type | Coordinates (Angstroms) |           |           |
|---------------|---------------|-------------|-------------------------|-----------|-----------|
|               |               |             | X                       | Y         | Z         |
| 1             | 6             | 0           | -2.333088               | -4.523064 | 2.060651  |
| 2             | 6             | 0           | -2.794854               | -3.645685 | 1.112420  |
| 3             | 6             | 0           | -3.460443               | -2.449966 | 1.493861  |
| 4             | 6             | 0           | -3.628370               | -2.178249 | 2.880228  |
| 5             | 6             | 0           | -3.148932               | -3.110223 | 3.838006  |
| 6             | 6             | 0           | -2.517388               | -4.260193 | 3.438032  |
| 7             | 1             | 0           | -1.816439               | -5.426620 | 1.751239  |
| 8             | 1             | 0           | -2.625608               | -3.848768 | 0.060464  |
| 9             | 6             | 0           | -3.964746               | -1.518137 | 0.529681  |
| 10            | 6             | 0           | -4.283735               | -0.984014 | 3.276802  |
| 11            | 1             | 0           | -3.290506               | -2.893159 | 4.893576  |
| 12            | 1             | 0           | -2.151720               | -4.968589 | 4.175514  |
| 13            | 6             | 0           | -4.722385               | -0.088758 | 2.342650  |
| 14            | 6             | 0           | -4.544515               | -0.339152 | 0.956658  |
| 15            | 1             | 0           | -4.433403               | -0.788898 | 4.335018  |
| 16            | 1             | 0           | -5.228234               | 0.813935  | 2.677039  |
| 17            | 6             | 0           | -4.007762               | -1.901329 | -0.914274 |
| 18            | 6             | 0           | -5.247571               | -2.392277 | -1.452260 |
| 19            | 6             | 0           | -2.898069               | -1.825907 | -1.724931 |
| 20            | 6             | 0           | -6.425695               | -2.518142 | -0.665738 |
| 21            | 6             | 0           | -5.306962               | -2.785446 | -2.818484 |
| 22            | 6             | 0           | -2.970129               | -2.221598 | -3.087722 |
| 23            | 6             | 0           | -7.592674               | -2.994598 | -1.210567 |
| 24            | 1             | 0           | -6.398524               | -2.243965 | 0.383900  |
| 25            | 6             | 0           | -6.527597               | -3.271910 | -3.354072 |
| 26            | 6             | 0           | -4.136744               | -2.689416 | -3.618315 |
| 27            | 1             | 0           | -2.077189               | -2.141649 | -3.698265 |
| 28            | 6             | 0           | -7.649436               | -3.372361 | -2.570991 |
| 29            | 1             | 0           | -8.479467               | -3.085849 | -0.590065 |
| 30            | 1             | 0           | -6.555142               | -3.565275 | -4.400470 |
| 31            | 1             | 0           | -4.187198               | -2.986265 | -4.662502 |
| 32            | 1             | 0           | -8.578264               | -3.748082 | -2.989805 |
| 33            | 1             | 0           | -1.641958               | -0.271329 | -1.242187 |
| 34            | 6             | 0           | -0.524038               | -2.032036 | -1.387461 |
| 35            | 8             | 0           | -0.560173               | -3.243497 | -1.593900 |
| 36            | 1             | 0           | 0.500315                | -0.267216 | -1.211041 |
| 37            | 6             | 0           | 1.933920                | -1.729039 | -1.502633 |
| 38            | 6             | 0           | 2.925383                | -0.743498 | -1.620414 |
| 39            | 6             | 0           | 2.306089                | -3.078221 | -1.579222 |
| 40            | 6             | 0           | 4.253850                | -1.100015 | -1.812707 |
| 41            | 1             | 0           | 2.656507                | 0.306212  | -1.531304 |
| 42            | 6             | 0           | 3.643848                | -3.418111 | -1.768083 |
| 43            | 1             | 0           | 1.550808                | -3.844855 | -1.481552 |
| 44            | 6             | 0           | 4.627938                | -2.440710 | -1.887946 |
| 45            | 1             | 0           | 5.003448                | -0.319677 | -1.899331 |
| 46            | 1             | 0           | 3.912603                | -4.470117 | -1.821532 |
| 47            | 1             | 0           | 5.668108                | -2.713735 | -2.040993 |
| 48            | 6             | 0           | -5.043062               | 0.632094  | -0.084889 |
| 49            | 1             | 0           | -4.477292               | 0.548796  | -1.015060 |
| 50            | 1             | 0           | -6.111391               | 0.507218  | -0.301592 |
| 51            | 16            | 0           | -4.927671               | 2.388001  | 0.432019  |
| 52            | 6             | 0           | -4.774112               | 3.210563  | -1.192070 |
| 53            | 1             | 0           | -3.932185               | 2.726083  | -1.702415 |
| 54            | 1             | 0           | -5.712508               | 2.966514  | -1.703567 |
| 55            | 6             | 0           | -4.585111               | 4.712879  | -1.031993 |
| 56            | 1             | 0           | -5.443469               | 5.154118  | -0.512101 |
| 57            | 1             | 0           | -3.695680               | 4.909515  | -0.420761 |
| 58            | 6             | 0           | -4.411493               | 5.371468  | -2.403112 |
| 59            | 1             | 0           | -3.595662               | 4.873515  | -2.941350 |
| 60            | 1             | 0           | -5.322223               | 5.218646  | -2.994870 |
| 61            | 6             | 0           | -4.111521               | 6.862742  | -2.282096 |

|     |    |   |           |           |           |
|-----|----|---|-----------|-----------|-----------|
| 62  | 1  | 0 | -4.001452 | 7.322029  | -3.270024 |
| 63  | 1  | 0 | -4.916768 | 7.387471  | -1.754918 |
| 64  | 1  | 0 | -3.180395 | 7.036680  | -1.728304 |
| 65  | 7  | 0 | 0.622135  | -1.286861 | -1.284319 |
| 66  | 7  | 0 | -1.681271 | -1.295366 | -1.218125 |
| 67  | 6  | 0 | 1.041837  | 2.596904  | -1.195630 |
| 68  | 6  | 0 | -1.066038 | 2.156468  | -1.714242 |
| 69  | 6  | 0 | -0.945152 | 3.651159  | -1.999417 |
| 70  | 6  | 0 | 0.523585  | 3.940218  | -1.706170 |
| 71  | 1  | 0 | -1.629784 | 4.195672  | -1.340440 |
| 72  | 1  | 0 | -1.246062 | 3.856962  | -3.030688 |
| 73  | 1  | 0 | 0.684957  | 4.708639  | -0.945109 |
| 74  | 1  | 0 | 1.093694  | 4.230882  | -2.593994 |
| 75  | 8  | 0 | 2.181865  | 2.435637  | -0.746691 |
| 76  | 8  | 0 | -2.121623 | 1.518746  | -1.842563 |
| 77  | 7  | 0 | 0.097830  | 1.621155  | -1.277388 |
| 78  | 6  | 0 | 0.214061  | -1.781455 | 2.839818  |
| 79  | 6  | 0 | 0.717966  | -0.501716 | 2.603916  |
| 80  | 6  | 0 | 1.979657  | -0.390053 | 1.997579  |
| 81  | 6  | 0 | 2.713649  | -1.528416 | 1.669517  |
| 82  | 6  | 0 | 2.206566  | -2.794030 | 1.941208  |
| 83  | 6  | 0 | 0.948124  | -2.919454 | 2.519351  |
| 84  | 1  | 0 | -0.771491 | -1.889190 | 3.283955  |
| 85  | 1  | 0 | 3.674873  | -1.418222 | 1.178570  |
| 86  | 1  | 0 | 2.782814  | -3.674783 | 1.675360  |
| 87  | 1  | 0 | 0.527644  | -3.901607 | 2.713482  |
| 88  | 6  | 0 | -0.089882 | 0.715331  | 3.007525  |
| 89  | 1  | 0 | -1.110426 | 0.382062  | 3.238839  |
| 90  | 6  | 0 | -0.161924 | 1.765491  | 1.936841  |
| 91  | 1  | 0 | -0.159965 | 1.392447  | 0.914149  |
| 92  | 6  | 0 | -0.226086 | 3.089981  | 2.143591  |
| 93  | 1  | 0 | -0.207026 | 3.518767  | 3.143399  |
| 94  | 1  | 0 | -0.221440 | 3.788333  | 1.309501  |
| 95  | 1  | 0 | 0.316417  | 1.152289  | 3.928192  |
| 96  | 7  | 0 | 2.482724  | 0.915616  | 1.697252  |
| 97  | 1  | 0 | 2.310286  | 1.326674  | 0.767105  |
| 98  | 16 | 0 | 3.787271  | 1.566679  | 2.451750  |
| 99  | 8  | 0 | 3.900751  | 0.937332  | 3.761878  |
| 100 | 8  | 0 | 3.661274  | 3.014668  | 2.342061  |
| 101 | 6  | 0 | 5.208297  | 1.100210  | 1.482011  |
| 102 | 6  | 0 | 5.971599  | -0.001202 | 1.855666  |
| 103 | 6  | 0 | 5.488152  | 1.806800  | 0.314655  |
| 104 | 6  | 0 | 7.019659  | -0.407811 | 1.038953  |
| 105 | 1  | 0 | 5.749441  | -0.532535 | 2.775115  |
| 106 | 6  | 0 | 6.543248  | 1.394918  | -0.488298 |
| 107 | 1  | 0 | 4.873915  | 2.653113  | 0.024957  |
| 108 | 6  | 0 | 7.314539  | 0.275703  | -0.146736 |
| 109 | 1  | 0 | 7.622965  | -1.260567 | 1.335063  |
| 110 | 1  | 0 | 6.744274  | 1.926698  | -1.413591 |
| 111 | 6  | 0 | 8.399883  | -0.197134 | -1.043825 |
| 112 | 6  | 0 | 8.598758  | -1.568211 | -1.250659 |
| 113 | 6  | 0 | 9.230868  | 0.710556  | -1.711777 |
| 114 | 6  | 0 | 9.598923  | -2.019215 | -2.106553 |
| 115 | 1  | 0 | 7.951353  | -2.286103 | -0.754402 |
| 116 | 6  | 0 | 10.232574 | 0.258793  | -2.565606 |
| 117 | 1  | 0 | 9.103394  | 1.777361  | -1.549577 |
| 118 | 6  | 0 | 10.419377 | -1.107152 | -2.766785 |
| 119 | 1  | 0 | 9.733270  | -3.085655 | -2.262554 |
| 120 | 1  | 0 | 10.872002 | 0.976495  | -3.071493 |
| 121 | 1  | 0 | 11.198903 | -1.458681 | -3.436357 |
| 122 | 35 | 0 | -2.857441 | 2.532407  | 1.232445  |

**CPr**

SCF Done: E(RwB97XD) = -6169.97418713 A.U.

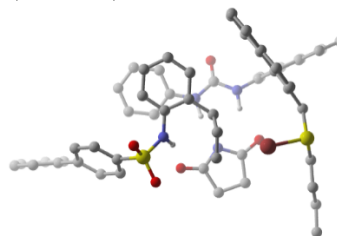

| Center Number | Atomic Number | Atomic Type | Coordinates (Angstroms) |           |           |
|---------------|---------------|-------------|-------------------------|-----------|-----------|
|               |               |             | X                       | Y         | Z         |
| 1             | 6             | 0           | 2.529935                | -4.746880 | -1.494025 |
| 2             | 6             | 0           | 2.988066                | -3.751863 | -0.667522 |
| 3             | 6             | 0           | 3.534788                | -2.555736 | -1.205886 |
| 4             | 6             | 0           | 3.596551                | -2.415047 | -2.620648 |
| 5             | 6             | 0           | 3.126281                | -3.467179 | -3.449795 |
| 6             | 6             | 0           | 2.605306                | -4.610183 | -2.899621 |



|    |    |   |           |           |           |
|----|----|---|-----------|-----------|-----------|
| 7  | 1  | 0 | 2.099750  | -5.646354 | -1.064087 |
| 8  | 1  | 0 | 2.899391  | -3.861845 | 0.407274  |
| 9  | 6  | 0 | 4.012745  | -1.491802 | -0.372466 |
| 10 | 6  | 0 | 4.139236  | -1.227719 | -3.174522 |
| 11 | 1  | 0 | 3.183011  | -3.344881 | -4.528135 |
| 12 | 1  | 0 | 2.243271  | -5.409067 | -3.540076 |
| 13 | 6  | 0 | 4.568638  | -0.215629 | -2.363999 |
| 14 | 6  | 0 | 4.480084  | -0.326999 | -0.951379 |
| 15 | 1  | 0 | 4.212278  | -1.132256 | -4.254157 |
| 16 | 1  | 0 | 4.992977  | 0.674728  | -2.820577 |
| 17 | 6  | 0 | 4.129041  | -1.707161 | 1.102336  |
| 18 | 6  | 0 | 5.415912  | -2.023029 | 1.657122  |
| 19 | 6  | 0 | 3.032169  | -1.635012 | 1.932178  |
| 20 | 6  | 0 | 6.589673  | -2.120025 | 0.859801  |
| 21 | 6  | 0 | 5.532456  | -2.256310 | 3.056357  |
| 22 | 6  | 0 | 3.156240  | -1.888660 | 3.323216  |
| 23 | 6  | 0 | 7.807222  | -2.406948 | 1.425698  |
| 24 | 1  | 0 | 6.518668  | -1.970620 | -0.212707 |
| 25 | 6  | 0 | 6.804568  | -2.550422 | 3.612468  |
| 26 | 6  | 0 | 4.369603  | -2.191968 | 3.869755  |
| 27 | 1  | 0 | 2.268075  | -1.826494 | 3.943171  |
| 28 | 6  | 0 | 7.920899  | -2.619246 | 2.818312  |
| 29 | 1  | 0 | 8.690766  | -2.475808 | 0.797711  |
| 30 | 1  | 0 | 6.876635  | -2.721843 | 4.683445  |
| 31 | 1  | 0 | 4.463052  | -2.376315 | 4.936536  |
| 32 | 1  | 0 | 8.890119  | -2.842342 | 3.254246  |
| 33 | 1  | 0 | 1.671368  | -0.227124 | 1.296165  |
| 34 | 6  | 0 | 0.672422  | -2.045522 | 1.575337  |
| 35 | 8  | 0 | 0.779966  | -3.239979 | 1.843789  |
| 36 | 1  | 0 | -0.458258 | -0.359674 | 1.337072  |
| 37 | 6  | 0 | -1.791877 | -1.955640 | 1.308926  |
| 38 | 6  | 0 | -2.892536 | -1.091325 | 1.400723  |
| 39 | 6  | 0 | -2.015074 | -3.322400 | 1.098021  |
| 40 | 6  | 0 | -4.185421 | -1.584234 | 1.273545  |
| 41 | 1  | 0 | -2.726534 | -0.025766 | 1.539724  |
| 42 | 6  | 0 | -3.317390 | -3.800705 | 0.980869  |
| 43 | 1  | 0 | -1.173364 | -3.996347 | 1.019920  |
| 44 | 6  | 0 | -4.411059 | -2.943095 | 1.064603  |
| 45 | 1  | 0 | -5.021715 | -0.893994 | 1.332458  |
| 46 | 1  | 0 | -3.471909 | -4.863014 | 0.811025  |
| 47 | 1  | 0 | -5.422995 | -3.324875 | 0.964747  |
| 48 | 6  | 0 | 4.937727  | 0.786359  | -0.039401 |
| 49 | 1  | 0 | 4.366949  | 0.798924  | 0.891497  |
| 50 | 1  | 0 | 6.010071  | 0.730648  | 0.188144  |
| 51 | 16 | 0 | 4.760907  | 2.459237  | -0.767747 |
| 52 | 6  | 0 | 4.672232  | 3.484697  | 0.738379  |
| 53 | 1  | 0 | 3.893407  | 3.037866  | 1.367556  |
| 54 | 1  | 0 | 5.654815  | 3.341180  | 1.203938  |
| 55 | 6  | 0 | 4.410053  | 4.945685  | 0.399945  |
| 56 | 1  | 0 | 5.198859  | 5.334181  | -0.255148 |
| 57 | 1  | 0 | 3.461226  | 5.036761  | -0.142843 |
| 58 | 6  | 0 | 4.343338  | 5.777819  | 1.683408  |
| 59 | 1  | 0 | 3.584933  | 5.351277  | 2.351615  |
| 60 | 1  | 0 | 5.303592  | 5.707297  | 2.208811  |
| 61 | 6  | 0 | 4.013402  | 7.240120  | 1.397885  |
| 62 | 1  | 0 | 3.975769  | 7.819670  | 2.326081  |
| 63 | 1  | 0 | 4.767401  | 7.696002  | 0.745823  |
| 64 | 1  | 0 | 3.039834  | 7.334221  | 0.902876  |
| 65 | 7  | 0 | -0.514538 | -1.384299 | 1.387749  |
| 66 | 7  | 0 | 1.776620  | -1.237846 | 1.405263  |
| 67 | 6  | 0 | -1.009849 | 2.446326  | 1.213663  |
| 68 | 6  | 0 | 1.161511  | 2.207168  | 1.552582  |
| 69 | 6  | 0 | 0.959464  | 3.716913  | 1.654024  |
| 70 | 6  | 0 | -0.553168 | 3.869203  | 1.526913  |
| 71 | 1  | 0 | 1.501586  | 4.198123  | 0.832745  |
| 72 | 1  | 0 | 1.378497  | 4.091307  | 2.592037  |
| 73 | 1  | 0 | -0.873320 | 4.545830  | 0.730188  |
| 74 | 1  | 0 | -1.031161 | 4.201175  | 2.454106  |
| 75 | 8  | 0 | -2.169079 | 2.154619  | 0.899277  |
| 76 | 8  | 0 | 2.265799  | 1.654216  | 1.657545  |
| 77 | 7  | 0 | 0.005386  | 1.549405  | 1.304948  |
| 78 | 6  | 0 | -0.278343 | -2.268396 | -2.307398 |
| 79 | 6  | 0 | -0.696138 | -0.978941 | -1.976774 |
| 80 | 6  | 0 | -2.074519 | -0.730085 | -1.879116 |
| 81 | 6  | 0 | -2.992034 | -1.752111 | -2.124075 |
| 82 | 6  | 0 | -2.553896 | -3.020174 | -2.486195 |
| 83 | 6  | 0 | -1.190580 | -3.284445 | -2.569856 |
| 84 | 1  | 0 | 0.786833  | -2.472822 | -2.361441 |
| 85 | 1  | 0 | -4.052468 | -1.561527 | -2.006992 |
| 86 | 1  | 0 | -3.281411 | -3.805235 | -2.669717 |
| 87 | 1  | 0 | -0.834930 | -4.277645 | -2.828472 |
| 88 | 6  | 0 | 0.326378  | 0.102205  | -1.703505 |
| 89 | 1  | 0 | 0.150526  | 0.558631  | -0.724212 |
| 90 | 6  | 0 | 0.349547  | 1.178595  | -2.756153 |
| 91 | 1  | 0 | 0.702587  | 0.879047  | -3.743158 |
| 92 | 6  | 0 | -0.032953 | 2.448080  | -2.553982 |
| 93 | 1  | 0 | -0.448937 | 2.771102  | -1.602758 |

|     |    |   |            |           |           |
|-----|----|---|------------|-----------|-----------|
| 94  | 1  | 0 | -0.004604  | 3.183549  | -3.353691 |
| 95  | 1  | 0 | 1.316528   | -0.367599 | -1.656028 |
| 96  | 7  | 0 | -2.501453  | 0.570004  | -1.497889 |
| 97  | 1  | 0 | -2.190755  | 0.986095  | -0.610673 |
| 98  | 16 | 0 | -3.731014  | 1.407323  | -2.192571 |
| 99  | 8  | 0 | -3.950943  | 0.861462  | -3.525585 |
| 100 | 8  | 0 | -3.429054  | 2.821955  | -2.020999 |
| 101 | 6  | 0 | -5.178761  | 1.069713  | -1.207266 |
| 102 | 6  | 0 | -6.143240  | 0.185073  | -1.675975 |
| 103 | 6  | 0 | -5.306340  | 1.680856  | 0.038778  |
| 104 | 6  | 0 | -7.245458  | -0.102901 | -0.879831 |
| 105 | 1  | 0 | -6.031481  | -0.279357 | -2.650224 |
| 106 | 6  | 0 | -6.417151  | 1.391311  | 0.820081  |
| 107 | 1  | 0 | -4.540435  | 2.362394  | 0.395746  |
| 108 | 6  | 0 | -7.399095  | 0.493307  | 0.377273  |
| 109 | 1  | 0 | -7.984860  | -0.813819 | -1.235709 |
| 110 | 1  | 0 | -6.528644  | 1.879062  | 1.783875  |
| 111 | 6  | 0 | -8.572225  | 0.167847  | 1.229258  |
| 112 | 6  | 0 | -9.843290  | 0.007014  | 0.664157  |
| 113 | 6  | 0 | -8.426353  | 0.003650  | 2.612405  |
| 114 | 6  | 0 | -10.939496 | -0.310660 | 1.460309  |
| 115 | 1  | 0 | -9.979844  | 0.151341  | -0.404017 |
| 116 | 6  | 0 | -9.522766  | -0.315473 | 3.408024  |
| 117 | 1  | 0 | -7.444618  | 0.104434  | 3.067039  |
| 118 | 6  | 0 | -10.782684 | -0.474094 | 2.834916  |
| 119 | 1  | 0 | -11.918754 | -0.425505 | 1.004726  |
| 120 | 1  | 0 | -9.389106  | -0.448761 | 4.477585  |
| 121 | 1  | 0 | -11.637803 | -0.724323 | 3.456128  |
| 122 | 35 | 0 | 2.687099   | 2.435797  | -1.542231 |

TS1s

SCF Done: E(RwB97XD) = -6169.96073368 A.U.

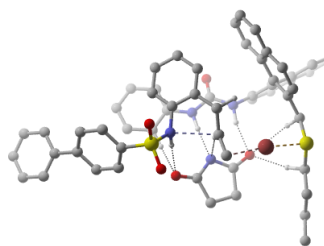

| Center Number | Atomic Number | Atomic Type | Coordinates (Angstroms) |           |           |
|---------------|---------------|-------------|-------------------------|-----------|-----------|
|               |               |             | X                       | Y         | Z         |
| 1             | 6             | 0           | -2.440474               | -4.643155 | 1.856749  |
| 2             | 6             | 0           | -2.881338               | -3.693330 | 0.969800  |
| 3             | 6             | 0           | -3.438534               | -2.470829 | 1.433049  |
| 4             | 6             | 0           | -3.511374               | -2.246469 | 2.836165  |
| 5             | 6             | 0           | -3.060179               | -3.253945 | 3.729663  |
| 6             | 6             | 0           | -2.540769               | -4.430048 | 3.251481  |
| 7             | 1             | 0           | -2.007405               | -5.566564 | 1.483929  |
| 8             | 1             | 0           | -2.776476               | -3.859512 | -0.096889 |
| 9             | 6             | 0           | -3.933735               | -1.470517 | 0.535793  |
| 10            | 6             | 0           | -4.045111               | -1.021176 | 3.311403  |
| 11            | 1             | 0           | -3.132333               | -3.072882 | 4.798978  |
| 12            | 1             | 0           | -2.196389               | -5.195468 | 3.940633  |
| 13            | 6             | 0           | -4.474420               | -0.063113 | 2.435687  |
| 14            | 6             | 0           | -4.410787               | -0.273055 | 1.033570  |
| 15            | 1             | 0           | -4.113756               | -0.853974 | 4.382855  |
| 16            | 1             | 0           | -4.884840               | 0.861810  | 2.832028  |
| 17            | 6             | 0           | -4.077401               | -1.795810 | -0.915800 |
| 18            | 6             | 0           | -5.355942               | -2.250451 | -1.388332 |
| 19            | 6             | 0           | -3.024573               | -1.699175 | -1.796484 |
| 20            | 6             | 0           | -6.478646               | -2.393556 | -0.527470 |
| 21            | 6             | 0           | -5.513011               | -2.590019 | -2.761203 |
| 22            | 6             | 0           | -3.193290               | -2.037776 | -3.165591 |
| 23            | 6             | 0           | -7.685567               | -2.838094 | -1.008008 |
| 24            | 1             | 0           | -6.375701               | -2.155498 | 0.526297  |
| 25            | 6             | 0           | -6.773700               | -3.043872 | -3.229387 |
| 26            | 6             | 0           | -4.399069               | -2.471779 | -3.634975 |
| 27            | 1             | 0           | -2.342440               | -1.941419 | -3.831972 |
| 28            | 6             | 0           | -7.839473               | -3.164684 | -2.374272 |
| 29            | 1             | 0           | -8.528487               | -2.943038 | -0.331136 |
| 30            | 1             | 0           | -6.877500               | -3.295767 | -4.281730 |
| 31            | 1             | 0           | -4.523516               | -2.725741 | -4.684324 |
| 32            | 1             | 0           | -8.799446               | -3.515303 | -2.741747 |
| 33            | 1             | 0           | -1.694473               | -0.181618 | -1.391521 |
| 34            | 6             | 0           | -0.643444               | -1.978193 | -1.573725 |
| 35            | 8             | 0           | -0.723762               | -3.186486 | -1.783883 |
| 36            | 1             | 0           | 0.443222                | -0.246430 | -1.424363 |

|     |    |   |           |           |           |
|-----|----|---|-----------|-----------|-----------|
| 37  | 6  | 0 | 1.826367  | -1.753798 | -1.719275 |
| 38  | 6  | 0 | 2.850100  | -0.800413 | -1.828426 |
| 39  | 6  | 0 | 2.156429  | -3.113803 | -1.789993 |
| 40  | 6  | 0 | 4.171170  | -1.198023 | -1.991255 |
| 41  | 1  | 0 | 2.612137  | 0.257581  | -1.754120 |
| 42  | 6  | 0 | 3.485999  | -3.495526 | -1.954838 |
| 43  | 1  | 0 | 1.376123  | -3.856398 | -1.701541 |
| 44  | 6  | 0 | 4.503595  | -2.550202 | -2.054443 |
| 45  | 1  | 0 | 4.946563  | -0.440647 | -2.062658 |
| 46  | 1  | 0 | 3.722737  | -4.555442 | -2.002393 |
| 47  | 1  | 0 | 5.537107  | -2.858399 | -2.182727 |
| 48  | 6  | 0 | -4.914473 | 0.763032  | 0.053537  |
| 49  | 1  | 0 | -4.332302 | 0.734353  | -0.870084 |
| 50  | 1  | 0 | -5.970374 | 0.605913  | -0.194695 |
| 51  | 16 | 0 | -4.811015 | 2.484995  | 0.668337  |
| 52  | 6  | 0 | -4.678071 | 3.380598  | -0.918191 |
| 53  | 1  | 0 | -3.873182 | 2.900078  | -1.486897 |
| 54  | 1  | 0 | -5.632984 | 3.223384  | -1.430638 |
| 55  | 6  | 0 | -4.403563 | 4.861079  | -0.684484 |
| 56  | 1  | 0 | -5.204812 | 5.310060  | -0.084919 |
| 57  | 1  | 0 | -3.471371 | 4.973367  | -0.116383 |
| 58  | 6  | 0 | -4.279667 | 5.602195  | -2.017851 |
| 59  | 1  | 0 | -3.521423 | 5.106731  | -2.636925 |
| 60  | 1  | 0 | -5.229270 | 5.525843  | -2.561956 |
| 61  | 6  | 0 | -3.906778 | 7.069667  | -1.827165 |
| 62  | 1  | 0 | -3.824227 | 7.582623  | -2.791216 |
| 63  | 1  | 0 | -4.659975 | 7.595879  | -1.229208 |
| 64  | 1  | 0 | -2.943335 | 7.166049  | -1.312517 |
| 65  | 7  | 0 | 0.528880  | -1.268634 | -1.508214 |
| 66  | 7  | 0 | -1.766721 | -1.204148 | -1.352727 |
| 67  | 6  | 0 | 1.115181  | 2.587653  | -1.328786 |
| 68  | 6  | 0 | -1.023098 | 2.237023  | -1.801021 |
| 69  | 6  | 0 | -0.854343 | 3.733357  | -2.049094 |
| 70  | 6  | 0 | 0.632795  | 3.961307  | -1.791444 |
| 71  | 1  | 0 | -1.501936 | 4.283530  | -1.358013 |
| 72  | 1  | 0 | -1.175365 | 3.977807  | -3.065672 |
| 73  | 1  | 0 | 0.845056  | 4.705600  | -1.018895 |
| 74  | 1  | 0 | 1.187469  | 4.252152  | -2.688942 |
| 75  | 8  | 0 | 2.260689  | 2.366789  | -0.918381 |
| 76  | 8  | 0 | -2.096909 | 1.635373  | -1.929310 |
| 77  | 7  | 0 | 0.133473  | 1.651467  | -1.402046 |
| 78  | 6  | 0 | 0.278212  | -2.131245 | 2.555521  |
| 79  | 6  | 0 | 0.689378  | -0.817928 | 2.334404  |
| 80  | 6  | 0 | 1.949642  | -0.598743 | 1.760907  |
| 81  | 6  | 0 | 2.780632  | -1.670116 | 1.439574  |
| 82  | 6  | 0 | 2.363710  | -2.973355 | 1.687817  |
| 83  | 6  | 0 | 1.106950  | -3.202761 | 2.239247  |
| 84  | 1  | 0 | -0.704815 | -2.315306 | 2.978003  |
| 85  | 1  | 0 | 3.741300  | -1.482445 | 0.971675  |
| 86  | 1  | 0 | 3.010959  | -3.804097 | 1.425119  |
| 87  | 1  | 0 | 0.761922  | -4.217442 | 2.414832  |
| 88  | 6  | 0 | -0.209129 | 0.340214  | 2.716225  |
| 89  | 1  | 0 | -1.246108 | -0.022896 | 2.739636  |
| 90  | 6  | 0 | -0.132878 | 1.461850  | 1.735938  |
| 91  | 1  | 0 | -0.060195 | 1.181574  | 0.686628  |
| 92  | 6  | 0 | -0.224828 | 2.795755  | 2.036541  |
| 93  | 1  | 0 | -0.249976 | 3.137079  | 3.068359  |
| 94  | 1  | 0 | -0.001764 | 3.537665  | 1.275354  |
| 95  | 1  | 0 | 0.024654  | 0.702117  | 3.724322  |
| 96  | 7  | 0 | 2.331806  | 0.756699  | 1.495245  |
| 97  | 1  | 0 | 2.297266  | 1.107669  | 0.524836  |
| 98  | 16 | 0 | 3.534947  | 1.497333  | 2.361744  |
| 99  | 8  | 0 | 3.563022  | 0.882995  | 3.682330  |
| 100 | 8  | 0 | 3.321697  | 2.931399  | 2.224332  |
| 101 | 6  | 0 | 5.039418  | 1.091614  | 1.502167  |
| 102 | 6  | 0 | 5.862746  | 0.078120  | 1.981576  |
| 103 | 6  | 0 | 5.311350  | 1.737545  | 0.297771  |
| 104 | 6  | 0 | 6.969719  | -0.302487 | 1.232315  |
| 105 | 1  | 0 | 5.640094  | -0.407923 | 2.925560  |
| 106 | 6  | 0 | 6.422699  | 1.349556  | -0.437386 |
| 107 | 1  | 0 | 4.643567  | 2.507472  | -0.075800 |
| 108 | 6  | 0 | 7.257844  | 0.316662  | 0.010202  |
| 109 | 1  | 0 | 7.623113  | -1.083824 | 1.608238  |
| 110 | 1  | 0 | 6.622694  | 1.830696  | -1.390106 |
| 111 | 6  | 0 | 8.409412  | -0.131610 | -0.813626 |
| 112 | 6  | 0 | 8.706558  | -1.495121 | -0.933477 |
| 113 | 6  | 0 | 9.207880  | 0.793609  | -1.496703 |
| 114 | 6  | 0 | 9.774209  | -1.921614 | -1.717424 |
| 115 | 1  | 0 | 8.084141  | -2.227788 | -0.426907 |
| 116 | 6  | 0 | 10.277584 | 0.366639  | -2.277579 |
| 117 | 1  | 0 | 9.002496  | 1.856183  | -1.399986 |
| 118 | 6  | 0 | 10.563548 | -0.992250 | -2.391393 |
| 119 | 1  | 0 | 9.984476  | -2.983402 | -1.807851 |
| 120 | 1  | 0 | 10.891664 | 1.098036  | -2.795036 |
| 121 | 1  | 0 | 11.396653 | -1.325166 | -3.003520 |
| 122 | 35 | 0 | -2.500139 | 2.500315  | 1.370005  |

TS2r

SCF Done: E(RwB97XD) = -6169.96123547 A.U.

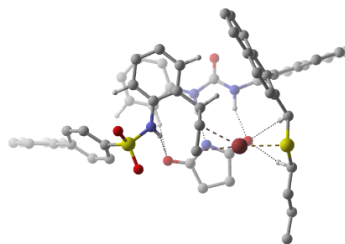

| Center Number | Atomic Number | Atomic Type | Coordinates (Angstroms) |           |           |
|---------------|---------------|-------------|-------------------------|-----------|-----------|
|               |               |             | X                       | Y         | Z         |
| 1             | 6             | 0           | 2.735422                | -4.706137 | -1.548229 |
| 2             | 6             | 0           | 3.165810                | -3.696615 | -0.724082 |
| 3             | 6             | 0           | 3.599919                | -2.453590 | -1.261188 |
| 4             | 6             | 0           | 3.569841                | -2.281289 | -2.673683 |
| 5             | 6             | 0           | 3.126692                | -3.346870 | -3.501149 |
| 6             | 6             | 0           | 2.720710                | -4.536103 | -2.952452 |
| 7             | 1             | 0           | 2.394596                | -5.642764 | -1.117303 |
| 8             | 1             | 0           | 3.143326                | -3.833736 | 0.351073  |
| 9             | 6             | 0           | 4.050698                | -1.375826 | -0.429985 |
| 10            | 6             | 0           | 3.998915                | -1.047628 | -3.224875 |
| 11            | 1             | 0           | 3.111983                | -3.197875 | -4.577722 |
| 12            | 1             | 0           | 2.380191                | -5.345678 | -3.591319 |
| 13            | 6             | 0           | 4.405690                | -0.026789 | -2.412295 |
| 14            | 6             | 0           | 4.410639                | -0.168102 | -0.999743 |
| 15            | 1             | 0           | 4.003282                | -0.923032 | -4.304306 |
| 16            | 1             | 0           | 4.738843                | 0.902004  | -2.867244 |
| 17            | 6             | 0           | 4.240932                | -1.622367 | 1.032616  |
| 18            | 6             | 0           | 5.558686                | -1.921030 | 1.519333  |
| 19            | 6             | 0           | 3.181249                | -1.613352 | 1.912687  |
| 20            | 6             | 0           | 6.696624                | -1.955139 | 0.667059  |
| 21            | 6             | 0           | 5.745283                | -2.204512 | 2.901708  |
| 22            | 6             | 0           | 3.375463                | -1.910886 | 3.286757  |
| 23            | 6             | 0           | 7.945147                | -2.233668 | 1.165218  |
| 24            | 1             | 0           | 6.572522                | -1.762475 | -0.393668 |
| 25            | 6             | 0           | 7.048535                | -2.487445 | 3.387615  |
| 26            | 6             | 0           | 4.619600                | -2.200289 | 3.767999  |
| 27            | 1             | 0           | 2.515528                | -1.894527 | 3.948325  |
| 28            | 6             | 0           | 8.127894                | -2.498614 | 2.541388  |
| 29            | 1             | 0           | 8.799739                | -2.253728 | 0.495120  |
| 30            | 1             | 0           | 7.174565                | -2.696479 | 4.446838  |
| 31            | 1             | 0           | 4.765436                | -2.419716 | 4.822292  |
| 32            | 1             | 0           | 9.121383                | -2.714575 | 2.923073  |
| 33            | 1             | 0           | 1.757118                | -0.219330 | 1.412402  |
| 34            | 6             | 0           | 0.813334                | -2.074272 | 1.645424  |
| 35            | 8             | 0           | 0.953963                | -3.276186 | 1.858269  |
| 36            | 1             | 0           | -0.368656               | -0.404500 | 1.510390  |
| 37            | 6             | 0           | -1.667963               | -2.014682 | 1.469299  |
| 38            | 6             | 0           | -2.771270               | -1.152785 | 1.564859  |
| 39            | 6             | 0           | -1.891264               | -3.382698 | 1.269122  |
| 40            | 6             | 0           | -4.064493               | -1.646239 | 1.448395  |
| 41            | 1             | 0           | -2.608728               | -0.086523 | 1.700796  |
| 42            | 6             | 0           | -3.194558               | -3.862517 | 1.163628  |
| 43            | 1             | 0           | -1.048877               | -4.056061 | 1.190329  |
| 44            | 6             | 0           | -4.289531               | -3.006592 | 1.247569  |
| 45            | 1             | 0           | -4.900429               | -0.954739 | 1.506956  |
| 46            | 1             | 0           | -3.348539               | -4.926167 | 1.001956  |
| 47            | 1             | 0           | -5.300957               | -3.391414 | 1.155202  |
| 48            | 6             | 0           | 4.844362                | 0.962988  | -0.091133 |
| 49            | 1             | 0           | 4.243340                | 0.967596  | 0.821263  |
| 50            | 1             | 0           | 5.900572                | 0.869223  | 0.185232  |
| 51            | 16            | 0           | 4.664101                | 2.630934  | -0.830272 |
| 52            | 6             | 0           | 4.513235                | 3.635206  | 0.684977  |
| 53            | 1             | 0           | 3.746872                | 3.160299  | 1.307016  |
| 54            | 1             | 0           | 5.480144                | 3.570683  | 1.195017  |
| 55            | 6             | 0           | 4.161835                | 5.078515  | 0.343020  |
| 56            | 1             | 0           | 4.929149                | 5.512788  | -0.309913 |
| 57            | 1             | 0           | 3.216008                | 5.104296  | -0.214473 |
| 58            | 6             | 0           | 4.029609                | 5.920754  | 1.613570  |
| 59            | 1             | 0           | 3.295109                | 5.453718  | 2.281540  |
| 60            | 1             | 0           | 4.987375                | 5.917595  | 2.148886  |
| 61            | 6             | 0           | 3.609702                | 7.357279  | 1.315047  |
| 62            | 1             | 0           | 3.522060                | 7.940494  | 2.237807  |
| 63            | 1             | 0           | 4.340406                | 7.857424  | 0.668703  |
| 64            | 1             | 0           | 2.638558                | 7.385592  | 0.806749  |
| 65            | 7             | 0           | -0.395924               | -1.431661 | 1.535399  |

|     |    |   |            |           |           |    |    |   |           |           |           |
|-----|----|---|------------|-----------|-----------|----|----|---|-----------|-----------|-----------|
| 66  | 7  | 0 | 1.890428   | -1.233823 | 1.458916  | 10 | 6  | 0 | -3.654896 | -0.923895 | 3.209035  |
| 67  | 6  | 0 | -1.107035  | 2.409516  | 1.339462  | 11 | 1  | 0 | -2.827403 | -3.100563 | 4.571773  |
| 68  | 6  | 0 | 1.070440   | 2.189597  | 1.662514  | 12 | 1  | 0 | -2.364056 | -5.331012 | 3.610905  |
| 69  | 6  | 0 | 0.852982   | 3.695867  | 1.771056  | 13 | 6  | 0 | -4.068943 | 0.094314  | 2.391863  |
| 70  | 6  | 0 | -0.664116  | 3.831076  | 1.676393  | 14 | 6  | 0 | -4.229978 | -0.097391 | 0.995330  |
| 71  | 1  | 0 | 1.371147   | 4.179588  | 0.935585  | 15 | 1  | 0 | -3.544862 | -0.757597 | 4.277458  |
| 72  | 1  | 0 | 1.289504   | 4.077102  | 2.697796  | 16 | 1  | 0 | -4.287812 | 1.061665  | 2.834370  |
| 73  | 1  | 0 | -1.010583  | 4.523176  | 0.904428  | 17 | 6  | 0 | -4.287874 | -1.623592 | -0.987653 |
| 74  | 1  | 0 | -1.126386  | 4.132211  | 2.622036  | 18 | 6  | 0 | -5.616443 | -2.026484 | -1.350885 |
| 75  | 8  | 0 | -2.263758  | 2.110421  | 1.018159  | 19 | 6  | 0 | -3.319641 | -1.529021 | -1.962266 |
| 76  | 8  | 0 | 2.176120   | 1.644734  | 1.764547  | 20 | 6  | 0 | -6.656613 | -2.156210 | -0.390583 |
| 77  | 7  | 0 | -0.083049  | 1.523216  | 1.408510  | 21 | 6  | 0 | -5.911003 | -2.320755 | -2.711474 |
| 78  | 6  | 0 | -0.252236  | -2.407889 | -2.072755 | 22 | 6  | 0 | -3.624153 | -1.819334 | -3.317641 |
| 79  | 6  | 0 | -0.651571  | -1.104130 | -1.780995 | 23 | 6  | 0 | -7.917088 | -2.550864 | -0.764574 |
| 80  | 6  | 0 | -2.022367  | -0.812986 | -1.729708 | 24 | 1  | 0 | -6.446668 | -1.942283 | 0.652413  |
| 81  | 6  | 0 | -2.958844  | -1.815851 | -1.978117 | 25 | 6  | 0 | -7.224771 | -2.723781 | -3.068004 |
| 82  | 6  | 0 | -2.541934  | -3.101680 | -2.302027 | 26 | 6  | 0 | -4.882373 | -2.204596 | -3.683751 |
| 83  | 6  | 0 | -1.184243  | -3.403360 | -2.341879 | 27 | 1  | 0 | -2.834606 | -1.724550 | -4.056563 |
| 84  | 1  | 0 | 0.807588   | -2.641141 | -2.083714 | 28 | 6  | 0 | -8.207576 | -2.837877 | -2.118085 |
| 85  | 1  | 0 | -4.017228  | -1.598576 | -1.894968 | 29 | 1  | 0 | -8.697638 | -2.644534 | -0.015127 |
| 86  | 1  | 0 | -3.283475  | -3.872144 | -2.489957 | 30 | 1  | 0 | -7.435060 | -2.942384 | -4.111935 |
| 87  | 1  | 0 | -0.849087  | -4.410856 | -2.569243 | 31 | 1  | 0 | -5.111416 | -2.423925 | -4.723161 |
| 88  | 6  | 0 | 0.389679   | -0.055794 | -1.452838 | 32 | 1  | 0 | -9.209377 | -3.147846 | -2.400891 |
| 89  | 1  | 0 | 0.208586   | 0.372669  | -0.463106 | 33 | 1  | 0 | -1.875513 | -0.072006 | -1.699968 |
| 90  | 6  | 0 | 0.436313   | 1.051980  | -2.457255 | 34 | 6  | 0 | -0.938984 | -1.942054 | -1.782681 |
| 91  | 1  | 0 | 0.764518   | 0.799585  | -3.464825 | 35 | 8  | 0 | -1.084898 | -3.154902 | -1.909673 |
| 92  | 6  | 0 | 0.024123   | 2.349328  | -2.205856 | 36 | 1  | 0 | 0.251859  | -0.270916 | -1.708662 |
| 93  | 1  | 0 | -0.465435  | 2.600760  | -1.271953 | 37 | 6  | 0 | 1.550350  | -1.873949 | -1.666978 |
| 94  | 1  | 0 | -0.038632  | 3.072768  | -3.012961 | 38 | 6  | 0 | 2.647207  | -0.998195 | -1.707897 |
| 95  | 1  | 0 | 1.370349   | -0.541822 | -1.429928 | 39 | 6  | 0 | 1.785685  | -3.247703 | -1.524331 |
| 96  | 7  | 0 | -2.406755  | 0.517209  | -1.397931 | 40 | 6  | 0 | 3.943985  | -1.484675 | -1.605613 |
| 97  | 1  | 0 | -2.210564  | 0.889585  | -0.457191 | 41 | 1  | 0 | 2.476270  | 0.071727  | -1.795936 |
| 98  | 16 | 0 | -3.600610  | 1.359418  | -2.162074 | 42 | 6  | 0 | 3.093021  | -3.718997 | -1.430439 |
| 99  | 8  | 0 | -3.745778  | 0.807095  | -3.502119 | 43 | 1  | 0 | 0.948838  | -3.930955 | -1.486690 |
| 100 | 8  | 0 | -3.280177  | 2.769662  | -1.983749 | 44 | 6  | 0 | 4.180542  | -2.850916 | -1.467155 |
| 101 | 6  | 0 | -5.096956  | 1.036597  | -1.250310 | 45 | 1  | 0 | 4.773782  | -0.784141 | -1.627317 |
| 102 | 6  | 0 | -6.051604  | 0.170896  | -1.772922 | 46 | 1  | 0 | 3.255422  | -4.787426 | -1.315358 |
| 103 | 6  | 0 | -5.262271  | 1.623432  | 0.002899  | 47 | 1  | 0 | 5.195022  | -3.230008 | -1.385614 |
| 104 | 6  | 0 | -7.180886  | -0.127267 | -1.019612 | 48 | 6  | 0 | -4.676153 | 1.014469  | 0.066990  |
| 105 | 1  | 0 | -5.909264  | -0.274392 | -2.752147 | 49 | 1  | 0 | -3.973718 | 1.089080  | -0.768494 |
| 106 | 6  | 0 | -6.399165  | 1.322200  | 0.740676  | 50 | 1  | 0 | -5.663897 | 0.786118  | -0.347589 |
| 107 | 1  | 0 | -4.504285  | 2.290785  | 0.401212  | 51 | 16 | 0 | -4.745165 | 2.674983  | 0.831200  |
| 108 | 6  | 0 | -7.369319  | 0.438115  | 0.247099  | 52 | 6  | 0 | -4.701946 | 3.691088  | -0.685688 |
| 109 | 1  | 0 | -7.912327  | -0.825526 | -1.414745 | 53 | 1  | 0 | -3.930137 | 3.276101  | -1.342834 |
| 110 | 1  | 0 | -6.539096  | 1.789159  | 1.711121  | 54 | 1  | 0 | -5.669511 | 3.603681  | -1.190874 |
| 111 | 6  | 0 | -8.565283  | 0.093947  | 1.058946  | 55 | 6  | 0 | -4.400723 | 5.147027  | -0.344796 |
| 112 | 6  | 0 | -9.821959  | -0.051429 | 0.458591  | 56 | 1  | 0 | -5.153456 | 5.535189  | 0.353943  |
| 113 | 6  | 0 | -8.454227  | -0.103222 | 2.441047  | 57 | 1  | 0 | -3.431843 | 5.211268  | 0.169476  |
| 114 | 6  | 0 | -10.938161 | -0.384785 | 1.219877  | 58 | 6  | 0 | -4.370477 | 6.022066  | -1.599517 |
| 115 | 1  | 0 | -9.932236  | 0.117035  | -0.609108 | 59 | 1  | 0 | -3.636592 | 5.614653  | -2.307195 |
| 116 | 6  | 0 | -9.570514  | -0.438063 | 3.201634  | 60 | 1  | 0 | -5.346377 | 5.970009  | -2.098930 |
| 117 | 1  | 0 | -7.484080  | -0.014988 | 2.922222  | 61 | 6  | 0 | -4.029152 | 7.477131  | -1.288620 |
| 118 | 6  | 0 | -10.816046 | -0.579948 | 2.593006  | 62 | 1  | 0 | -4.018189 | 8.084594  | -2.200158 |
| 119 | 1  | 0 | -11.906145 | -0.487315 | 0.738055  | 63 | 1  | 0 | -4.762341 | 7.915982  | -0.601371 |
| 120 | 1  | 0 | -9.463544  | -0.596052 | 4.270865  | 64 | 1  | 0 | -3.041407 | 7.559722  | -0.819303 |
| 121 | 1  | 0 | -11.687111 | -0.841577 | 3.187675  | 65 | 7  | 0 | 0.276080  | -1.297246 | -1.741869 |
| 122 | 35 | 0 | 2.253282   | 2.379897  | -1.619587 | 66 | 7  | 0 | -2.008396 | -1.086343 | -1.629564 |

INT-r

SCF Done: E(RwB97XD) = -6169.96392664 A.U.

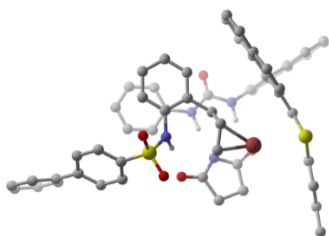

| Center Number | Atomic Number | Atomic Type | Coordinates (Angstroms) |           |           |
|---------------|---------------|-------------|-------------------------|-----------|-----------|
|               |               |             | X                       | Y         | Z         |
| 1             | 6             | 0           | -2.845310               | -4.731633 | 1.581392  |
| 2             | 6             | 0           | -3.261185               | -3.716265 | 0.757901  |
| 3             | 6             | 0           | -3.546870               | -2.425030 | 1.282625  |
| 4             | 6             | 0           | -3.380183               | -2.208613 | 2.679500  |
| 5             | 6             | 0           | -2.950573               | -3.280782 | 3.507002  |
| 6             | 6             | 0           | -2.692924               | -4.516511 | 2.972229  |
| 7             | 1             | 0           | -2.625498               | -5.708658 | 1.161563  |
| 8             | 1             | 0           | -3.349177               | -3.884785 | -0.309500 |
| 9             | 6             | 0           | -3.989702               | -1.348120 | 0.451768  |

|     |    |   |           |           |           |    |    |   |           |           |           |
|-----|----|---|-----------|-----------|-----------|----|----|---|-----------|-----------|-----------|
| 97  | 1  | 0 | 2.247633  | 0.858993  | 0.508046  | 40 | 6  | 0 | -3.897327 | -1.754855 | 1.668706  |
| 98  | 16 | 0 | 3.648510  | 1.176539  | 2.247554  | 41 | 1  | 0 | -2.476175 | -0.146128 | 1.709435  |
| 99  | 8  | 0 | 3.784596  | 0.523537  | 3.541691  | 42 | 6  | 0 | -2.982525 | -3.971110 | 1.664374  |
| 100 | 8  | 0 | 3.338651  | 2.599154  | 2.179150  | 43 | 1  | 0 | -0.831325 | -4.114506 | 1.711974  |
| 101 | 6  | 0 | 5.133242  | 0.902627  | 1.307435  | 44 | 6  | 0 | -4.094661 | -3.134283 | 1.642617  |
| 102 | 6  | 0 | 6.095671  | 0.020209  | 1.784852  | 45 | 1  | 0 | -4.747581 | -1.078489 | 1.645445  |
| 103 | 6  | 0 | 5.282467  | 1.543810  | 0.078778  | 46 | 1  | 0 | -3.115164 | -5.049695 | 1.644797  |
| 104 | 6  | 0 | 7.219135  | -0.239134 | 1.009531  | 47 | 1  | 0 | -5.097831 | -3.548684 | 1.605955  |
| 105 | 1  | 0 | 5.963477  | -0.467343 | 2.745096  | 48 | 6  | 0 | 4.572745  | 1.075033  | -0.057889 |
| 106 | 6  | 0 | 6.413057  | 1.278661  | -0.681949 | 49 | 1  | 0 | 3.772153  | 1.159474  | 0.684700  |
| 107 | 1  | 0 | 4.520619  | 2.228817  | -0.281882 | 50 | 1  | 0 | 5.487927  | 0.800964  | 0.475630  |
| 108 | 6  | 0 | 7.391744  | 0.379064  | -0.234516 | 51 | 16 | 0 | 4.800602  | 2.748030  | -0.764051 |
| 109 | 1  | 0 | 7.957476  | -0.949526 | 1.368297  | 52 | 6  | 0 | 4.560032  | 3.732637  | 0.760251  |
| 110 | 1  | 0 | 6.541287  | 1.784700  | -1.634033 | 53 | 1  | 0 | 3.836226  | 3.200476  | 1.387066  |
| 111 | 6  | 0 | 8.581380  | 0.072334  | -1.070077 | 54 | 1  | 0 | 5.510260  | 3.781893  | 1.301109  |
| 112 | 6  | 0 | 9.843092  | -0.090204 | -0.485000 | 55 | 6  | 0 | 4.045851  | 5.132743  | 0.438365  |
| 113 | 6  | 0 | 8.459337  | -0.075189 | -2.457405 | 56 | 1  | 0 | 4.739923  | 5.652889  | -0.234596 |
| 114 | 6  | 0 | 10.954048 | -0.393735 | -1.266002 | 57 | 1  | 0 | 3.090423  | 5.049018  | -0.097683 |
| 115 | 1  | 0 | 9.960899  | 0.041787  | 0.586990  | 58 | 6  | 0 | 3.847668  | 5.958880  | 1.710597  |
| 116 | 6  | 0 | 9.570450  | -0.380999 | -3.237612 | 59 | 1  | 0 | 3.217675  | 5.393827  | 2.409570  |
| 117 | 1  | 0 | 7.485371  | 0.027598  | -2.927945 | 60 | 1  | 0 | 4.816572  | 6.096817  | 2.207401  |
| 118 | 6  | 0 | 10.820954 | -0.541722 | -2.644928 | 61 | 6  | 0 | 3.210871  | 7.318439  | 1.434693  |
| 119 | 1  | 0 | 11.926014 | -0.510093 | -0.795535 | 62 | 1  | 0 | 3.070970  | 7.884511  | 2.361940  |
| 120 | 1  | 0 | 9.455446  | -0.502512 | -4.310723 | 63 | 1  | 0 | 3.835884  | 7.921140  | 0.764992  |
| 121 | 1  | 0 | 11.687498 | -0.781561 | -3.254246 | 64 | 1  | 0 | 2.228430  | 7.203069  | 0.960903  |
| 122 | 35 | 0 | -1.776222 | 2.437771  | 1.704582  | 65 | 7  | 0 | -0.235513 | -1.450451 | 1.745701  |

**TS3r**

SCF Done: E(RwB97XD) = -6169.95855175 A.U.

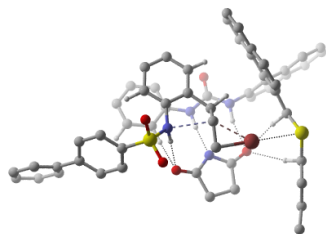

| Center Number | Atomic Number | Atomic Type | Coordinates (Angstroms) |           |           |
|---------------|---------------|-------------|-------------------------|-----------|-----------|
|               |               |             | X                       | Y         | Z         |
| 1             | 6             | 0           | 2.931602                | -4.641305 | -1.860536 |
| 2             | 6             | 0           | 3.355303                | -3.665552 | -0.994423 |
| 3             | 6             | 0           | 3.586791                | -2.337843 | -1.452075 |
| 4             | 6             | 0           | 3.371621                | -2.047665 | -2.829060 |
| 5             | 6             | 0           | 2.931061                | -3.079811 | -3.700589 |
| 6             | 6             | 0           | 2.716974                | -4.348776 | -3.228990 |
| 7             | 1             | 0           | 2.751486                | -5.647023 | -1.492281 |
| 8             | 1             | 0           | 3.485737                | -3.892347 | 0.057761  |
| 9             | 6             | 0           | 4.010602                | -1.293869 | -0.572293 |
| 10            | 6             | 0           | 3.602494                | -0.729784 | -3.293472 |
| 11            | 1             | 0           | 2.766479                | -2.842991 | -4.748669 |
| 12            | 1             | 0           | 2.378237                | -5.131898 | -3.900859 |
| 13            | 6             | 0           | 4.008103                | 0.254056  | -2.431246 |
| 14            | 6             | 0           | 4.199949                | -0.007637 | -1.050910 |
| 15            | 1             | 0           | 3.459234                | -0.509142 | -4.348009 |
| 16            | 1             | 0           | 4.180247                | 1.252298  | -2.820966 |
| 17            | 6             | 0           | 4.323181                | -1.626065 | 0.852105  |
| 18            | 6             | 0           | 5.660443                | -2.022587 | 1.191620  |
| 19            | 6             | 0           | 3.364028                | -1.574796 | 1.838244  |
| 20            | 6             | 0           | 6.691694                | -2.112798 | 0.217559  |
| 21            | 6             | 0           | 5.974236                | -2.347928 | 2.540920  |
| 22            | 6             | 0           | 3.688257                | -1.894033 | 3.182874  |
| 23            | 6             | 0           | 7.961035                | -2.501305 | 0.567323  |
| 24            | 1             | 0           | 6.467352                | -1.872816 | -0.816652 |
| 25            | 6             | 0           | 7.296821                | -2.742466 | 2.872863  |
| 26            | 6             | 0           | 4.955605                | -2.268166 | 3.527136  |
| 27            | 1             | 0           | 2.905414                | -1.829133 | 3.932292  |
| 28            | 6             | 0           | 8.270150                | -2.819833 | 1.909588  |
| 29            | 1             | 0           | 8.734514                | -2.565237 | -0.192442 |
| 30            | 1             | 0           | 7.521515                | -2.984176 | 3.908705  |
| 31            | 1             | 0           | 5.199020                | -2.508366 | 4.558648  |
| 32            | 1             | 0           | 9.278988                | -3.123730 | 2.173321  |
| 33            | 1             | 0           | 1.871648                | -0.154162 | 1.714270  |
| 34            | 6             | 0           | 0.999239                | -2.052489 | 1.678844  |
| 35            | 8             | 0           | 1.191017                | -3.264945 | 1.710076  |
| 36            | 1             | 0           | -0.249255               | -0.423663 | 1.731318  |
| 37            | 6             | 0           | -1.492325               | -2.068941 | 1.722759  |
| 38            | 6             | 0           | -2.614639               | -1.224524 | 1.710787  |
| 39            | 6             | 0           | -1.688649               | -3.456106 | 1.705151  |
| 40            | 6             | 0           | -3.897327               | -1.754855 | 1.668706  |
| 41            | 1             | 0           | -2.476175               | -0.146128 | 1.709435  |
| 42            | 6             | 0           | -2.982525               | -3.971110 | 1.664374  |
| 43            | 1             | 0           | -0.831325               | -4.114506 | 1.711974  |
| 44            | 6             | 0           | -4.094661               | -3.134283 | 1.642617  |
| 45            | 1             | 0           | -4.747581               | -1.078489 | 1.645445  |
| 46            | 1             | 0           | -3.115164               | -5.049695 | 1.644797  |
| 47            | 1             | 0           | -5.097831               | -3.548684 | 1.605955  |
| 48            | 6             | 0           | 4.572745                | 1.075033  | -0.057889 |
| 49            | 1             | 0           | 3.772153                | 1.159474  | 0.684700  |
| 50            | 1             | 0           | 5.487927                | 0.800964  | 0.475630  |
| 51            | 16            | 0           | 4.800602                | 2.748030  | -0.764051 |
| 52            | 6             | 0           | 4.560032                | 3.732637  | 0.760251  |
| 53            | 1             | 0           | 3.836226                | 3.200476  | 1.387066  |
| 54            | 1             | 0           | 5.510260                | 3.781893  | 1.301109  |
| 55            | 6             | 0           | 4.045851                | 5.132743  | 0.438365  |
| 56            | 1             | 0           | 4.739923                | 5.652889  | -0.234596 |
| 57            | 1             | 0           | 3.090423                | 5.049018  | -0.097683 |
| 58            | 6             | 0           | 3.847668                | 5.958880  | 1.710597  |
| 59            | 1             | 0           | 3.217675                | 5.393827  | 2.409570  |
| 60            | 1             | 0           | 4.816572                | 6.096817  | 2.207401  |
| 61            | 6             | 0           | 3.210871                | 7.318439  | 1.434693  |
| 62            | 1             | 0           | 3.070970                | 7.884511  | 2.361940  |
| 63            | 1             | 0           | 3.835884                | 7.921140  | 0.764992  |
| 64            | 1             | 0           | 2.228430                | 7.203069  | 0.960903  |
| 65            | 7             | 0           | -0.235513               | -1.450451 | 1.745701  |
| 66            | 7             | 0           | 2.035986                | -1.151027 | 1.538390  |
| 67            | 6             | 0           | -1.138871               | 2.369299  | 1.484422  |
| 68            | 6             | 0           | 1.007286                | 2.210488  | 1.994777  |
| 69            | 6             | 0           | 0.714963                | 3.696294  | 2.174853  |
| 70            | 6             | 0           | -0.797266               | 3.772320  | 1.978783  |
| 71            | 1             | 0           | 1.268153                | 4.253213  | 1.409445  |
| 72            | 1             | 0           | 1.070053                | 4.037968  | 3.150305  |
| 73            | 1             | 0           | -1.126340               | 4.517881  | 1.250264  |
| 74            | 1             | 0           | -1.336761               | 3.960575  | 2.912789  |
| 75            | 8             | 0           | -2.239654               | 2.066619  | 0.996396  |
| 76            | 8             | 0           | 2.116860                | 1.698435  | 2.171762  |
| 77            | 7             | 0           | -0.091955               | 1.519498  | 1.588223  |
| 78            | 6             | 0           | -0.142507               | -2.431226 | -1.630067 |
| 79            | 6             | 0           | -0.585418               | -1.115511 | -1.545454 |
| 80            | 6             | 0           | -1.953615               | -0.843538 | -1.612127 |
| 81            | 6             | 0           | -2.873158               | -1.875082 | -1.769592 |
| 82            | 6             | 0           | -2.417422               | -3.185169 | -1.879618 |
| 83            | 6             | 0           | -1.056125               | -3.465394 | -1.804597 |
| 84            | 1             | 0           | 0.917528                | -2.644065 | -1.574965 |
| 85            | 1             | 0           | -3.936693               | -1.669124 | -1.790033 |
| 86            | 1             | 0           | -3.136735               | -3.988850 | -2.001731 |
| 87            | 1             | 0           | -0.701824               | -4.489099 | -1.733445 |
| 88            | 6             | 0           | 0.371476                | 0.029369  | -1.283741 |
| 89            | 1             | 0           | 0.335012                | 0.343930  | -0.236676 |
| 90            | 6             | 0           | 0.085813                | 1.188922  | -2.163954 |
| 91            | 1             | 0           | 0.148389                | 1.014951  | -3.239702 |
| 92            | 6             | 0           | -0.187379               | 2.543788  | -1.748461 |
| 93            | 1             | 0           | -0.622408               | 2.696100  | -0.770104 |
| 94            | 1             | 0           | -0.537159               | 3.224979  | -2.517562 |
| 95            | 1             | 0           | 1.385213                | -0.317514 | -1.514036 |
| 96            | 7             | 0           | -2.295136               | 0.539747  | -1.471727 |
| 97            | 1             | 0           | -2.234866               | 0.922850  | -0.508362 |
| 98            | 16            | 0           | -3.542275               | 1.269181  | -2.313118 |
| 99            | 8             | 0           | -3.613988               | 0.637049  | -3.620785 |
| 100           | 8             | 0           | -3.277377               | 2.696517  | -2.195243 |
| 101           | 6             | 0           | -5.023874               | 0.906800  | -1.402410 |
| 102           | 6             | 0           | -5.971632               | 0.044000  | -1.943475 |
| 103           | 6             | 0           | -5.190915               | 1.473603  | -0.140203 |
| 104           | 6             | 0           | -7.101670               | -0.267712 | -1.197588 |
| 105           | 1             | 0           | -5.822026               | -0.388916 | -2.927086 |
| 106           | 6             | 0           | -6.327227               | 1.155058  | 0.589783  |
| 107           | 1             | 0           | -4.440147               | 2.140748  | 0.272764  |
| 108           | 6             | 0           | -7.293816               | 0.277103  | 0.077826  |
| 109           | 1             | 0           | -7.829857               | -0.962062 | -1.604870 |
| 110           | 1             | 0           | -6.470677               | 1.606064  | 1.566979  |
| 111           | 6             | 0           | -8.492559               | -0.078924 | 0.879654  |
| 112           | 6             | 0           | -9.745636               | -0.220049 | 0.270874  |
| 113           | 6             | 0           | -8.387909               | -0.288580 | 2.260340  |
| 114           | 6             | 0           | -10.865313              | -0.560794 | 1.023574  |
| 115           | 1             | 0           | -9.851012               | -0.041868 | -0.795717 |
| 116           | 6             | 0           | -9.507709               | -0.631351 | 3.011958  |
| 117           | 1             | 0           | -7.420523               | -0.203512 | 2.747593  |
| 118           | 6             | 0           | -10.749923              | -0.768193 | 2.396365  |
| 119           | 1             | 0           | -11.830821              | -0.659477 | 0.536126  |
| 120           | 1             | 0           | -9.406265               | -0.798658 | 4.080257  |
| 121           | 1             | 0           | -11.623974              | -1.035205 | 2.983241  |
| 122           | 35            | 0           | 1.807373                | 2.721811  | -1.579186 |
